# Supplementary material for: Assessing the Diversity and Population Substructure of Sarda Breed Bucks by Using Mtdna and Y-Chromosome Markers
Source: MDPI journal article supplement (doi:10.3390/ani10122194), 2020-11-24
Supplement: s1 [file s1]

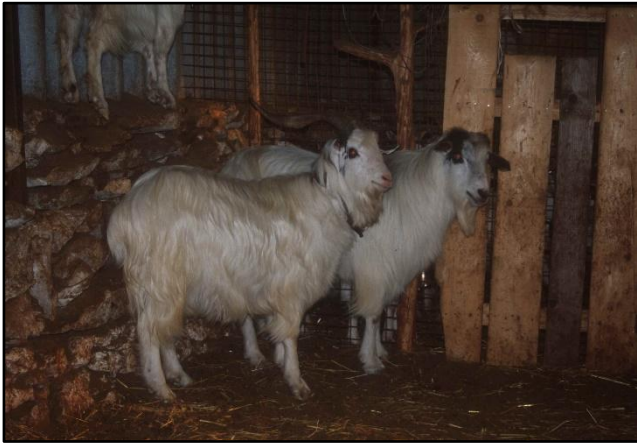

(a)

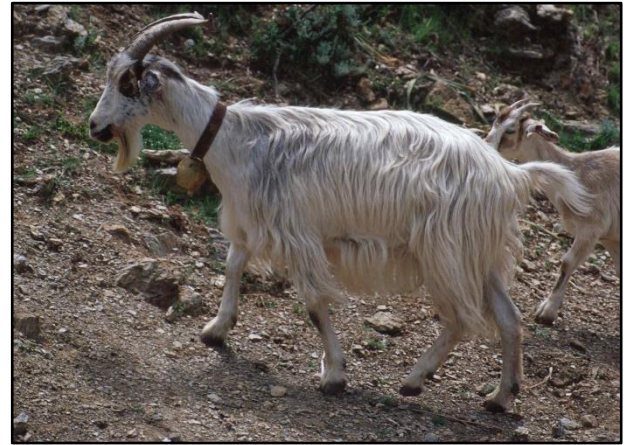

(b)

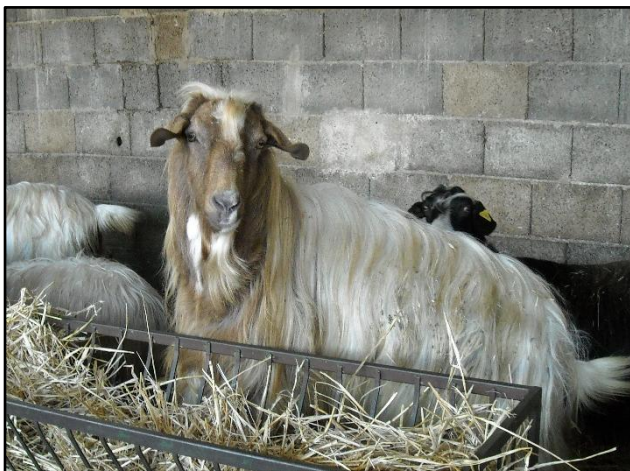

(c)

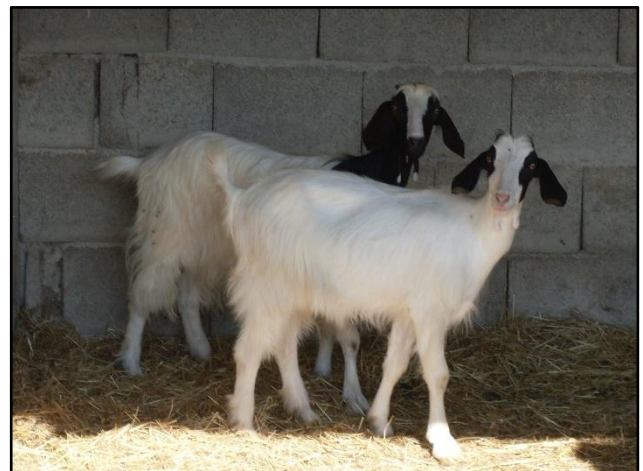

(d)

**Supplementary Figure 1.** Bucks and goats of Sarda breed from the subregions of Sardinia Nuorese, Barbagia, Baronia, Ogliastra and Sarrabus, showing the common morphological traits of the ancient breed: short ears, horned, grey coat (a, b); and from the subregions Guspinese, Iglesiente and Sulcis, showing the morphological traits of imported breeds: long ears, polled, black or red patched coat (c, d). Original pictures by G.M. Vacca and M. Pazzola.
