# Supplementary material for: Assessing the Diversity and Population Substructure of Sarda Breed Bucks by Using Mtdna and Y-Chromosome Markers
Source: MDPI journal article supplement (doi:10.3390/ani10122194), 2020-11-24
Supplement: s1 [file s1]

**Supplementary Table 1.** Distribution of the bucks mtDNA haplotypes in the 11 clades representing haplogroup A according to Piras et al., (2012).

| <b>Clade</b> | <b>Region</b>                                                         | <b>Number of Haplotypes</b> |
|--------------|-----------------------------------------------------------------------|-----------------------------|
| A1           | Nuorese, Sulcis                                                       | 2                           |
| A2           | Barbagia, Baronia, Ogliastra, Guspinese, Iglesiente, Sulcis           | 18                          |
| A3           | Ogliastra, Sarrabus                                                   | 4                           |
| A4           | Nuorese, Barbagia, Baronia, Ogliastra, Sarrabus, Iglesiente, Sulcis   | 23                          |
| A5           | Barbagia, Baronia, Ogliastra, Guspinese, Iglesiente, Sulcis           | 11                          |
| A6           | Baronia, Ogliastra, Guspinese, Iglesiente, Sulcis                     | 6                           |
| A7           | Barbagia, Baronia, Ogliastra, Iglesiente, Sulcis                      | 11                          |
| A8           | Nuorese, Ogliastra, Guspinese, Sulcis,                                | 10                          |
| A9           | -                                                                     | 0                           |
| A10          | Ogliastra, Sulcis                                                     | 2                           |
| A11          | Barbagia, Baronia, Ogliastra, Sarrabus, Guspinese, Iglesiente, Sulcis | 19                          |
