# Supplementary material for: Assessing the Diversity and Population Substructure of Sarda Breed Bucks by Using Mtdna and Y-Chromosome Markers
Source: Animals (Basel). 2020 Nov 24;10(12):2194. doi: 10.3390/ani10122194 (PMC7761473; doi:10.3390/ani10122194)
Supplement: Supplementary file 1 [file animals-10-02194-s001.zip › Supplementrary -animals-1006852/Supplementary File 1.txt]

List of mtDNA Sequences
>EF617738.1_Mediteranean_Europe
TTCATATAGTTTACTGTATATCTACCCTACACATATGCAGTACTAATCCAGCATAAACGTAATGTATGTACATTACATTTTATGATCTACTTCATGTGCACGTACATAATGTTAATGTAACAAGGACATAGTATGTATATAGTACATTAAACGATTTTCCACATGCATATTAAGCACGTACATCAGTATTAATGTAATAAGGACATAATATGTATATTGTACATTAAACGATCTTCCTCATGCATATAAGCATGTATAATGCCTCTATTGGCAGTACATAGTACATTTTACTGCATATCCGTACATGGCACATAGAGTCAAATCCATTCTTGCCAACATGCGTATCCCGTCCACTAGATCACGAGCTTGTTGACCATGCCGCGTGAAA
>EF617755.1_Mediteranean_Europe
TTCATATAGTTTACTGTATATCTACCCTACACATATGCAGTACTAATCCAGCATAAACGTAATGTATGTACATTACATTTTATGATCTACTTCATGTGCACGTACATAATATTAATGTAACAAGGACATAGTATGTATATAGTACATTAAACGATTTTCCACATGCATATTAAGCACGTACATCAGTATTAATGTAATAAGGACATAATATGTATATTGTACATTAAACGATCTTCCTCATGCATATAAGCATGTATAATGCTTCTATTGGCAGTACATAGTACATTTTACTGCATACTCGTACATGGCACATAGAGTCAAATCCATTCTTGTCAACATGCGTATCCCGTCCACTAGATCACGAGCTTGTTGACCATGCCGCGTGAAA
>EF617787.1_Mediteranean_Europe
TTCATATAGTTTACTATATATCTACCCTACATATATGCAGTACTAATCCAACATAAACATAATGTATGTACATTACATTTTATGGTCTACTTCACGTGTACGTACATAACATTAATGTAACAAGGACATAATATGTATATAGTACATTAGATGGTTTCCCACATGCATATTAAGCACGTACATCAGTATTAATGTAGTAAGGACATAATATGTATATTGTACATTAAACGATCTTCCCCATGCATATAAGCATGTACAATATCCCTATTGATAGTACATAGCACATTCTATTGTATACCCGTACATAGCGCATGAAGTCAAATCCGTTCTCGTCAACATGCATATCCCGTCCACTAGATCACGAGCTTGTTCACCATGCCGCGTGAAA
>EF617739.1_Mediteranean_Europe
TTCATATAGTTTACTGTATATCTACCCTACACATATGCAGTACTAATCCAGCATAAACGTAATGTATGTACATTACATTTTATGATCTACTTCATGTGCACGTACATAATATTAATGTAACAAGGGCATAGTATGTATATAGTACATTAAACGATTTTCCACATGCATATTAAGCACGTACATCAGTATTAATGTAATAAGGACATAATATGTATATTGTACATTAAACGATCTTCCTCATGCATATAAGCATGTATAATGCCTCTATTGGCAGTACATAGTACATTTTACTGCATATCCGTACATGGCACATAGAGTCAAATCCATTCTTGCCAACATGCGTATCCCGTCCACTAGATCACGAGCTTGTTGACCATGCCGCGTGAAA
>EF617786.1_Mediteranean_Europe
TTCATATAGTTTACTATATATCTACCCTACATATATGCAGTACTAATCCAACATAAACATAATGTATGTACATTACATTTTATGGTCTACTTCACGTGTACGTACATAACATTAATGTAACAAGGACATAATATGTATATAGTACATTAGATGGTTTCCCACATGCATATTAAGCACGTACATCAGTATTAATGTAGTAAGGACATAATATGTATATTGTACATTAAACGATCTTCCCCATGCATATAAGCATGTACAATATCCCTATTGATAGTACATAGCACATTCTATTGTATACCCGTACATAGCGCATGAAGTCAAATCCGTTCTCGTCAACATGCATATCCCGTCCACTAGATCACGAGCTTGTTCACCATGCCGCGTGAAA
>EF617756.1_Mediteranean_Europe
TTCATATAGTTTACTGTATATCTACCCTACACATATGCAGTACTAATCCAGCATAAACGTAATGTATGTACATTACATTTTATGATCTACTTCATGTGCACGTACATAGTATTAATGTAACAAGGACATAGTATGTATATAGTACATTAAACGATTTTCCACATGCATATTAAGCACGTACATCAGTATTAATGTAATAAGGACATAGTATGTATATTGTACATTAAACGATCTTCCTCATGCATATAAGCATGTACAATGCTCCTATCGGCAGTACATAGTACATTTTACTGCATACTCGTGCATGGCACATGGAGTCAAATCCATTCTCGCCAACATGCGTATCCCGTCCACTAGATCACGAGCTTGTTGACCATGCCGCGTGAAA
>EF617757.1_Mediteranean_Europe
TTCATATAGTTTACTATATATCTACCCTACACATATGCAGTACTAATCCAGCATAAACGTAATGTATGTACATTACATTTTATGATCTACTTCATGTGCACGTACATAATATTAATGTAACAAGGACATAGTATGTATATAGTACATTAAACGATTTTCCACATGCATATTAAGCACGTACATCAGTATTAATGTAATAAGGACATAGTATGTATATCGTACATTAAACGATCTCCCTCATGCATATAAGCATGTACAATACTTCTATCGGCAGTACATAGTACATTTTACTGCATATTCGTACATAGCACATAGAGTCAAATCCATTCTCGTCAACATGCGTATCCCGTCCACTAGATCACGAGCTTGTTGACCATGCCGCGTGAAA
>EF617758.1_Mediteranean_Europe
TTCATATAGTTTACTGTATATCTACCCTACACATATGCAGTACTAATCCAGCATAAACGTAATGTATGTACATTACATTTTATGATCTACTTCATGTGCACGTACATAATATTAATGTAACAAGGACATAGTATGTATATAGTACATTAAACGATTTTCCACATGCATATTAAGCACGTACATCAGTATTAATGTAATAAGGACATAATATGTATATTGTACATTAAACGATCTTCCTCATGCATATAAGCATGTATAATGCCTCTATTGGCAGTACATAGTACATTTTACTGCATATTCGTACATGGCACATAGAGTCAAATCCATTCTTGCCAACATGCGTATCCCGTCCACTAGATCACGAGCTTGTTGACCATGCCGCGTGAAA
>EF617759.1_Mediteranean_Europe
TTCATATAGTTTACTGTATATCTACCCTACACATATGCAGTACTAATCCAGCATAAACGTAATGTATGTACATTACATTTTATGATCTACTTCATGTGCACGTACATAATATTAATGTAACAAGGACATAGTATGTATATAGTACATTAAACGATTTTCCACATGCATATTAAGTACGTACATCAGTATTAATGTAATAAGGACATAATATGTATATTGTACATTAAACGATCTTCCTCATGCATATAAGCATGTACAATGCTTCTATCGACAGTACATAGTACATTTTACTGCATATTCGTACATGGCACATGGAGTCAAATCCATTCTCGCCAACATGCGTATCCCGTCCACTAGATCACGAGCTTGTTGACCATGCCGCGTGAAA
>EF617760.1_Mediteranean_Europe
TTCATATAGTTTACTGTATATCTACCCTACACATATGCAGTACTAATCCAGCATAAACGTAATGTATGTACATTACATTTTATGATCTACTTCATGTGCACGTACATAATATTAATGTAACAAGGACATAGTATGTATATAGTACATTAAACGATTTTCCACATGCATATTAAGCACGTACATCAGTATTAATGTAATAAGGACATAATATGTATACTGTACATTAAACGATCTTCCTCATGCATATAAGCATGTATAATGCTTCTATTGGCAGTACATAGTACATTTTACTGCATACTCGTACATGGCACATAGAGTCAAATCCATTCTTGTCAACATGCGTATCCCGTCCACTAGATCACGAGCTTGTTGACCATGCCGCGTGAAA
>EF617761.1_Mediteranean_Europe
TTCATATAGTTTACTATATATCTACCCTACACATATGCAGTACTAATCCAGCATAAACGTAATGTATGTACATTACATTTTATGATCTACTTCATGTGCACGTACATAATATTAATGTAACAAGGACATAGTATGTATATAGTACATTAAACGATTTTCCACATGCATATTAAGCACGTACATCAGTATTAATGTAATAAGGACATAGTATGTATATTGTACATTAAACGATCTTCCTCATGCATATAAGCATGTACAATGCTTCTATTGGCAGTACATAGTACATTTTACTGCATACTCGTACATGGCACATAGAGTCAAATCCATTCTTGCCAACATGCGTATCCCGTCCACTAGATCACGAGCTTGTTGACCATGCCGCGTGAAA
>EF617740.1_Mediteranean_Europe
TTCATATAGTTTACTGTATATCTACCCTACACATATGCAGTACTAATCCAGCATAAACGTAATGTATGTACATTACATTTTATGATCTACTTCATGTGCACGTACATAATATTAATGTAACAAGGACATAGTATGTATATAGTACATTAAACGATTTTCCACATGCATATTAAGCACGTACATCAGTATTAATGTAATAAGGACATAATATGTATATTGTACATTAAACGATCTTCCTCATGCATATAAGCATGTATAATGCCTCTATTGGCAGTACATAGTACATTTTACTGCATATCCGTACATGGCACATAGAGTCAAATCCATTCTTGCCAACATGCGTATCCCGTCCATTAGATCACGAGCTTGTTGACCATGCCGCGTGAAA
>EF617741.1_Mediteranean_Europe
TTCATATAGTTTACTGTATATCTACCCTACACATATGCAGTACTAATCCAGCATAAACGTAATGTATGTACATTACATTTTATGATCTACTTCATGTGTACGTACATAATATTAATGTAACAAGGACATAGTATGTATATAGTACATTAAACGATTTTCCACATGCATATTAAGCACGTACATCAGTATTAATGTAATAAGGACATAACATGTATATTGTACATTAAACGATCTTCCTCATGCATATAAGCATGTATAACGCTTCCATCGGCAGTACATAGTACATTTTACTGCATATTCGTACATGGCACATAGAGTCAAATCCATTCTTGCCAACATGCGTATCCCGTCCACTAGATCACGAGCTTGTTGACCATGCCGCGTGAAA
>EF617742.1_Mediteranean_Europe
TTCATATAGTTTACTGTATATCTACCCTACACATATGCAGTACTAATCCAGCATAAACGTAATGTATGTACATTACATTTTATGATCTACTTCATGTGCACGTACATAATATTAATGTAACAAGGACATAATATGTATATAGTACATTAAACGATTTTCCACATGCATATTAAGCACGTACATCAGTATTAATGTAATGAGGACATAGTATGTATATCGTACATTAAACGATCTTCCCCATGCATATAAGCATGTACAATACTTCTATCGGCAGTACATAGTACATTTTACTGCATACTCGTACATAGCACATAGAGTCAAATCCATTCTTGTCAACATGCGTATCCCGTCCACTAGATCACGAGCTTGTTGACCATGCCGCGTGAAA
>AA27_sulcis
TTCATATAGTTTACTGTATATCTACCCTACACATATACAGTACTAATCCAGCATAAACGTAATGTATGTACATTACATTTTATGATCTACTTCATGTGTACGTACATAATATTAATGTAACAAGGACATAGTATGTATATAGTACATTAAACGATTTTCCACATGCATATTAAGCACGTACATCAATATTAATGTAATAAGGACATAGTATGTATATTGTACATTAAACGATCTTCCTCATGCATATAAGCATGTATAATGTCTCTATCGGCAGTACATAGTACATTTTACTGCATATTCGTACATGGCACATAGAGTCAAATCCATTCTTGCCAACATGCGTATCCCGTCCACTAGATCACGAGCTTGTTGACCATGCCGCGTGAAA
>AA28_sulcis
TTCATATAGTTTACTGTATATCTACCCTACACATATGCAGTACTAATCCAGCATAAACGTAATGTATGTACATTACATTTTATGATCTACTTCATGTGTACGTACATAATATTAATGTAACAAGGACATAGTATGTATATAGTACATTAAACGATTTTCCACATGCATATTAAGCACGTACATCAGTATTAATGTAATAAGGACATAGTATGTATATTGTACATTAAACGATCTTCCTCATGCATATAAGCATGTATAATATTTCTATCGGCAGTACATAGTACATTTTACTGCATATTCGTACATGGCACATAGAGTCAAATCCATTCTTGCCAACATGCGTATCCCGTCCACTAGATCACGAGCTTGTTGACCATGCCGCGTGAAA
>AA30_sulcis
TTCATATAGTTTACTGTATATCTACCCTACACATATGCAGTACTAATCCAGCATGAACGTAATGTATGTACATTACATTTTATGATCTACTTCATGTGTACGTACATAATATTAATGTAACAAGGACATAGTATGTATATAGTACATTAAACGATTTCCCACATGCATATTAAGCACGTACATCAGTATTAATGTAATAAGGACATAGTATGTATATTGTACATTAAACGATCTTCCTCATGCATATAAGCATGTACAATGTTCCTACCGGCAGTACATAGTACATTTTACTGCATATTCGTACATAGCACATAAAGTCAAATCCATTCTCGCCAACATGCGTATCCCGTCCACTAGATCACGAGCTTGTCGACCATGCCGCGTGAAA
>AC27_sulcis
TTCATATAGTTTACTGTATATCTACCCTACACATATGCAGTACTAATCCAGCATGAACGTAATGTATGTACATTACATTTTATGATCTACTTCATGTGTACGTACATAATATTAATGTAACAAGGACATAGTATGTATATAGTACATTAAACGATTTCCCACATGCATATTAAGCACGTACATCAGTATTAATGTAATAAGGACATAATATGTATATTGTACATTAAACGATCTTCCTCATGCATATAAGCATGTATAATGTTCCTACCGGCAGTACATAGTACATTTTACTGCATATTCGTACATAGCACATAAAGTCAAATCCGTTCTTGCCAACATGCGTATCCCGTCCACTAGATCACGAGCTTGTCGACCATGCCGCGTGAAA
>AC28_sulcis
TTCATATAGTTTACTGTATATCTACCCTACACATATGCAGTACTAATCCAGCATAAACGTAATGTATGTACATTACATTTTATGATCTACTTCATGTGTACGTACATAATATTAATGTAACAAGGACATAGTATGTATATAGTACATTAAACGATTTTCCACATGCATATTAAGCACGTACATTAATATTAATGTAATAAGGACATAGTATGTATATTGTACATTAAACGATCTTCCTCATGCATATAAGCATGTATAACGTCTCTATCGACAGTACATAGTACATTTTACTGCATATTCGTACATGGCACATAGAGTCAAATCCATTCTTGTCAACATGCGTATCCCGTCCACTAGATCACGAGCTTGTTGACCATGCCGCGTGAAA
>AC30_sulcis
TTCATATAGTTTACTGTATATCTACCCTACACATATGCAGTACTAATCCAGCATAAACGTAATGTATGTACATTACATTTTATGATCTACTTCATGTGCACGTACATAGTATTAATGTAACAAGGACATAGTATGTATATAGTACATTAAACGATTTTCCACATGCATATTAAGCACGTACATCAGTATTAATGTAATAAGGACATAGTATGTATATTGTACATTAAACGATCTTCCTCATGCATATAAGCATGTACAATGCTCCTATCGGCAGTACATGGTACATTTTACTGCATACTCGTACATGGCACATGGAGTCAAATCCATTCTCGCCAACATGCGTATCCCGTCCACTAGATCACGAGCTTGTTGACCATGCCGCGTGAAA
>AD27_sulcis
TTCATATAGTTTACTGTATATCTACCCTACACATATGCAGTACTAATCCAGCATAAACGTAATGTATGTACATTACATTTTATGATCTACTTCATGTGCACGTACATAATATTAATGTAACAAGGACATAGTATGTATATAGTACATTAAACGATTTTCCACATGCATATTAAGCACGTACATCAGTATTAATGTAATAAGGACATAATATGTATATTGTACATTAAACGATCTTCCCCATGCATATAAGCATGTATAATGCCTCTATTGGCAGTACATAGTACATCTTACTGCATATTCGTACATGGCACATAGAGTCAAATCCATTCTTGTCAACATGCGTATCCCGTCCACTAGATCACGAGCTTGTTGACCATGCCGCGTGAAA
>AD28_sulcis
TTCATATAGTTTACTATATATCTACCCTACACATATGCAGTACTAACCCAGCATAAACGTAATATATGTACATTACATTTTATGATCTACTTCATGTGCACGTACATAATATTAATGTAACAAGGACATAGTATGTATATAGTACATTAAATGATTTTCCACATGCATATTAAGCACGTATATCAGTATTAATGTAATAAGGACATAGTATGTATATTGTACATTAAACGATCTCCCTCATGCATATAAGCATGTACAATGCTTCTATCGGCAGTACATAGTACATTTTACTGCATATTCGTACATGGCACATAGAGTCAAATCCATTCTCGCCAACATGCGTATCCCGTCCACTAGATCACGAGCTTGTTGACCATGCCGCGTGAAA
>AD29_sulcis
TTCATATAGTTTACTGTATATCTACCCTACACATATGCAGTACTAATCCAGCATAAACGTAATGTATGTACATTACATTTTATGATCTACTTCATGTGCACGTACATAATATTAATGTAATAAGGACATAGTATGTATATAGTACATTAAACGATTTTCCGCATGCATATTAAGCACGTACATCAGTATTAATGTAATAAGGACATAGTATGTATATTGTACATTAAACGATCTTCCCCATGCATATAAGCATGTACAATGCCTCCACCGGCAGTACATAGTACATTTTACTGCATATTCGTACATGGCACATAGAGTCAAATCCATTCTTGTCAACATGCGTATCCCGCCCACTAGATCACGAGCTTGTTGACCATGCCGCGTGAAA
>AD30_sulcis
TTCATATAGTTTACTGTATATCTACCCTACACATATGCAGTACTAATCCAGCATAAACGTAATGTATGTACATTACATTTTATGATCTACTTCATGTGCACGTACATAATATTAATGTAATAAGGACATAGTATGTATATAGTACATTAAACGATTTTCCGCATGCATATTAAGCACGTACATCAGTATTAATGTAATAAGGACATAGTATGTATATTGTACATTAAACGATCTTCCCCATGCATATAAGCATGTACAATGCCTCCACCGGCAGTACATAGTACATTTTACTGCATATTCGTACATGGCACATAGAGTCAAATCCATTCTTGTCAACATGCGTATCCCGCCCACTAGATCACGAGCTTGTTGACCATGCCGCGTGAAA
>BA28_guspinese
TTCATATAGTTTACTGTATATCTACCCTACACATATACAGTACTAATCCAGCATAAACGTAATGTATGTACATTACATTTTATGATCTACTTCATGTGTACGTACATAATATTAATGTAACAAGGACATAGTATGTATATAGTACATTAAACGATTTTCCACATGCATATTAAGCACGTACATCAATATTAATGTAATAAGGACATAGTATGTATATTGTACATTAAACGATCTTCCTCATGCATATAAGCATGTATAATGTTTCTATCGGCAGTACATAGTACATTTTACTGCATATTCGTACATGGCACATAGAGTCAAATCCATTCTTGCCAACATGCGTATCCCGTCCACTAGATCACGAGCTTGTTGACCATGCCGCGTGAAA
>BA29_guspinese
TTCATATAGTTTACTGTATATCTACCCTACACATATGCAGTACTAATCCAGCATGAACGTAATGTATGTACATTACATTTTATGATCTACTTCATGTGTACGTACATAATATTAATGTAACAAGGACATAGTATGTATATAGTACATTAAACGATTTCCCACATGCATATTAAGCACGTACATCAGTATTAATGTAATAAGGACATAGTATGTATATTGTACATTAAACGATCTTCCTCATGCATATAAGCATGTATAATGTTCCTACTGGCAGTACATAGTACATTTTACTGCATATTCGTACATAGCACATAAAGTCAAATCCATTCTTGCCAACATGCGTATCCCGTCCACTAGATCACGAGCTTGTCGACCATGCCGCGTGAAA
>BB28_guspinese
TTCATATAGTTTACTGTATATCTACCCTACACATATACAGTACTAATCCAGCATAAACGTAATGTATGTACATTACATTTTATGATCTACTTCATGTGTACGTACATAATATTAATGTAACAAGGACATAGTATGTATATAGTACATTAAACGATTTTCCACATGCATATTAAGCACGTACATCAATATTAATGTAATAAGGACATAGTATGTATATTGTACATTAAACGATCTTCCTCATGCATATAAGCATGTATAATGTTTCTATCGGCAGTACATAGTACATTTTACTGCATATTCGTACATGGCACATAGAGTCAAATCCATTCTTGCCAACATGCGTATCCCGTCCACTAGATCACGAGCTTGTTGACCATGCCGCGTGAAA
>BB29_guspinese
TTCATATAGTTTACTGTATATCTACCCTACACATATGCAGTACTAATCCAGCATAAACGTAATGTATGTACATTACATTTTATGATCTACTTCATGTGCACGTACATAATATTAATGTAACAAGGACATAGTATGTATATAGTACATTAAACGATTTTCCACATGCATATTAAGCACGTACATCAGTATTAATGTAATAAGGACATAGTATGTATATCGTACATTAAACGATCTTCCCCATGCATATAAGCATGTATAATGCCTCCATTAGCAGTACATAGCACATTTTACTGCATATTCGTACATGGCACATAGAGTCAAATCCGTTCTTGCCAACATGCGTATCCCGTCCACTAGATCACGAGCTTGTTGACCATGCCGCGTGAAA
>BB30_guspinese
TTCATATAGTTTACTGTATATCTACCCTACACATATGCAGTACTAATCCAGCATAAACGTAATGTATGTACATTACATTTTATGATCTACTTCATGTGCACGTACATAATATTAATGTAATAAGGACATAGTATGTATACAGTACATTAAACGATTTTCCGCATGCATATTAAGCACGTACATCAGTATTAATGTAATAAGGACATAGTATGTATATTGTACATTAAACGATCTTCCTCATGCATATAAGCATGTACAATGCCTCCATCGGCAGTACATAGTACATTTTACTGCATATTCGTACATGGCACATAGAGTCAAATCCATTCTTGTCAACATGCGTATCCCGTCCACTAGATCACGAGCTTGTTGACCATGCCGCGTGAAA
>BC27_guspinese
TTCATATAGTTTACTGTATATCTACCCTACACATATGCAGTACTAATCCAGCATAAACGTAATGTATGTACATTACATTTTATGATCTACTTCATGTGCACGTACATAATATTAATGTAATAAGGACATAGCATGTATATAGTACATTAAACGATTTTCCGCATGCATATTAAGCACGTACATCAGTATTAATGTAATAAGGACATAGTATGTATATTGTACATTAAACGATCTTCCTCATGCATATAAGCATGTACAATGCCTTCATCGGCAGTACATAGTACATTTTACTGCATATTCGTACATGGCACATAGAGTCAAATCTATTCTTGTCAACATGCGTATCCCGTCCACTAGATCACGAGCTTGTTGACCATGCCGCGTGAAA
>BC28_guspinese
TTCATATAGTTTACTGTATATCTACCCTACACATATGCAGTACTAATCCAGCATAAACGTAATGTATGTACATTACATTTTATGATCTACTTCATGTGCACGTACATAGTATTAATGTAACAAGGACATAGTATGTATATAGTACATTAAACGATTTTCCACATGCATATTAAGCACGTACATCAGTATTAATGTAATAAGGACATAGTATGTATATTGTACATTAAACGATCTTCCTCATGCATATAAGCATGTACAATGCTCCTATCGGCAGTACATAGTACATTTTACTGCATACTCGTACATGGCACATGGAGTCAAATCCATTCTCGCCAACATGCGTATCCCGTCCACTAGATCACGAGCTTGTTGACCATGCCGCGTGAAA
>BC29_guspinese
TTCATATAGTTTACTGTATATCTACCCTACACATATGCAGTACTAATCCAGCATAAACGTAATGTATGTACATTACATTTTATGATCTACTTCATGTGCACGTACATAGTATTAATGTAACAAGGACATAGTATGTATATAGTACATTAAACGATTTTCCACATGCATATTAAGCACGTACATCAGTATTAATGTAATAAGGACATAGTATGTATATTGTACATTAAACGATCTTCCTCATGCATATAAGCATGTACAATGCTCCTATCGGCAGTACATAGTACATTTTACTGCATACTCGTACATGGCACATGGAGTCAAATCCATTCTCGCCAACATGCGTATCCCGTCCACTAGATCACGAGCTTGTTGACCATGCCGCGTGAAA
>BC30_guspinese
TTCATATAGTTTACTGTATATCTACCCTACACATATGCAGTACTAATCCAGCATAAACGTAATGTATGTACATTACATTTTATGATCTACTTCATGTGTACGTACATAATATTAATGTAACAAGGACATAGTATGTATATAGTACATTAAACGATTTTCCACATGCATATTAAGCACGTACATCAGTATTAATGTAATAAGGACATAACATGTATATTGTACATTAAACGATCTTCCTCATGCATATAAGCATGTATAACGCTTCTATCGGCAGTACATAGTACATTCTACTGCATATTCGTACATGGCACATAGAGTCAAATCCATTCTTGTCAACATGCGTATCCCGTCCACTAGATCACGAGCTTGTTGACCATGCCGCGTGAAA
>BD27_guspinese
TTCATATAGTTTACTGTATATCTACCCTACACATATGCAGTACTAATCCAGCATGAACGTAATGTATGTACATTACATTTTATGATCTACTTCATGTGTACGTACATAATATTAATGTAACAAGGACATAGTATGTATATAGTACATTAAACGATTTTCCACATGCATATTAAGCACGTACATCAGTATTAATGTAATAAGGACATAGTATGTATATCGTACATTAAACGATCTTCCTCATGCATATAAGCATGTATAATGTTCCTACCGGCAGTACATAGTACATTTTACTGCATATTCGTACATAGCACATAAAGTCAAATCCATTCTTGCCAACATGCGTATCCCGTCCACTAGATCACGAGCTTGTCGACCATGCCGCGTGAAA
>CA29_sarrabus
TTCATATAGTTTACTGTATATCTACCCTACACATATGCAGTACTAATCCAGCATGAACGTAATGTATGTACATTACATTTTATGATCTACTTCATGTGTACGTACATAATATTAATGTAACAAGGACATAGTATGTATATAGTACATTAAACGATTTTCCACATGCATATTAAGCACGTACATCAGTATTAATGTAATAAGGACATAATATGTATATCGTACATTAAACGATCTTCCTCATGCATATAAGCATGTATAATGTTCCTACCGGCAGTACATAGTACATTTTACTGCATATTCGTACATAGCACATAAAGTCAAATCCATTCTTGCCAACATGCGTATCCCGTCCACTAGATCACGAGCTTGTCGACCATGCCGCGTGAAA
>CA30_sarrabus
TTCATATAGTTTACTGTATATCTACCCTACACATATGCAGTACTAATCCAGCATGAACGTAATGTATGTACATTACATTTTATGATCTACTTCATGTGTACGTACATAATATTAATGTAACAAGGACATAGTATGTATATAGTACATTAAACGATTTTCCACATGCATATTAAGCACGTACATCAGTATTAATGTAATAAGGACATAATATGTATATCGTACATTAAACGATCTTCCTCATGCATATAAGCATGTATAATGTTCCTACCGGCAGTACATAGTACATTTTACTGCATATTCGTACATAGCACATAAAGTCAAATCCATTCTTGCCAACATGCGTATCCCGTCCACTAGATCACGAGCTTGTCGACCATGCCGCGTGAAA
>CD27_sarrabus
TTCATATAGTTTACTGTATATCTACCCTACACATATGCAGTACTAATCCAGCATAAACGTAATGTATGTACATTACATTTTATGATCTACTTCATGTGTACGTACATAATATTAATGTAACAAGGACATAGTATGTATATAGTACATTAAACGATTTTCCACATGCATATTAAGCACGTACATCAGTATTAATGTAATAAGGACATAATATGTATATTGTACATTAAACGATCTTCCTCATGCATATAAGCATGTATAATACTTCTATCGGCAGTACATAGTACATTTTACTGCATATTCGTACATGGCACATAGAGTCAAATCCATTCTCGCCAACATGCGTATCCCGTCCACTAGATCACGAGCTTGTTGACCATGCCGCGTGAAA
>CD28_sarrabus
TTCATATAGTTTACTGTATATCTACCCTACACATATGCAGTACTAATCCAGCATAAACGTAATGTATGTACATTACATTTTATGATCTACTTCATGTGCACGTACATAATATTAATGTAATAAGGACATAGTATGTATATAGTACATTAAACGATTTTCCGCATGCATATTAAGCACGTACATCAGTATTAATGTAATAAGGACATAGTATGTATATTGTACATTAAACGATCTTCCTCATGCATATAAGCATGTACAATGCCTCCATCGGCAGTACATAGTACATTTTACTGCATATTCGTACATGGCACATAGAGTCAAATCCATTCTTGTCAACATGCGTATCCCGTCCACTAGATCACGAGCTTGTTGACCATGCCGCGTGAAA
>CD29_sarrabus
TTCATATAGTTTACTGTATATCTACCCTACACATATGCAGTACTAATCCAGCATAAACGTAATGTATGTACATTACATTTTATGATCTACTTCATGTGCACGTACATAATATTAATGTAATAAGGACATAGTATGTATATAGTACATTAAACGATTTTCCGCATGCATATTAAGCACGTACATCAGTATTAATGTAATAAGGACATAGTATGTATATTGTACATTAAACGATCTTCCTCATGCATATAAGCATGTACAATGCCTCCATCGGCAGTACATAGTACATTTTACTGCATATTCGTACATGGCACATAGAGTCAAATCCATTCTTGTCAACATGCGTATCCCGTCCACTAGATCACGAGCTTGTTGACCATGCCGCGTGAAA
>CD30_sarrabus
TTCATATAGTTTACTGTATATCTACCCTACACATATGCAGTACTAATCCAGCATAAACGTAATGTATGTACATTACATTTTATGATCTACTTCATGTGCACGTACATAATATTAATGTAATAAGGACATAGTATGTATATAGTACATTAAACGATTTTCCACATGCATATTAAGCACGTACATCAGTATTAATGTAATAAGGACATAATATGTATATTGTACATTAAACGATCTTCCTCATGCATATAAGCATGTACAATGCTTCTATCGGCAGTACATAGTACATTTTACTGCATATTCGTACATGGCACATGGAGTCAAATCCATTCTCGCCAACATGCGTATCCCGTCCACTAGATCACGAGCTTGTTGACCATGCCGCGTGAAA
>DA26_ogliastra
TTCATATAGTTTACTGTATATCTACCCTACACATATGCAGTACTAATCCAGCATAAACGTAATGTATGTACATTACATTTTATGATCTACTTCATGTGCACGTACATAATATTAATGTAATAAGGACATAGTATGTATATAGTACATTAAACGATTTTCCGCATGCATATTAAGCACGTACATCAGTATTAATGTAATAAGGACATAATATGTATATTGTACATTAAACGATCTTCCTCATGCATATAAGCATGTACAATGCCTCCATCGGCAGTACATAGTACATTTTACTGCATATTCGTACATGGCACATAGAGTCAAATCCATTCTTGTCAACATGCGTATCCCGCCCACTAGATCACGAGCTTGTTGACCATGCCGCGTGAAA
>DA27_ogliastra
TTCATATAGTTTACTGTATATCTACCCTACACATATGCAGTACTAATCCAGCATAAACGTAATGTATGTACATTACATTTTATGATCTACTTCATGTGCGCGTACATAATATTAATGTAATAAGGACATAGTATGTATATAGTACATTAAACGATTTTCCGCATGCATATTAAGCACGTACATCAGTATTAATGTAATAAGGACATAGTATGTATATTGTACATTAAACGATCTTCCTCATGCATATAAGCATGTACAATGCCTCCATCGGCAGTACATAGTACATTTTACTGCATATTCGTACATGGCACATAGAGTCAAATCCATTCTTGTCAACATGCGTATCCCGTCCACTAGATCACGAGCTTGTTGACCATGCCGCGTGAAA
>DB27_ogliastra
TTCATATAGTTTACTGTATATCTACCCTACACATATGCAGTACTAATCCAGCATAAACGTAATGTATGTACATTACATTTTATGATCTACTTCATGTGCACGTACATAATATTAATGTAACAAGGACATAGTATGTATATAGTACATTAAACGATTTTCCGCATGCATATTAAGCACGTACATCAGTATTAATGTAATAAGGACATAGTATGTATATTGTACATTAAACGATCTTCCTCATGCATATAAGCATGTACAATGTTTCTATCGGTAGTACATAGTACATTTTACTGCATATTCGTACATGGCACATGAAGTCAAATCCATTCTCGCCAACATGCGTATCCCGTCCACTAGATCACGAGCTTGTTGACCATGCCGCGTGAAA
>DB28_ogliastra
TTCATATAGTTTACTGTATATCTACCCTACACATATGCAGTACTAATCCAGCATAAACGTAATGTATGTACATTACATTTTATGATCTACTTCATGTGCACGTACATAGTATTAATGTAACAAGGACATAGTATGTATATAGTACATTAAACGATTTTCCACATGCATATTAAGCACGTACATCAGTATTAATGTAATAAGGACATAGTATGTATATTGTACATTAAACGATCTTCCTCATGCATATAAGCATGTACAATGCTCCTATCGGCAGTACATAGTACATTTTACTGCATACTCGTACATGGCACATGGAGTCAAATCCATTCTCGCCAACATGCGTATCCCGTCCACTAGATCACGAGCTTGTTGACCATGCCGCGTGAAA
>DB29_ogliastra
TTCATATAGTTTACTGTATATCTACCCTACACATATGCAGTACTAATCCAGCATGAACGTAATGTATGTACATTACATTTTATGATCTACTTCATGTGTACGTACATAATATTAATGTAACAAGGACATAGTATGTATATAGTACATTAAACGATTTCCCACATGCATATTAAGCACGTACATCAGTATTAATGTAATAAGGACATAGTATGTATATTGTACATTAAACGATCTTCCTCATGCATATAAGCATGTATAATGTTCCTACCGGCAGTACATAGTACATTTTACTGCATATTCGTACATAGCACATAAAGTCAAATCCATTCTTGCCAACATGCGTATCCCGTCCACTAGATCACGAGCTTGTCGACCATGCCGCGTGAAA
>DB30_ogliastra
TTCATATAGTTTACTGTATATCTACCCTACACATATGCAGTACTAATCCAGCATAAACGTAATGTATGTACATTACATTTTATGATCTACTTCATGTGTACGTACATAATATTAATGTAACAAGGACATAGTATGTATATAGTACATTAAACGATTTTCCACATGCATATTAAGCGCGTACATCAGTATTAATGTAATAAGGACATAGTATGTATATTGTACATTAAACGATCTTCCTCATGCATATAAGCATGTATAATGTTTCTATCGGCAGTACATAGTACATTTTACTGCATACTCGTACATAGCACATAGAGTCAAATCCATTCTTGCCAACATGCGTATCCCGTCCACTAGATCACGAGCTTGTTGACCATGCCGCGTGAAA
>DC26_ogliastra
TTCATATAGTTTACTGTATATCTACCCTACACATATGCAGTACTAATCCAGCATAAACGTAATGTATGTACATTACATTTTATGATCTACTTCATGTGTACGTACATAATATTAATGTAACAAGGACATAGTATGTATATAGTACATTAAACGATTTTCCACATGCATATTAAGCACGTACATCAGTATTAATGTAATAAGGACATAGTATGTATATTGTACATTAAACGATCTTCCTCATGCATATAAGCATGTATAATATTTCTATCGGCAGTACATAGTACATTTTACTGCATATTCGTACATGGCACATAGGGTCAAATCCATTCTTGTCAACATGCGTATCCCGTCCACTAGATCACGAGCTTGTTGACCATGCCGCGTGAAA
>DC27_ogliastra
TTCATATAGTTTACTGTATATCTACCCTACACATATGCAGTACTAATCCAGCATGAACGTAATGTATGTACATTACATTTTATGATCTACTTCATGTGTACGTACATAATATTAATGTAACAAGGACATAGTATGTATATAGTACATTAAACGATTTCCCACATGCATATTAAGCACGTACATCAGTATTAATGTAATAAGGACATAGTATGTATATTGTACATTAAACGATCTTCCTCATGCATATAAGCATGTATAATGTTCCTACCGGCAGTACATAGTACATTTTACTGCATATTCGTACATAGCACATAAAGTCAAATCCATTCTTGCCAACATGCGTATCCCGTCCACTAGATCACGAGCTTGTCGACCATGCCGCGTGAAA
>DC28_ogliastra
TTCATATAGTTTACTGTATATCTACCCTACACATATGCAGTACTAATCCAGCATAAACGTAATGTATGTACATTACATTTTATGATCTACTTCATGTGCACGTACATAATATTAATGTAACAAGGACATAGTATGTATATAGTACATTAAACGATTTTCCACATGCATATTAAGCACGTACATCAGTATTAATGTAATAAGGACATAATATGTATATTGTACATTAAACGATCTTCCTCATGCATATAAGCATGTATAATGCCTCTATTGGCAGTACATAGTACATTTTACTGCATATTCGTACATGGCACATAGAGTCAAATCCGTTCTTGTCAACATGCGTATCCCGTCCACTAGATCACGAGCTTGTCGACCATGCCGCGTGAAA
>DC29_ogliastra
TTCATATAGTTTACTGTATATCTACCCTACACATATGCAGTACTAATCCAGCATAAACGTAATGTATGTACATTACATTTTATGATCTACTTCATGTGTACGTACATAATATTAATGTAACAAGGACATAGTATGTATATAGTACATTAAACGATTTTCCACATGCATATTAAGCACGTACATCAGTATTAATGTAATAGGGACATAACATGTATATTGTACATTAAACGATCTTCCTCATGCATATAAGCATGTATAACGCTTCTATCGGCAGTACATAGTACATTCTACTGCATATTCGTACATGGCACATAGAGTCAAATCCATTCTTGTCAACATGCGTATCCCGTCCACTAGATCACGAGCTTGTTGACCATGCCGCGTGAAA
>DC30_ogliastra
TTCATATAGTTTACTGTATATCTACCCTACACATATGCAGTACTAATCCAGCATAAACGTAATGTATGTACATTACATTTTATGATCTACTTCATGTGTACGTACATAATATTAATGTAACAAGGACATAGTATGTATATAGTACATTAAACGATTTTCCACATGCATATTAAGCACGTACATCAGTATTAATGTAATAAGGACATAGTATGTATATTGTACATTAAACGATCTTCCTCATGCATATAAGCATGTATAATATTTCTATCGGCAGTACATAGTACATTTTACTGCATATTCGTACATGGCACATAGGGTCAAATCCATTCTTGTCAACATGCGTATCCCGTCCACTAGATCACGAGCTTGTTGACCATGCCGCGTGAAA
>DD27_ogliastra
TTCATATAGTTTACTGTATATCTACCCTACACATATGCAGTACTAATCCAGCATAAACGTAATGTATGTACATTACATTTTATGATCTACTTCATGTGCACGTACATAGTATTAATGTAACAAGGACATAGCATGTATATAGTACATTAAACGATTTTCCACATGCATATTAAGCACGTACATCAGTATTAATGTAATAAGGACATAGTATGTATATTGTACATTAAACGATCTTCCTCATGCATATAAGCATGTACAATGCTCCTATCGGCAGTACATAGTACATTTTACTGCATACTCGTACATGGCACATGGAGTCAAATCCATTCTCGCCAACATGCGTATCCCGTCCATTAGATCACGAGCTTGTTGACCATGCCGCGTGAAA
>DD28_ogliastra
TTCATATAGTTTACTGTATATCTACCCTACACATATGCAGTACTAATCCAGCATAAACGTAATGTATGTACATTACATTTTATGATCTACTTCATGTGCACGTACATAATATTAATGTAACAAGGACATAGTATGTATATAGTACATTAAACGATTTTCCGCATGCATATTAAGCACGTACATCAGTATTAATGTAATAAGGACATAGTATGTATATTGTACATTAAACGATCTTCCTCATGCATATAAGCATGTACAATGTTTCTATCGGTAGTACATAGTACATTTTACTGCATATTCGTACATGGCACATGAAGTCAAATCCATTCTCGCCAACATGCGTATCCCGTCCACTAGATCACGAGCTTGTTGACCATGCCGCGTGAAA
>DD29_ogliastra
TTCATATAGTTTACTGTATATCTACCCTACACATATGCAGTACTAATCCAGCATAAACGTAATGTATGTACATTACATTTTATGATCTACTTCATGTGCACGTACATAATATTAATGTAATAAAGACATAGTATGTATATAGTACATTAAACGATTTTCCGCATGCATATTAAGCACGTACATCAATATTAATGTAATAAGGACATAGTATGTATATCGTACATTAAACGATCTTCCTCATGCATATAAGCATGCACAATGCCTCCATCGGCAGTACATAGTACATTTTATTGCATATTCGTACATGGTACATAGAGTCAAATCCATTCTTGTCAACATGCGTATCCCGTCCACTAGATCACGAGCTTGTTGACCATGCCGCGTGAAA
>DD30_ogliastra
TTCATATAGTTTACTGTATATCTACCCTACACATATGCAGTACTAATCCAGCATAAACGTAATGTATGTACATTACATTTTATGATCTACTTCATGTGCACGTACATAGTATTAATGTAACAAGGACATAGTATGTATATAGTACATTAAACGATTTTCCACATGCATATTAAGCACGTACATCAGTATTAATGTAATAAGGACATAGTATGTATATTGTACATTAAACGATCTTCCCCATGCATATAAGCATGTACAATGCTCCTATCGGCAGTACATAGTACATTTTACTGCATACTCGTACATGGCACATGGAGTCAAATCCATTCTCGCCAACATGCGTATCCCGTCCACTAGATCACGAGCTTGTTGACCATGCCGCGTGAAA
>EB26_nuorese
TTCATATAGTTTACTGTATATCTACCCTACACATATGCAGTACTAATCCAGCATAGACGTAATGTATGTACATTACATTTTATGATCTACTTCATGTGTACGTACATAATATTAATGTAACAAGGACATAGTATGTATATAGTACATTAAACGATTTTCCACATGCATATTAAGCGCGTACATCAGTATTAATGTAATAAGGACATAGTATGTATATCGTACATTAAACGATCTTCCTCATGCATATAAGCATGTATAATGTTTCTATCGGCAGTACATAGTACATTTTACTGCATATTCGTACATGGCACATAGAGTCAAATCCATTCTTGCCAACATGCGTATCCCGTCCACTAGATCACGAGCTTGTTGACCATGCCGCGTGAAA
>EC27_nuorese
TTCATATAGTTTACTGTATATCTACCCTACACATATGCAGTACTAATCCAGCATAAACGTAATGTATGTACATTACATTTTATGATCTACTTCATGTGCACGTACATAATATTAATGTAATAAGGACATAGTATGTATATAGTACATTAAACGATTTTCCGCATGCATATTAAGCACGTACATCAGTATTAATGTAATAAGGACATAATATGTATATTGTACATTAAACGATCTTCCTCATGCATATAAGCATGTACAATGCCTCCATCGGCAGTACATAGTACATTTTACTGCATATTCGTACATGGCACATAGAGTCAAATCCATTCTTGTCAACATGCGTATCCCGCCCACTAGATCACGAGCTTGTTGACCATGCCGCGTGAAA
>EC28_nuorese
TTCATATAGCTTACTGTATATCTACCCTACACATATGCAGTACTAGTCCAGCATAAACGTAATGTATGTACATTACATTTTATGATCTACTTCATGTGTACGTACATAATATTAATGTAACAAGGACATAGTATGTATATAGTACATTAAACGATTTTCCACATGCATATTAAGCACGTACATCAGTATTAATGTAATAAGGACATAGTATGTATATTGTACATTAAACGATCTTCCTCATGCATATAAGCATGTACAATATTTCTATCGGCAGTACATAGTACATTTTACTGCATATTCGTACATGGCACATAGGGTCAAATCCATTCTTGCCAACATGCGTATCCCGTCCACTAGATCACGAGCTTGTTGACCATGCCGCGTGAAA
>EC29_nuorese
TTCATATAGTTTACTGTATATCTACCCTACACATATGCAGTACTAATCCAGCATAAACGTAATGTATGTACATTACATTTTATGATCTACTTCATGTGCACGTACATAATATTAATGTAATAAGGACATAGTATGTATATAGTACATTAAACGATTTTCCGCATGCATATTAAGCACGTACATCAGTATTAATGTAATAAGGACATAGTATGTATATTGTACATTAAACGATCTTCCTCATGCATATAAGCATGTACAATGCCTCCATCGGCAGTACATAGTACATTTTACTGCATATTCGTACATGGCACATAGAGTCAAATCCATTCTTGTCAACATGCGTATCCCGTCCACTAGATCACGAGCTTGTTGACCATGCCGCGTGAAA
>EC30_nuorese
TTCATATAGTTTACTGTATATCTACCCTACACATATGCAGTACTAATCCAGCATAAACGTAATGTATGTACATTACATTTTATGATCTACTTCATGTGCACGTACATAATATTAATGTAATAAGGACATAGTATGTATATAGTACATTAAACGATTTTCCGCATGCATATTAAGCACGTACATCAGTATTAATGTAATAAGGACATAGTATGTATATTGTACATTAAACGATCTTCCTCATGCATATAAGCATGTACAATGCCTCCATCGGCAGTACATAGTACATTTTACTGCATATTCGTACATGGCACATAGAGTCAAATCCATTCTTGTCAACATGCGTATCCCGTCCACTAGATCACGAGCTTGTTGACCATGCCGCGTGAAA
>ED27_nuorese
TTCATATAGTTTACTATATATCTACCCTACATATATGCAGTACTAATCCAACATAAACATAATGTATGTACATTACATTTTATGGTCTACTTCACGTGTACGTACATAACATTAATGTAACAAGGACATAATATGTATATAGTACATTAGATGGTTTCCCACATGCATATTAAGCACGTACATCAGTATTAATGTAGTAAGGACATAATATGTATATCGTACATTAAACGATCTTCCCCATGCATATAAGCATGTACAATATCCCTATTGATAGTACATAGCACATTCTATTGTATACTCGTACATAGCGCATGAAGTCAAATCCGTCCTCGTCAACATGCGTATCCCGTCCACTAGATCACGAGCTTGTTCACCATGCCGCGTGAAA
>FA26_baronia
TTCATATAGTTTACTGTATATCTACCCTACACATATGCAGTACTAATCCAGCATAAACGTAATGTATGTACATTACATTTTATGATCTACTTCATGTGTACGTACATAATATTAATGTAACAAGGACATAGTATGTATATAGTACATTAAACGATTTTCCACATGCATATTAAGCACGTACATCAGTATTAATGTAATAAGGACATAACATGTATATTGTACATTAAACGATCTTCCTCATGCATATAAGCATGTATAACGCTTCTATCGGCAGTACATAGTACATTCTACTGCATATTCGTACATGGCACATAGAGTCAAATCCATTCTTGTCAACATGCGTATCCCGTCCACTAGATCACGAGCTTGTTGACCATGCCGCGTGAAA
>FA27_baronia
TTCATATAGTTTACTGTATATCTACCCTACACATATGCAGTACTAATCCAGCATGAACGTAATGTATGTACATTACATTTTATGATCTACTTCATGTGTACGTACATAATATTAATGTAACAAGGACATAGTATGTATATAGTACATTAAACGATTTCCCACATGCATATTAAGCACGTACATCAGTATTAATGTAATAAGGACATAGTATGTATATTGTACATTAAACGATCTTCCTCATGCATATAAGCATGTATAATGTTCCTACCGGCAGTACATAGTACATTTTACTGCATATTCGTACATGGCACATAAAGTCAAATCCATTCTTGCCAACATGCGTATCCCGTCCACTAGATCACGAGCTTGTCGACCATGCCGCGTGAAA
>FA28_baronia
TTCATATAGTTTACTGTATATCTACCCTACACATATGCAGTACTAATCCAGCATAAACGTAATGTATGTACATTACATTTTATGATCTACTTCATGTGCACGTACATAATATTAATGTAATAAGGACATAGTATGTATATAGTACATTAAACGATTTTCCGCATGCATATTAAGCACGTACATCAGTATTAATGTAATAAGGACATAGTATGTATATTGTACATTAAACGATCTTCCCCATGCATATAAGCATGTACAATGCCTCCATCGGCAGTACATAGTACATTTTACTGCATATTCGTACATGGCACATAGAGTCAAATCCATTCTTGTCAACATGCGTATCCCGCCCACTAGATCACGAGCTTGTTGACCATGCCGCGTGAAA
>FA29_baronia
TTCATATAGTTTACTGTATATCTACCCTACACATATGCAGTACTAATCCAGCATAAACGTAATGTATGTACATTACATTTTATGATCTACTTCATGTGCACGTACATAATATTAATGTAACAAGGACATAGTATGTATATAGTACATTAAACGATTTTCCACATGCATATTAAGCACGTACATCAGTATTAATGTAATAAGGACATAATATGTATATTGTACATTAAACGATCTTCCCCATGCATATAAGCATGTATAATGCCTCTATTGGCAGTACATAGTACATTTTACTGCATATTCGTACATGGCACATAGAGTCAAATCCATTCTTGCCAACATGCGTATCCCGTCCACTAGATCACGAGCTTGTTGACCATGCCGCGTGAAA
>FA30_baronia
TTCATATAGTTTACTGTATATCTACCCTACACATATGCAGTACTAATCCAGCATAAACGTAATGTATGTACATTACATTTTATGATCTACTTCATGTGCACGTACATAGTATTAATGTAACAAGGACATAGTATGTATATAGTACATTAAACGATTTTCCACATGCATATTAAGCACGTACATCAGTATTAATGTAATAAGGACATAGTATGTATATTGTACATTAAACGATCTTCCTCATGCATATAAGCATGTACAATGCTCCTATCGGCAGTACATAGTACATTTTACTGCATACTCGTACATGGCACATGGAGTCAAATCCATTCTCGCCAACATGCGTATCCCGTCCACTAGATCACGAGCTTGTTGACCATGCCGCGTGAAA
>FC27_baronia
TTCATATAGTTTACTGTATATCTACCCTACACATATGCAGTACTAATCCAGCATGAACGTAATGTATGTACATTACATTTTATGATCTACTTCATGTGTACGTACATAATATTAATGTAACAAGGACATAGTATGTATATAGTACATTAAACGATTTCCCACATGCATATTAAGCACGTACATCAGTATTAATGTAATAAGGACATAGTATGTATATTGTACATTAAACGATCTTCCTCATGCATATAAGCATGTACAATGTTCCTACCGGCAGTACATAGTACATTTTACTGCATATTCGTACATAGCACATAAAGTCAAATCCATTCTCGCCAACATGCGTATCCCGTCCACTAGATCACGAGCTTGTCGACCATGCCGCGTGAAA
>FC28_baronia
TTCATATAGTTTACTGTATATCTACCCTACACATATGCAGTACTAATCCAGCATAAACGTAATGTATGTACATTACATTTTATGATCTACTTCATGTGCACGTACATAATATTAATGTAACAAGGACATAATATGTATATAGTACATTAAACGATTTTCCACATGCATATTAAGCACGTACATCAGTATTAATGTAATAAGGACATAGTATGTATATTGTACATTAAACGATCTTCCCCATGCATATAAGCATGTATAATGTCTCTATTGGCAGTACATAGTACATTTTACTGCATATTCGTACATGGCACATAGAGTCAAATCCATTCTTGCCAACATGCGTATCCCGTCCACTAGATCACGAGCTTGTTGACCATGCCGCGTGAAA
>FC29_baronia
TTCATATAGTTTACTGTATATCTACCCTACACATATGCAGTACTAATCCAGCATGAACGTAATGTATGTACATTACATTTTATGATCTACTTCATGTGTACGTACATAATATTAATGTAACAAGGACATAGTATGTATATAGTACATTAAACGATTTCCCACATGCATATTAAGCACGTACATCAGTATTAATGTAATAAGGACATAGTATGTATATTGTACATTAAACGATCTTCCTCATGCATATAAGCATGTACAATGTTCCTACCGGCAGTACATAGTACATTTTACTGCATATTCGTACATAGCACATAAAGTCAAATCCATTCTCGCCAACATGCGTATCCCGTCCACTAGATCACGAGCTTGTCGACCATGCCGCGTGAAA
>NA26_ogliastra
TTCATATAGTTTACTGTATATCTACCCTACACATATGCAGTACTAATCCAGCATAAACGTAATGTATATACATTACATTTTATGATCTACTTCATGTGCACGTACATAATATTAATGTAACAAGGACATAGTATGTATATAGTACATTAAACGATTTTCCACATGCATATTAAGCACGTACATCAGTATTAATGTAATAAGGACATAATATGTATATTGTACATTAAACGATCTTCCTCATGCATATAAGCATGTATAATGCCTCTATTGGCAGTACATAGTACATTTTACTGCATATTCGTACATGGCACATAGAGTCAAATCCATTCTTGCCAACATGCGTATCCCGTCCACTAGATCACGAGCTTGTTGACCATGCCGCGTGAAA
>NA27_ogliastra
TTCATATAGTTTACTGTATATCTACCCTACACATATGCAGTACTAATCCAGCATAAACGTAATGTATGTACATTACATTTTATGATCTACTTCATGTGCACGTACATAATATTAATGTAACAAGGACATAGTATGTATATAGTACATTAAACGATTTTCCACATGCATATTAAGCACGTACATCAGTATTAATGTAATAAGGACATAATATGTATATTGTACATTAAACGATCTTCCTCATGCATATAAGCATGTATAATGCCTCTATTGGCAGTACATAGTACATTTTACTGCATATTCGTACATGGCACATAGAGTCAAATCCATTCTTGCCAACATGCGTATCCCGTCCACTAGATCACGAGCTTGTTGACCATGCCGCGTGAAA
>NA28_ogliastra
TTCATATAGTTTACTGTATATCTACCCTACACATATGCAGTACTAATCCAGCATAAACGTAATGTATGTACATTACATTTTATGATCTACTTCATGTGCACGTACATAGTATTAATGTAACAAGGACATAGTATGTATATAGTACATTAAACGATTTTCCACATGCATATTAAGCACGTACATCAGTATTAATGTAATAAGGACATAGTATGTATATTGTACATTAAACGATCTTCCTCATGCATATAAGCATGTACAATGCTCCTATCGGCAGTACATAGTACATTTTACTGCATACTCGTACATAGCACATGGAGTCAAATCCATTCTCGCCAACATGCGTATCCCGTCCACTAGATCACGAGCTTGTTGACCATGCCGCGTGAAA
>NA29_ogliastra
TTCATATAGTTTACTGTATATCTACCCTACACATATGCAGTACTAATCCAGCATAAACGTAATGTATGTACATTACATTTTATGATCTACTTCATGTGCACGTACATAATATTAATGTAATAAGGGCATAGTATGTATATAGTACATTAAACGATTTTCCGCATGCATATTAAGCACGTACATCAGTATTAATGTAATAAGGACATAATATGTATATTGTACATTAAACGATCTTCCTCATGCATATAAGCATGTACAATGCCTCCATCGGCAGTACATAGTACATTTTACTGCATATTCGTACATGGCACATAAAGTCAAATCCATTCTTGTCAACATGCGTATCCCGCCCACTAGATCACGAGCTTGTTGACCATGCCGCGTGAAA
>NB27_nuorese
TTCATATAGTTTACTGTATATCTACCCTACACATATACAGTACTAATCCAGCATAAACGTAATGTATGTACATTACATTTTATGATCTACTTCATGTGTACGTACATAATATTAATGTAACAAGGACATAGTATGTATATAGTACATTAAACGATTTTCCACATGCATATTAAGCACGTACATCAATATTAATGTAATAAGGACATAGTATGTATATCGTACATTAAACGATCTTCCTCATGCATATAAGCATGTATAATGCTTCTATCGGCAGTACATAGTACATTTTACTGCATATTCGTACATGGCACATAGAGTCAAATCCATTCTTGCCAACATGCGTATCCCGTCCACTAGATCACGAGCTTGTTGACCATGCCGCGTGAAA
>NB28_nuorese
TTCATATAGTTTACTATATATCTACCCTACACATATGCAGTACTAATCCAGCATAAACGTAATGTATGTACATTACATTTTATGATCTACTTCATGTGCACGTACATAATATTAATGTAACAAGGACATAGTATGTATATAGTACATTAAACGATTTTCCACATGCATATTAAGCACGTACATCAGTATTAATGTAATAAGGACATAGTATGTATATTGTACATTAAACGATCTTCCTCATGCATATAAGCATGTACAATGCTTCTATCGGCAGTACATAGTACATTTTACTGCATATTCGTACATGGCACATAGAGTCAAATCCATTCTCGCCAACATGCGTATCCCGTCCACTAGATCACGAGCTTGTTGACCATGCCGCGTGAAA
>NB29_nuorese
TTCATATAGTTTACTGTATATCTACCCTACACATATGCAGTACTAATCCAGCATAAACGTAATGTATGTACATTACATTTTATGATCTACTTCATGTGCACGTACATAATATTAATGTAATAAGGACATAGTATGTATATAGTACATTAAACGATTTTCCGCATGCATATTAAGCACGTACATCAATATTAATGTAATAAGGACATAGTATGTATATTGTACATTAAACGATCTTCCTCATGCATATAAGCATGTACAATGCCTCCATCGGCAGTACATAGTACATTTTACTGCATATTCGTACATGGCACATAGAGTCAAATCCATTCTTGTCAACATGCGTATCCCGTCCACTAGATCACGAGCTTGTTGACCATGCCGCGTGAAA
>NC27_barbagia
TTCATATAGTTTACTGTATATCTACCCTACACATATGCAGTACTAATCCAGCATAAACGTAATGTATGTACATTACATTTTATGATCTACTTCATGTGCGCGTACATAATATTAATGTAATAAGGACATAGTATGTATATAGTACATTAAACGATTTTCCGCATGCATATTAAGCACGTACATCAGTATTAATGTAATAAGGACATAGTATGTATATTGTACATTAAACGATCTTCCTCATGCATATAAGCATGTACAATGCCTCCATCGGCAGTACATAGTACATTTTACTGCATATTCGTACATGGCACATAGAGTCAAATCCATTCTTGTCAACATGCGTATCCCGTCCACTAGATCACGAGCTTGTTGACCATGCCGCGTGAAA
>NC28_barbagia
TTCATATAGTTTACTGTATATCTACCCTACACATATGCAGTACTAATCCAGCATAAACGTAATGTATGTACATTACATTTTATGATCTACTTCATGTGTACGTACATAATATTAATGTAACAAGGACATAGTATGTATATAGTACATTAAACGATTTTCCACATGCATATTAAGCACGTACATCAGTATTAATGTAATAAGGACATAATATGTATATTGTACATTAAACGATCTTCCTCATGCATATAAGCATGTATAATACTTCTATCGGCAGTACATAGTACATTTTACTGCATATTCGTACATGGCACATAGAGTCAAATCCATTCTTGCCAACATGCGTATCCCGTCCACTAGATCACGAGCTTGTTGACCATGCCGCGTGAAA
>ND26_barbagia
TTCATATAGTTTACTGTATATCTACCCTACACATATGCAGTACTAATCCAGCATAAACGTAATGTATGTACATTACATTTTATGATCTACTTCATGTGTACGTACATAATATTAATGTAACAAGGACATAGTATGTATATAGTACATTAAACGATTTTCCACATGCATATTAAGCACGTACATCAGTATTAATGTAATAAGGACATAGTATGTATATTGTACATTAAACGATCTTCCTCATGCATATAAGCATGTATAATACTTCTATCGGCAGTACATAGTACATTTTACTGCATATTCGTACATGGCACATAGGGTCAAATCCATTCTTGCCAACATGCGTATCCCGTCCACTAGATCACGAGCTTGTTGACCATGCCGCGTGAAA
>ND30_barbagia
TTCATATAGTTTACTGTATATCTACCCTACACATATGCAGTACTAATCCAGCATAAACGTAATGTATGTACATTACATTTTATGATCTACTTCATGTGCACGTACATAATATTAATGTAACAAGGACATAGTATGTATATAGTACATTAAACGATTTTCCACATGCATATTAAGCACGTACATCAGTATTAATGTAATAAGGACATAGTATGTATATTGTACATTAAACGATCTTCCTCATGCATATAAGCATGTATAATGCCTCCATTGGCAGTACATAGTACATTTTACTGCATACTCGTACATGGCACATAGAGTCAAATCCATTCTTGCCAACATGCGTATCCCGTCCACTAGATCACGAGCTTGTTGACCATGCCGCGTGAAA
>ND31_barbagia
TTCATATAGTTTACTATATATCTACCCTACATATATGCAGTACTAATCCAACATAAACATAATGTATGTACATTACATTTTATGGTCTACTTCACGTGTACGTACATAACATTAATGTAACAAGGACATAATATGTATATAGTACATTAGATGGTTTCCCACATGCATATTAAGTACGTACATCAGTATTAATGTAGTAAGGACATAATATGTATATTGTACATTAAACGATCTTCCCCATGCATATAAGCATGTACAATATCCCTATTGATAGTACATAGCACATTCTATTGTATACCCGTACATAGCGCATGAAGTCAAATCCGTCCTCGTCAACATGCATATCCCGTCCACTAGATCACGAGCTTGTTCACCATGCCGCGTGAAA
>NE27_nuorese
TTCATATAGTTTACTGTATATCTACCCTACACATATGCAGTACTAATCCAGCATAAACGTAATGTATGTACATTACATTTTATGATCTACTTCATGTGTACGTACATAATATTAATGTAACAAGGACATAATATGTATATAGTACATTAAACGATTTTCCACATGCATATTAAGCACGTACATCAGTATTAATGTAATAAGGACATAACATGTATATCGTACATTAAACGATCTTCCTCATGCATATAAGCATGTATAACACTTCTATCGGCAGTACATAGTACATTTTACTGCATATTCGTACATGGCACATAGAGTCAAATCCATTCTTGTCAACATGCGTATCCCGTCCACTAGATCACGAGCTTGTTGACCATGCCGCGTGAAA
>NF27_baronia
TTCATATAGTTTACTGTATATCTACCCTACACATATGCAGTACTAATCCAGCATAAACGTAATGTATGTACATTACATTTTATGATCTACTTCATGTGCACGTACATAATATTAATGTAACAAGGACATAGTATGTATATAGTACATTAAACGATTTTCCGCATGCATATTAAGCACGTACATCAATATTAATGTAATAAGGACATAGTATGTATATCGTACATTAAACGATCTTCCCCATGCATATAAGCATGTATAATGTCTCCATTAGCAGTACATAGTACATTTTACTGCATATTCGTGCATGGCACATAGAGTCAAATCCGTTCTTGCCAACATGCGTATCCCGTCCACTAGATCACGAGCTTGTTGACCATGCCGCGTGAAA
>NF30_baronia
TTCATATAGTTTACTGTATATCTACCCTACACATATGCAGTACTAATCCAGCATAAACGTAATGTATGTACATTACATTTTATGATCTACTTCATGTGTACGTACATAATATTAATGTAACAAGGACATAGTATGTATATAGTACATTAAACGATTTTCCACATGCATATTAAGCACGTACATTAGTATTAATGTAATAGGGACATAACATGTATATTGTACATTAAACGATCTTCCTCATGCATATAAGCATGTATAACGCTTCTATCGGCAGTACATAGTACATTCTACTGCATATTCGTACATGGCACATAGAGTCAAATCCATTCTTGTCAACATGCGTATCCCGTCCACTAGATCACGAGCTTGTTGACCATGCCGCGTGAAA
>NG27_barbagia
TTCATATAGTTTACTGTATATCTACCCTACACATATGCAGTACTAATCCAGCATAAACGTAATGTATGTACATTACATTTTATGATCTACTTCATGTGCACGTACATAGTATTAATGTAACAAGGACATAGTATGTATATAGTACATTAAACGATTTTCCACATGCATATTAAGCACGTACATCAGTATTAATGTAATAAGGACATAATATGTATATTGTACATTAAACGATCTTCCTCATGCATATAAGCATGTACAATGCTCCTATCGGCAGTACATAGTACATTTTACTGCATACTCGTACATGGCACATGGAGTCAAATCCATTCTCGCCAACATGCGTATCCCGTCCACTAGATCACGAGCTTGTTGACCATGCCGCGTGAAA
>NG28_barbagia
TTCATATAGTTTACTGTATATCTACCCTACACATATGCAGTACTAATCCAGCATAAACGTAATGTATGTACATTACATTTTATGATCTACTTCATGTGCACGTACATAATATTAATGTAACAAGGACATAATATGTATATAGTACATTAAACGATTTTCCACATGCATATTAAGCACGTACATCAGTATTAATGTAATAAGGACATAGTATGTATATTGTACATTAAACGATCTTCCCCATGCATATAAGCATGTATAATGTCTCTATTGGCAGTACATAGTACATTTTACTGCATATTCGTACATGGCACATAGAGTCAAATCCATTCTTGCCAACATGCGTATCCCGTCCACTAGATCACGAGCTTGTTGACCATGCCGCGTGAAA
>NG29_barbagia
TTCATATAGTTTACTGTATATCTACCCTACACATATGCAGTACTAATCCAGCATAAACGTAATGTATATACATTACATTTTATGATCTACTTCATGTGCACGTACATAATATTAATGTAACAAGGACATAGTATGTATATAGTACATTAAACGATTTTCCACATGCATATTAAGCACGTACATCAGTATTAATGTAATAAGGACATAATATGTATATTGTACATTAAACGATCTTCCTCATGCATATAAGCATGTATAATGTCTCTATTGGCAGTACATAGTACATTTTACTGCATATTCGTACATGGCACATAGAGTCAAATCCATTCTTGCCAACATGCGTATCCCGTCCACTAGATCACGAGCTTGTTGACCATGCCGCGTGAAA
>NG30_barbagia
TTCATATAGTTTACTGTATATCTACCCTACACATATGCAGTACTAATCCAGCATAAACGTAATGTATGTACATTACATTTTATGATCTACTTCATGTGCACGTACATAATATTAATGTAATAAGGACATAGTATGTATATAGTACATTAAACGATTTTCCGCATGCATATTAAGCACGTACATCAGTATTAATGTAATAAGGACATAGTATGTATATTGTACATTAAACGATCTTCCTCATGCATATAAGCATGTACAATGCTTCCATCGGCAGTACATAGTACATTTTACTGCATATTCGTACATGGCACATAGAGTCAAATCCATTCTTGTCAACATGCGTATCCCGTCCACTAGATCACGAGCTTGTTGACCATGCCGCGTGAAA
>NG31_barbagia
TTCATATAGTTTACTGTATATCTACCCTACACATATGCAGTACTAATCCAGCATGAACGTAATGTATGTACATTACATTTTATGATCTACTTCATGTGTACGTACATAATATTAATGTAACAAGGACATAGTATGTATATAGTACATTAAACGATTTCCCACATGCATATTAAGCACGTACATCAGTATTAATGTAATAAGGACATAGTATGTATATTGTACATTAAACGATCTTCCTCATGCATATAAGCATGTATAATGTTCCTACCGGCAGTACATAGTACATTTCACTGCATATTCGTACATAGCACATAAAGTCAAATCCATTCTTGTCAACATGCGTATCCCGTCCACTAGATCACGAGCTTGTCGACCATGCCGCGTGAAA
>NI28_nuorese
TTCATATAGTTTACTGTATATCTACCCTACACATATGCAGTACTAATCCAGCATAAACGTAATGTATGTACATTACATTTTATGATCTACTTCATGTGTACGTACATAATATTAATGTAACAAGGACATAGTATGTATATAGTACATTAAACGATTTTCCACATGCATATTAAGCACGTACATCAGTATTAATGTAATAAGGACATAATATGTATATTGTACATTAAACGATCTTCCTCATGCATATAAGCATGTATAATATTTCTATCGGCAGTACATAGTACATTTTACTGCATATTCGTACATGGCACATAGGGTCAAATCCATTCTTGCCAACATGCGTATCCCGTCCACTAGATCACGAGCTTGTTGACCATGCCGCGTGAAA
>NI30_nuorese
TTCATATAGTTTACTGTATATCTACCCTACACATATGCAGTACTAATCCAGCATAAACGTAATGTATGTACATTACATTTTATGATCTACTTCATGTGTACGTACATAATATTAATGTAACAAGGACATAGTATGTATATAGTACATTAAACGATTTTCCACATGCATATTAAGCACGTACATCAGTATTAATGTAATAGGGACATAACATGTATATTGTACATTAAACGATCTTCCTCATGCATATAAGCATGTATAATGCTTCTATCGGCAGTACATAGTACATTCTACTGCATATTCGTACATGGCACATAGAGTCAAATCCATTCTTGTCAACATGCGTATCCCGTCCACTAGATCACGAGCTTGTTGACCATGCCGCGTGAAA
>PS0141_iglesiente
TTCATATAGTTTACTGTATATCTACCCTACACATATGCAGTACTAATCCAGCATAAACGTAATGTATGTACATTACATTTTATGATCTACTTCATGTGTACGTACATAATATTAATGTAACAAGGACATAGTATGTATATAGTACATTAAACGATTTTCCACATGCATATTAAGCACGTACATCAGTATTAATGTAATAGGGACATAACATGTATATTGTACATTAAACGATCTTCCTCATGCATATAAGCATGTATAACGCTTCTATCGGCAGTACATAGTACATTCTACTGCATATTCGTACATGGCACATAGAGTCAAATCCATTCTTGTCAACATGCGTATCCCGTCCACTAGATCACGAGCTTGTTGACCATGCCGCGTGAAA
>PS0142_iglesiente
TTCATATAGTTTACTGTATATCTACCCTACACATATGCAGTACTAATCCAGCATAAACGTAATGTATGTACATTACATTTTATGATCTACTTCATGTGCACGTACATAGTATTAATGTAACAAGGACATAATATGTATATAGTACATTAAACGATTTTCCACATGCATATTAAGCACGTACATCAGTATTAATGTAATAAGGACATAGTATGTATATTGTACATTAAACGATCTTCCTCATGCATATAAGCATGTACAATGCTCCTATCGGCAGTACATAGTACATTTTACTGCATACTCGTACATGGCACATGGAGTCAAATCCATTCTCGCCAACATGCGTATCCCGTCCACTAGATCACGAGCTTGTTGACCATGCCGCGTGAAA
>PS0143_iglesiente
TTCATATAGTTTACTGTATATCTACCCTACACATATGCAGTACTAATCCAGCATGAACGTAATGTATGTACATTACATTTTATGATCTACTTCATGTGTACGTACATAATATTAATGTAACAAGGACATAGTATGTATATAGTACATTAAACGATTTCCCACATGCATATTAAGCACGTACATCAGTATTAATGTAATAAGGACATAGTATGTATATTGTACATTAAACGATCTTCCTCATGCATATAAGCATGTACAATGTTCCTACCGGCAGTACATAGTACATTTTACTGCATATTCGTACATAGCACATAAAGTCAAATCCATTCTTGCCAACATGCGTATCCCGTCCACTAGATCACGAGCTTGTCGACCATGCCGCGTGAAA
>PS0144_iglesiente
TTCATATAGTTTACTGTATATCTACCCTACACATATGCAGTACTAATCCAGCATAAACGTAATGTATGTACATTACATTTTATGATCTACTTCATGTGCACGTACATAGTATTAATGTAACAAGGACATAATATGTATATAGTACATTAAACGATTTTCCACATGCATATTAAGCACGTACATCAGTATTAATGTAATAAGGACATAGTATGTATATTGTACATTAAACGATCTTCCTCATGCATATAAGCATGTACAATGCTCCTATCGGCAGTACATAGTACATTTTACTGCATACTCGTACATGGCACATGGAGTCAAATCCATTCTCGCCAACATGCGTATCCCGTCCACTAGATCACGAGCTTGTTGACCATGCCGCGTGAAA
>PS0145_iglesiente
TTCATATAGTTTACTGTATATCTACCCTACACATATGCAGTACTAATCCAGCATAAACGTAATGTATGTACATTACATTTTATGATCTACTTCATGTGTACGTACATAATATTAATGTAACAAGGACATAGTATGTATATAGTACATTAAACGATTTTCCACATGCATATTAAGCACGTACATCAGTATTAATGTAATAAGGACATAGTATGTATATCGTACATTAAACGATCTTCCTCATGCATATAAGCATGTACAATATTTCTATCGGCAGTACATAGTACATTTTACTGCATATTCGTACATGGCACATAGGGTCAAATCCATTCTTGTCAACATGCGTATCCCGTCCACTAGATCACGAGCTTGTTGACCATGCCGCGTGAAA
>PS0242_sulcis
TTCATATAGTTTACTGTATATCTACCCTACACATATGCAGTACTAATCCAGCATAAACGTAATGTATGTACATTACATTTTATGATCTACTTCATGTGCACGTACATAGTATTAATGTAACAAGGACATAGTATGTATATAGTACATTAAACGATTTTCCACATGCATATTAAGCACGTACATCAGTATTAATGTAATAAGGACATAGTATGTATATTGTACATTAAACGATCTTCCTCATGCATATAAGCATGTACAATGCTCCTATCGGCAGTACATAGTACATTTTACTGCATACTCGTACATGGCACATGGAGTCAAATCCATTCTCGCCAACATGCGTATCCCGTCCACTAGATCACGAGCTTGTTGACCATGCCGCGTGAAA
>PS0243_sulcis
TTCATATAGTTTACTGTATATCTACCCTACACATATACAGTACTAATCCAGCATAAACGTAATGTATGTACATTACATTTTATGATCTACTTCATGTGTACGTACATAATATTAATGTAACAAGGACATAGTATGTATATAGTACATTAAACGATTTTCCACATGCATATTAAGCACGTACATCAATATTAATGTAATAAGGACATAGTATGTATATTGTACATTAAACGATCTTCCTCATGCATATAAGCATGTATAATGTTTCTATCGGCAGTACATAGTACATTTTACTGCATATTCGTACATGGCACATAGAGTCAAATCCATTCTTGCCAACATGCGTATCCCGTCCACTAGATCACGAGCTTGTTGACCATGCCGCGTGAAA
>PS0244_sulcis
TTCATATAGTTTACTGTATATCTACCCTACACATATACAGTACTAATCCAGCATAAACGTAATGTATGTACATTACATTTTATGATCTACTTCATGTGTACGTACATAATATTAATGTAACAAGGACATAGTATGTATATAGTACATTAAACGATTTTCCACATGCATATTAAGCACGTACATCAATATTAATGTAATAAGGACATAGTATGTATATTGTACATTAAACGATCTTCCTCATGCATATAAGCATGTATAATGTTTCTATCGGCAGTACATAGTACATTTTACTGCATATTCGTACATGGCACATAGAGTCAAATCCATTCTTGCCAACATGCGTATCCCGTCCACTAGATCACGAGCTTGTTGACCATGCCGCGTGAAA
>PS0245_sulcis
TTCATATAGTTTACTGTATATCTGCCCTACACATATGCAGTACTAATCCAGCATAAACGTAATGTATGTACATTACATTTTATGATCTACTTCATGTGCACGTACATAATATTAATGTAACAAGGACATAGTATGTATATAGTACATTAAACGATTTTCCGCATGCATATTAAGCACGTACATCAGTATTAATGTAATAAGGACATAATATGTATATTGTACATTAAACGATCTTCCTCATGCATATAAGCATGTATAATGCTTCTATTGGCAGTACATAGTACATTTTACTGCATATTCGTACATGGCACATAGAGTCAAATCCATTCTTGCCAACATGCGTATCCCGTCCACTAGATCACGAGCTTGTTGACCATGCCGCGTGAAA
>PS0341_iglesiente
TTCATATAGTTTACTGTATATCTACCCTACACATATGCAGTACTAATCCAGCATAAACGTAATGTATGTACATTACATTTTATGATCTACTTCATGTGTACGTACATAATATTAATGTAACAAGGACATAGTATGTATATAGTACATTAAACGATTTTCCACATGCATATTAAGCACGTACATCAATATTAATGTAATAAGGACATAGTATGTATATTGTACATTAAACGATCTTCCTCATGCATATAAGCATGTATAATATTTCTATCGGCAGTACATAGTACATTTTACTGCATATTCGTACATGGCACATAGGGTCAAATCCATTCTTGCCAACATGCGTATCCCGTCCACTAGATCACGAGCTTGTTGACCATGCCGCGTGAAA
>PS0342_iglesiente
TTCATATAGTTTACTGTATATCTACCCTACACATATGCAGTACTAATCCAGCATGAACGTAATGTATGTACATTACATTTTATGATCTACTTCATGTGTACGTACATAATATTAATGTAACAAGGACATAGTATGTATATAGTACATTAAACGATTTCCCACATGCATATTAAGCACGTACATCAGTATTAATGTAATAAGGACATAGTATGTATATTGTACATTAAACGATCTTCCTCATGCATATAAGCATGTATAATGTTCCTACCGGCAGTACATAGTACATTTTACTGCATATTCGTACATAGCACATAAAGTCAAATCCATTCTTGCCAACATGCGTATCCCGTCCACTAGATCACGAGCTTGTCGACCATGCCGCGTGAAA
>PS0343_iglesiente
TTCATATAGTTTACTGTATATCTACCCTACACATATGCAGTACTAATCCAGCATGAACGTAATGTATGTACATTACATTTTATGATCTACTTCATGTGTACGTACATAATATTAATGTAACAAGGACATAGTATGTATATAGTACATTAAACGATTTCCCACATGCATATTAAGCACGTACATCAGTATTAATGTAATAAGGACATAGTATGTATATTGTACATTAAACGATCTTCCTCATGCATATAAGCATGTATAATGTTCCTACCGGCAGTACATAGTACATTTCACTGCATATTCGTACATAGCACATAAAGTCAAATCCATTCTTGTCAACATGCGTATCCCGTCCACTAGATCACGAGCTTGTCGACCATGCCGCGTGAAA
>PS0344_iglesiente
TTCATATAGTTTACTGTATATCTACCCTACACATATGCAGTACTAATCCAGCATAAACGTAATGTATGTACATTACATTTTATGATCTACTTCATGTGTACGTACATAATATTAATGTAATAAGGACATAGTATGTATATAGTACATTAAACGATTTTCCGCATGCATATTAAGCACGTACATCAGTATTAATGTAATAAGGACATAGTATGTATATCGTACATTAAACGATCTTCCTCATGCATATAAGCATGTACAATGCCTCCATCGGCAGTACATAGTACATTTTACTGCATATTCGTACATGGCACATAGAGTCAAATCCATTCTTGTCAACATGCGTATCCCGTCCACTAGATCACGAGCTTGTTGACCATGCCGCGTGAAA
>PS0345_iglesiente
TTCATATAGTTTACTGTATATCTACCCTACACATATGCAGTACTAATCCAGCATGAACGTAATGTATGTACATTACATTTTATGATCTACTTCATGTGTACGTACATAATATTAATGTAACAAGGACATAGTATGTATATAGTACATTAAACGATTTCCCACATGCATATTAAGCACGTACATCAGTATTAATGTAATAAGGACATAGTATGTATATTGTACATTAAACGATCTTCCTCATGCATATAAGCATGTATAATGTTCCTACCGGCAGTACATAGTACATTTTACTGCATATTCGTACATAGCACATAAAGTCAAATCCATTCTTGCCAACATGCGTATCCCGTCCACTAGATCACGAGCTTGTCGACCATGCCGCGTGAAA
>PS0441_sulcis
TTCATATAGTTTACTGTATATCTACCCTACACATATGCAGTACTAATCCAGCATAAACGTAATGTATGTACATTACATTTTATGATCTACTTCATGTGCACGTACATAGTATTAATGTAACAAGGACATAGTATGTATATAGTACATTAAACGATTTTCCACATGCATATTAAGCACGTACATCAGTATTAATGTAATAAGGACATAGTATGTATATTGTACATTAAACGATCTTCCCCATGCATATAAGCATGTACAATGCTCCTATCGGCAGTACATAGTACATTTTACTGCATACTCGTACATGGCACATGGAGTCAAATCCATTCTCGCCAACATGCGTATCCCGTCCACTAGATCACGAGCTTGTTGACCATGCCGCGTGAAA
>PS0442_sulcis
TTCATATAGTTTACTGTATATCTACCCTACACATATGCAGTACTAATCCAGCATAAACGTAATGTATGTACATTACATTTTATGATCTACTTCATGTGTACGTACATAATATTAATGTAACAAGGACATAGTATGTATATAGTACATTAAACGATTTTCCACATGCATATTAAGCACGTACATCAGTATTAATGTAATAAGGACATAGTATGTATATTGTACATTAAACGATCTTCCTCATGCATATAAGCATGTATAATATTTCTATCGGCAGTACATAGTACATTTTACTGCATATTCGTACATGGCACATAGAGTCAAATCCATTCTTGCCAACATGCGTATCCCGTCCACTAGATCACGAGCTTGTTGACCATGCCGCGTGAAA
>PS0443_sulcis
TTCATATAGTTTACTGTATATCTACCCTACACATATGCAGTACTAATCCAGCATAAACGTAATGTATGTACATTACATTTTATGATCTACTTCATGTGCACGTACATAATATTAATGTAATAAGGACATAGTATGTATATAGTACATTAAACGATTTTCCGCATGCATATTAAGCACGTACATCAGTATTAATGTAATAAGGACATAGTATGTATATTGTACATTAAACGATCTTCCTCATGCATATAAGCATGTACAATGCCTCCATCGGCAGTACATAGTACATTTTACTGCATATTCGTACATGGCACATAGAGTCAAATCCATTCTTGTCAACATGCGTATCCCGCCCACTAGATCACGAGCTTGTTGACCATGCCGCGTGAAA
>PS0444_sulcis
TTCATATAGTTTACTGTATATCTACCCTACACATATACAGTACTAATCCAGCATAAACGTAATGTATGTACATTACATTTTATGATCTACTTCATGTGTACGTACATAATATTAATGTAACAAGGACATAGTATGTATATAGTACATTAAACGATTTTCCACATGCATATTAAGCACGTACATCAATATTAATGTAATAAGGACATAGTATGTATATTGTACATTAAACGATCTTCCTCATGCATATAAGCATGTATAATGTCTCTATCGGCAGTACATAGTACATTTTACTGCATATTCGTACATGGCACATAGAGTCAAATCCATTCTTGCCAACATGCGTATCCCGTCCACTAGATCACGAGCTTGTTGACCATGCCGCGTGAAA
>PS0445_sulcis
TTCATATAGTTTACTGTATATCTACCCTACACATATGCAGTACTAATCCAGCATAAACGTAATGTATGTACATTACATTTTATGATCTACTTCATGTGTACGTACATAATATTAATGTAACAAGGACATAGTATGTATATAGTACATTAAACGATTTTCCACATGCATATTAAGCACGTACATCAGTATTAATGTAATAAGGACATAGTATGTATATTGTACATTAAACGATCTTCCCCATGCATATAAGCATGTATAATATTTCTATCGGCAGTACATAGTACATTTTACTGCATATTCGTACATGGCACATAGGGTCAAATCCATTCTTGCCAACATGCGTATCCCGTCCACTAGATCACGAGCTTGTTGACCATGCCGCGTGAAA
>PS0541_iglesiente
TTCATATAGTTTACTGTATATCTACCCTACACATATGCAGTACTAATCCAGCATAAACGTAATGTATGTACATTACATTTTATGATCTACTTCATGTGCACGTACATAATATTAATGTAATAAGGACATAGTATGTATATAGTACATTAAACGATTTTCCGCATGCATATTAAGCACGTACATCAGTATTAATGTAATAAGGACATAGTATGTATATTGTACATTAAACGATCTTCCTCATGCATATAAGCATGTACAATGCCTCCATCGGCAGTACATAGTACATTTTACTGCATATTCGTACATGGCACATAGAGTCAAATCCATTCTTGTCAACATGCGTATCCCGCCCACTAGATCACGAGCTTGTTGACCATGCCGCGTGAAA
>PS0542_iglesiente
TTCATATAGTTTACTGTATATCTACCCTACACATATGCAGTACTAATCCAGCATAAACGTAATGTATGTACATTACATTTTATGATCTACTTCATGTGCACGTACATAATATTAATGTAATAAGGACATAGTATGTATATAGTACATTAAACGATTTTCCACATGCATATTAAGCACGTACATCAGTATTAATGTAATAAGGACATAGTATGTATATTGTACATTAAACGATCTTCCTCATGCATATAAGCATGTACAATGCCTCCATCGGCAGTACATAGTACATTTTACTGCATATTCGTACATGGCACATAGAGTCAAATCCATTCTTGTCAACATGCGTATCCCGTCCACTAGATCACGAGCTTGTTGACCATGCCGCGTGAAA
>PS0543_iglesiente
TTCATATAGTTTACTGTATATCTACCCTACACATATGCAGTACTAATCCAGCATAAACGTAATGTATGTACATTACATTTTATGATCTACTTCATGTGCACGTACATAATATTAATGTAATAAGGACATAGTATGTATATAGTACATTAAACGATTTTCCGCATGCATATTAAGCACGTACATCAGTATTAATGTAATAAGGACATAATATGTATATTGTACATTAAACGATCTTCCTCATGCATATAAGCATGTACAATGCCTCCATCGGCAGTACATAGTACATTTTACTGCATATTCGTACATGGCACATAGAGTCAAATCCATTCTTGTCAACATGCGTATCCCGCCCACTAGATCACGAGCTTGTTGACCATGCCGCGTGAAA
>PS0544_iglesiente
TTCATATAGTTTACTGTATATCTACCCTACACATATGCAGTACTAATCCAGCATGAACGTAATGTATGTACATTACATTTTATGATCTACTTCATGTGTACGTACATAATATTAATGTAACAAGGACATAGTATGTATATAGTACATTAAACGATTTCCCACATGCATATTAAGCACGTACATCAGTATTAATGTAATAAGGACATAGTATGTATATTGTACATTAAACGATCTTCCTCATGCATATAAGCATGTATAATGTTCCTACCGGCAGTACATAGTACATTTTACTGCATATTCGTACATAGCACATAAAGTCAAATCCATTCTCGCCAACATGCGTATCCCGTCCACTAGATCACGAGCTTGTCGACCATGCCGCGTGAAA
>PS0545_iglesiente
TTCATATAGTTTACTGTATATCTACCCTACACATATGCAGTACTAATCCAGCATAAACGTAATGTATGTACATTACATTTTATGATCTACTTCATGTGCACGTACATAATATTAATGTAACAAGGACATAGTATGTATATAGTACATTAAACGATTTTCCACATGCATATTAAGCACGTACATCAGTATTAATGTAATAAGGACATAGTATGTATATCGTACATTAAACGATCTTCCCCATGCATATAAGCATGTATAATGCCTCCATTAGCAGTACATAGCACATTTTACTGCATATTCGTACATGGCACATAGAGTCAAATCCGTTCTTGCCAACATGCGTATCCCGTCCACTAGATCACGAGCTTGTTGACCATGCCGCGTGAAA
>PS0841_ogliastra
TTCATATAGTTTACTGTATATCTACCCTACACATATGCAGTACTAATCCAGCATGAACGTAATGTATGTACATTACATTTTATGATCTACTTCATGTGTACGTACATAATATTAATGTAACAAGGACATAGTATGTATATAGTACATTAAACGATTTCCCACATGCATATTAAGCACGTACATCAGTATTAATGTAATAAGGACATAGTATGTATATTGTACATTAAACGATCTTCCTCATGCATATAAGCATGTACAATGTTCCTACCGGCAGTACATAGTACATTTTACTGCATATTCGTACATAGCACATAAAGTCAAATCCATTCTTGCCAACATGCGTATCCCGTCCACTAGATCACGAGCTTGTCGACCATGCCGCGTGAAA
>PS0843_ogliastra
TTCATATAGTTTACTGTATATCTACCCTACACATATGCAGTACTAATCCAGCATAAACGTAATGTATGTACATTACATTTTATGATCTACTTCATGTGCACGTACATAATATTAATGTAATGAGGACATAGTATGTATATAGTACATTAAACGATTTTCCGCATGCATATTAAGCACGTACATCAGTATTAATGTAATAAGGACATAGTATGTATATTGTACATTAAACGATCTTCCTCATGCATATAAGCATGTACAATGCCTCCATCGGCAGTACATAGTACATTTTACTGCATATTCGTACATGGCACATAGAGTCAAATCCATTCTTGTCAACATGCGTATCCCGTCCACTAGATCACGAGCTTGTTGACCATGCCGCGTGAAA
>PS0844_ogliastra
TTCATATAGTTTACTGTATATCTACCCTACACATATGCAGTACTAATCCAGCATAAACGTAATGTATGTACATTACATTTTATGATCTACTTCATGTGTACGTACATAATATTAATGTAACAAGGACATAGTATGTATATAGTACATTAAACGATTTTCCACATGCATATTAAGCACGTACATCAATATTAATGTAATGAAGACATAATATGTATATTGTACATTAAACGATCTTCCCCATGCATATAGGCATGTATAATGTTTCTATCGGCAGTACATAGTACATTTTACTGCATATTCGTACATGGCACATAGAGTCAAATCCATTCTTGCCAACATGCGTATCCCGTCCACTAGATCACGAGCTTGTTGACCATGCCGCGTGAAA
>PS0845_ogliastra
TTCATATAGTTTACTGTATATCTACCCTACACATATGCAGTACTAATCCAGCATGAACGTAATGTATGTACATTACATTTTATGATCTACTTCATGTGTACGTACATAATATTAATGTAACAAGGACATAGTATGTATATAGTACATTAAACGATTTCCCACATGCATATTAAGCACGTACATCAGTATTAATGTAATAAGGACATAGTATGTATATTGTACATTAAACGATCTTCCTCATGCATATAAGCATGTATAATGTTCCTACCGGCAGTACATAGTACATTTTACTGCATATTCGTACATAGCACATAAAGTCAAATCCATTCTCGCCAACATGCGTATCCCGTCCACTAGATCACGAGCTTGTCGACCATGCCGCGTGAAA
>PS1041_sulcis
TTCATATAGTTTACTGTATATCTACCCTACACATATGCAGTACTAATCCAGCATAAACGTAATGTATGTACATTACATTTTATGATCTACTTCATGTGTACGTACATAATATTAATGTAACAAGGACATAGTATGTATATAGTACATTAAACGATTTTCCACATGCATATTAAGCACGTACATCAGTATTAATGTAATAAGGACATAGTATGTATATCGTACATTAAACGATCTTCCTCATGCATATAAGCATGTATAATATTTCTATCGGCAGTACATAGTACATTTTACTGCATATTCGTACATGGCACATAGAGTCAAATCCATTCTTGCCAACATGCGTATCCCGTCCACTAGATCACGAGCTTGTTGACCATGCCGCGTGAAA
>PS1042_sulcis
TTCATATAGTTTACTGTATATCTACCCTACACATATGCAGTACTAATCCAGCATAAACGTAATGTATGTACATTACATTTTATGATCTACTTCATGTGTATGTACATAATATTAATGTAACAAGGACATAGTATGTATATAGTACATTAAACGATTTTCCACATGCATATTAAGCGCGTACATCAGTATTAATGTAATAAGGACATAATATGTATATTGTACATTAAACGATCTTCCTCATGCATATAAGCATGTATAATGTTTCTATCGGCAGTACATAGTACATTTTACTGCATACTCGTACATAGCACATAGAGTCAAATCCATTCTTGCCAACATGCGTATCCCGTCCACTAGATCACGAGCTTGTTGACCATGCCGCGTGAAA
>PS1043_sulcis
TTCATATAGTTTACTGTATATCTACCCTACACATATGCAGTACTAATCCAGCATAAACGTAATGTATGTACATTACATTTTATGATCTACTTCATGTGCACGTACATAATATTAATGTAATAAAGACATAGTATGTATATAGTACATTAAACGATTTTCCACATGCATATTAAGCACGTACATCAATATTAATGTAATAAGGACATAGTATGTATATTGTACATTAAACGATCTTCCCCATGCATATAAGCATGTACAATGCCTCCATCGGCAGTACATAGTACATTTTATTGCATATTCGTACATGGCACATAGAGTCAAATCCATTCTTGTCAACATGCGTATCCCGTCCACTAGATCACGAGCTTGTTGACCATGCCGCGTGAAA
>PS1044_sulcis
TTCATATAGTTTACTGTATATCTACCCTACACATATGCAGTACTAATCCAGCATAAACGTAATGTATGTACATTACATTTTATGATCTACTTCATGTGCACGTACATAGTATTAATGTAACAAGGACATAGTATGTATATAGTACATTAAACGATTTTCCACATGCATATTAAGCACGTACATCAGTATTAATGTAATAAGGACATAGTATGTATATTGTACATTAAACGATCTTCCCCATGCATATAAGCATGTACAATGCTCCTATCGGCAGTACATAGTACATTTTACTGCATACTCGTACATGGCACATGGAGTCAAATCCATTCTCGCCAACATGCGTATCCCGTCCACTAGATCACGAGCTTGTTGACCATGCCGCGTGAAA
>PS1045_sulcis
TTCATATAGTTTACTGTATATCTACCCTACACATATGCAGTACTAATCCAGCATAAACGTAATGTATGTACATTACATTTTATGATCTACTTCATGTGCACGTACATAATATTAATGTAATAAGGACATAGTATGTATATAGTACATTAAACGATTTTCCGCATGCATATTAAGCACGTACATTAGTATTAATGTAATAAGGACATAGTATGTATATTGTACATTAAACGATCTTCCTCATGCATATAAGCATGTACAATGCCTCCATCGGCAGTACATAGTACATTTTACTGCATATTCGTACATGGCACATAGAGTCAAATCCATTCTTGTCAACATGCGTATCCCGTCCACTAGATCACGAGCTTGTTGACCATGCCGCGTGAAA
>PS10601_sulcis
TTCATATAGTTTACTGTATATCTACCCTACACATATGCAGTACTAATCCAGCATAAACGTAATGTATGTACATTACATTTTATGATCTACTTCATGTGTACGTACATAATATTAATGTAACAAGGACATAGTATGTATATAGTACATTAAACGATTTTCCACATGCATATTAGGCACGTACATCAGTATTAATGTAATAAGGACATAGTATGTATATTGTACATTAAACGATCTTCCTCATGCATATAAGCATGTATAATATTTCTATCGGCAGTACATAGTACATTTTACTGCATATTCGTACATGGCACATAGGGTCAAATCCATTCTTGCCAACATGCGTATCCCGTCCACTAGATCACGAGCTTGTTGACCATGCCGCGTGAAA
>PS10602_sulcis
TTCATATAGTTTACTGTATATCTACCCTACACATATGCAGTACTAATCCAGCATAAACGTAATGTATGTACATTACATTTTATGATCTACTTCATGTGCACGTACATAGTATTAATGTAACAAGGACATAGTATGTATATAGTACATTAAACGATTTTCCACATGCATATTAAGCACGTACATCAGTATTAATGTAATAAGGACATAGTATGTATATTGTACATTAAACGATCTTCCCCATGCATATAAGCATGTACAATGCTCCTATCGGCAGTACATAGTACATTTTACTGCATACTCGTACATGGCACATGGAGTCAAATCCATTCTCGCCAACATGCGTATCCCGTCCACTAGATCACGAGCTTGTTGACCATGCCGCGTGAAA
>PS10603_sulcis
TTCATATAGTTTACTGTATATCTACCCTACACATATGCAGTACTAATCCAGCATAAACGTAATGTATGTACATTACATTTTATGATCTACTTCATGTGCACGTACATAGTATTAATGTAACAAGGACATAGTATGTATATAGTACATTAAACGATTTTCCACATGCATATTAAGCACGTACATCAGTATTAATGTAATAAGGACATAGTATGTATATTGTACATTAAACGATCTTCCTCATGCATATAAGCATGTACAATGCTCCTATCGGCAGTACATAGTACATTTTACTGCATATTCGTACATGGCACATGGAGTCAAATCCATTCTCGCCAACATGCGTATCCCGTCCACTAGATCACGAGCTTGTTGACCATGCCGCGTGAAA
>PS10604_sulcis
TTCATATAGTTTACTGTATATCTACCCTACACATATGCAGTACTAATCCAGCATAAACGTAATGTATGTACATTACATTTTATGATCTACTTCATGTGCACGTACATAATATTAATGTAACAAGGACATAGTATGTATATAGTACATTAAACGATTTTCCACATGCATATTAAGCACGTACATCAGTATTAATGTAATAAGGACATAATATGTATATTGTACATTAAACGATCTTCCCCATGCATATAAGCATGTACAATGCTTCTATTGGCAGTACATAGTACATTTTACTGCATATTCGTACATGGCACATAGAGTCAAATCCATTCTTGCCAACATGCGTATCCCGTCCACTAGATCACGAGCTTGTTGACCATGCCGCGTGAAA
>PS10605_sulcis
TTCATATAGTTTACTGTATATCTACCCTACACATATGCAGTACTAATCCAGCATAAACGTAATGTATGTACATTACATTTTATGATCTACTTCATGTGCACGTACATAATATTAATGTAATAAAGACATAGTATGTATATAGTACATTAAACGATTTTCCACATGCATATTAAGCACGTACATCAATATTAATGTAATAAGGACATAGTATGTATATTGTACATTAAACGATCTTCCCCATGCATATAAGCATGTACAATGCCTCCATCGGCAGTACATAGTACATTTTATTGCATATTCGTACATGGCACATAGAGTCAAATCCATTCTTGTCAACATGCGTATCCCGTCCACTAGATCACGAGCTTGTTGACCATGCCGCGTGAAA
>PS10701_sulcis
TTCATATAGTTTACTGTATATCTACCCTACACATATGCAGTACTAATCCAGCATAAACGTAATGTATGTACATTACATTTTATGATCTACTTCATGTGTACGTACATAATATTAATGTAACAAGGACATAGTATGTATATAGTACATTAAACGATTTTCCACATGCATATTAAGCACGTACATCAGTATTAATGTAATAAGGACATAGTATGTATATTGTACATTAAACGATCTTCCTCATGCATATAAGCATGTATAATATTTCTATCGGCAGTACATAGTACATTTTACTGCATATTCGTACATGGCACATAGGGTCAAATCCATTCTTGCCAACATGCGTATCCCGTCCACTAGATCACGAGCTTGTCGACCATGCCGCGTGAAA
>PS10702_sulcis
TTCATATAGTTTACTGTATATCTACCCTACACATATGCAGTACTAATCCAGCATAAACGTAATGTATGTACATTACATTTTATGATCTACTTCATGTGTACGTACATAATATTAATGTAACAAGGACATAGTATGTATATAGTACATTAAACGATTTTCCACATGCATATTAAGCACGTACATCAGTATTAATGTAATAAGGACATAACATGTATATTGTACATTAAACGATCTTCCTCATGCATATAAGCATGTATAACGCTTCTATCGGCAGTACATAGTACATTCTACTGCATATTCGTACATGGCACATAGAGTCAAATCCATTCTTGTCAACATGCGTATCCCGTCCACTAGATCACGAGCTTGTTGACCATGCCGCGTGAAA
>PS10703_sulcis
TTCATATAGTTTACTGTATATCTACCCTACACATATGCAGTACTAATCCAGCATAAACGTAATGTATGTACATTACATTTTATGATCTACTTCATGTGTACGTACATAATATTAATGTAACAAGGACATAGTATGTATATAGTACATTAAACGATTTTCCACATGCATATTAAGCACGTACATCAGTATTAATGTAATAAGGACATAGTATGTATATTGTACATTAAACGATCTTCCTCATGCATATAAGCATGTATAATATTTCTATCGGCAGTACATAGTACATTTTACTGCATATTCGTACATGGCACATAGGGTCAAATCCATTCTTGCCAACATGCGTATCCCGTCCACTAGATCACGAGCTTGTTGACCATGCCGCGTGAAA
>PS10704_sulcis
TTCATATAGTTTACTGTATATCTACCCTACACATATGCAGTACTAATCCAGCATAAACGTAATGTATGTACATTACATTTTATGATCTACTTCATGTGCACGTACATAATATTAATGTAATAAGGACATAGTATGTATATAGTACATTAAACGATTTTCCGCATGCATATTAAGCACGTACATCAGTATTAATGTAATAGGGACATAGTATGTATATTGTACATTAAACGATCTTCCTCATGCATATAAGCATGTACAATGCCTCCATCGGCAGTACATAGTACATTTTACTGCATATTCGTACATGGCACATAGAGTCAAATCCATTCTTGTCAACATGCGTATCCCGTCCACTAGATCACGAGCTTGTTGACCATGCCGCGTGAAA
>PS10705_sulcis
TTCATATAGTTTACTGTATATCTACCCTACACATATGCAGTACTAATCCAGCATAAACGTAATGTATGTACATTACATTTTATGATCTACTTCATGTGTACGTACATAATATTAATGTAACAAGGACATAATATGTATATAGTACATTAAACGATTTTCCACATGCATATTAAGCACGTACATCAGTATTAATGTAATAAGGACATAATATGTATATTGTACATTAAACGATCTTCCTCATGCATATAAGCATGTATAATGCTTCTATCAGCAGTACATAGTACATTTTACTGCATATTCGTACATAGCACATAGAGTCAAATCCATTCTTGTCAACATGCGTATCCCGTCCACTAGATCACGAGCTTGTTGACCATGCCGCGTGAAA
>PS10801_sulcis
TTCATATAGTTTACTGTATATCTACCCTACACATATGCAGTACTAATCCAGCATAAACGTAATGTATGTACATTACATTTTATGATCTACTTCATGTGCACGTACATAATATTAATGTAATAAGGACATAGTATGTATATAGTACATTAAACGATTTTCCGCATGCATATTAAGCACGTACATCAGTATTAATGTAATAAGGACATAGTATGTATATTGTACATTAAACGATCTTCCTCATGCATATAAGCATGTACAATGCCTCCATCGGCAGTACATAGTACATTTTACTGCATATTCGTACATGGCACATAGAGTCAAATCCATTCTTGTCAACATGCGTATCCCGTCCACTAGATCACGAGCTTGTTGACCATGCCGCGTGAAA
>PS10802_sulcis
TTCATATAGTTTACTGTATATCTACCCTACACATATGCAGTACTAATCCAGCATAAACGTAATGTATGTACATTACATTTTATGATCTACTTCATGTGTACGTACATAATATTAATGTAACAAGGACATAGTATGTATATAGTACATTAAACGATTTTCCACATGCATATTAAGCACGTACATCAGTATTAATGTAATAAGGACATAGTATGTATATTGTACATTAAACGATCTTCCTCATGCATATAAGCATGTATAATATTTCTATCGGCAGTACATAGTACATTTTACTGCATATTCGTACATGGCACATAGGGTCAAATCCATTCTTGCCAACATGCGTATCCCGTCCACTAGATCACGAGCTTGTTGACCATGCCGCGTGAAA
>PS10803_sulcis
TTCATATAGTTTACTGTATATCTACCCTACACATATGCAGTACTAATCCAGCATAAACGTAATGTATGTACATTACATTTTATGATCTACTTCATGTGCACGTACATAGTATTAATGTAACAAGGACATAGTATGTATATAGTACATTAAACGATTTTCCACATGCATATTAAGCACGTACATCAGTATTAATGTAATAAGGACATAGTATGTATATTGTACATTAAACGATCTTCCTCATGCATATAAGCATGTACAATGCTCCTATCGGCAGTACATAGTACATTTTACTGCATACTCGTACATGGCACATGGAGTCAAATCCATTCTCGCCAACATGCGTATCCCGTCCACTAGATCACGAGCTTGTTGACCATGCCGCGTGAAA
>PS10804_sulcis
TTCATATAGTTTACTGTATATCTACCCTACACATATGCAGTACTAATCCAGCATAAACGTAATGTATGTACATTACATTTTATGATCTACTTCATGTGTACGTACATAATATTAATGTAACAAGGACATAGTATGTATATAGTACATTAAACGATTTTCCACATGCATATTAAGCACGTACATCAGTATTAATGTAATAAGGACATAGTATGTATATTGTACATTAAACGATCCTCCCCATGCATATAAGCATGTATAATATTTCTATCGACAGTACATAGTACATTTTACTGCATATTCGTACATGGCACATAGGGTCAAATCCATTCTTGCCAACATGCGTATCCCGTCCACTAGATCACGAGCTTGTTGACCATGCCGCGTGAAA
>PS10805_sulcis
TTCATATAGTTTACTGTATATCTACCCTACACATATGCAGTACTAATCCAGCATAAACGTAATGTATGTACATTACATTTTATGATCTACTTCATGTGCACGTACATAGTATTAATGTAACAAGGACATAGTATGTATATAGTACATTAAACGATTTTCCACATGCATATTAAGCACGTACATCAGTATTAATGTAATAAGGACATAGTATGTATATTGTACATTAAACGATCTTCCTCATGCATATAAGCATGTACAATGCTCCTATCGGCAGTACATAGTACATTTTACTGCATACTCGTACATGGCACATGGAGTCAAATCCATTCCCGTCAACATGCGTATCCCGTCCACTAGATCACGAGCTTGTTGACCATGCCGCGTGAAA
>PS10901_ogliastra
TTCATATAGTTTACTGTATATCTACCCTACACATATGCAGTACTAATCCAGCATAAACGTAATGTATGTACATTACATTTTATGATCTACTTCATGTGCACGTACATAATATTAATGTAACAAGGACATAGTATGTATATAGTACATTAAACGATTTTCCACATGCATATTAAGCACGTACATCAGTATTAATGTAATAAGGACATAGTATGTATATCGTACATTAAACGATCTTCCTCATGCATATAAGCATGTATAATGTCTCCATTGGCAGTACATAGTACATTTTACTGCATATTCGTACATGGCACATAGAGTCAAATCCATTCTTGCCAACATGCGTATCCCGTCCACTAGATCACGAGCTTGTTGACCATGCCGCGTGAAA
>PS10902_ogliastra
TTCATATAGTTTACTGTATATCTACCCTACACATATGCAGTACTAATCCAGCATAAACGTAATGTATGTACATTACATTTTATGATCTACTTCATGTGCACGTACATAATATTAATGTAACAAGGACATAGTATGTATATAGTACATTAAACGATTTTCCGCATGCATATTAAGCACGTACATCAGTATTAATGTAATAAGGACATAGTATGTATATTGTACATTAAACGATCTTCCTCATGCATATAAGCATGTACAATGTTTCTATCGGTAGTACATAGTACATTTTACTGCATATTCGTACATGGCACATGAAGTCAAATCCATTCTCGCCAACATGCGTATCCCGTCCACTAGATCACGAGCTTGTTGACCATGCCGCGTGAAA
>PS10903_ogliastra
TTCATATAGTTTACTGTATATCTACCCTACACATATGCAGTACTAATCCAGCATAAACGTAATGTATGTACATTACATTTTATGATCTACTTCATGTGCACGTACATAATATTAATGTAACAAGGACATAGTATGTATATAGTACATTAAACGATTTTCCACATGCATATTAAGCACGTACATCAGTATTAATGTAATAAGGACATAATATGTATATTGTACATTAAACGATCTTCCTCATGCATATAAGCATGTATAATGTCTCTATTGGCAGTACATAGTACATTTTACTGCATATTCGTACATGGCACATAGAGTCAAATCCATTCTTGCCAACATGCGTATCCCGTCCACTAGATCACGAGCTTGTTGACCATGCCGCGTGAAA
>PS10904_ogliastra
TTCATATAGTTTACTGTATATCTACCCTACACATATGCAGTACTAATCCAGCATAAACGTAATGTATGTACATTACATTTTATGATCTACTTCATGTGTACGTACATAATATTAATGTAACAAGGACATAGTATGTATATAGTACATTAAACGATTTTCCACATGCATATTAAGCACGTACATCAGTATTAATGTAATAAGGACATAGTATGTATATTGTACATTAAACGATCTTCCTCATGCATATAAGCATGTATAATATTTCTATCGACAGTACATAGTACATTTTACTGCATATTCGTACATGGCACATAGGGTCAAATCCATTCTTGCCAACATGCGTATCCCGTCCACTAGATCACGAGCTTGTTGACCATGCCGCGTGAAA
>PS10905_ogliastra
TTCATATAGTTTACTGTATATCTACCCTACACATATGCAGTACTAATCCAGCATAAACGTAATGTATGTACATTACATTTTATGATCTACTTCATGTGCACGTACATAACATTAATGTAACAAGGACATAGTATGTATATAGTACATTAAACGATTTTCCACATGCATATTAAGCACGTACATCAGTATTAATGTAATAAGGACATAATATGTATATCGTACATTAAACGATCTCCCTCATGCATATAAGCATGTATAATGCCTCTATTGGCAGTACATAGTACATTTTACTGCATATTCGTACATGGCACATAGAGTCAAATCCATTCTTGCCAACATGCGTATCCCGTCCACTAGATCACGAGCTTGTTGACCATGCCGCGTGAAA
>PS10906_ogliastra
TTCATATAGTTTACTGTATATCTACCCTACACATATGCAGTACTAATCCAGCATAAACGTAATGTATGTACATTACATTTTATGATCTACTTCATGTGTACGTACATAATATTAATGTAACAAGGACATAGTATGTATATAGTACATTAAACGATTTTCCACATGCATATTAAGCACGTACATCAGTATTAATGTAATAAGGACATAGTATGTATATTGTACATTAAACGATCTTCCTCATGCATATAAGCATGTATAATATTTCTATCGACAGTACATAGTACATTTTACTGCATATTCGTACATGGCACATAGGGTCAAATCCATTCTTGCCAACATGCGTATCCCGTCCACTAGATCACGAGCTTGTTGACCATGCCGCGTGAAA
>PS10907_ogliastra
TTCATATAGTTTACTGTATATCTACCCTACACATATGCAGTACTAATCCAGCATAAACGTAATGTATGTACATTACATTTTATGATCTACTTCATGTGTACGTACATAATATTAATGTAACAAGGACATAGTATGTATATAGTACATTAAACGATTTTCCACATGCATATTAAGCACGTACATTAGTATTAATGTAATAGGGACATAACATGTATATTGTACATTAAACGATCTTCCTCATGCATATAAGCATGTATAACGCTTCTATCGGCAGTACATAGTACATTCTACTGCATATTCGTACATGGCACATAGAGTCAAATCCATTCTTGTCAACATGCGTATCCCGTCCACTAGATCACGAGCTTGTTGACCATGCCGCGTGAAA
>PS10908_ogliastra
TTCATATAGTTTACTGTATATCTACCCTACACATATGCAGTACTAATCCAGCATAAACGTAATGTATGTACATTACATTTTATGATCTACTTCATGTGCACGTACATAATATTAATGTAACAAGGACATAGTATGTATATAGTACATTAAACGATTTTCCACATGCATATTAAGCACGTACATCAGTATTAATGTAATAAGGACATAATATGTATATTGTACATTAAACGATCTTCCTCATGCATATAAGCATGTATAATGTCTCTATTGGCAGTACATAGTACATTTTACTGCATATTCGTACATGGCACATAGAGTCAAATCCATTCTTGCCAACATGCGTATCCCGTCCACTAGATCACGAGCTTGTTGACCATGCCGCGTGAAA
>PS10909_ogliastra
TCCATATAGTTTACTGTATATCTACCCTACACATATGCAGTACTAATCCAGCATAAACGTAATGTATGTACATTACATTTTATGATCTACTTCATGTGCACGTACATAGTATTAATGTAACAAGGACATAGTATGTATATAGTACATTAAACGATTTTCCACATGCATATTAAGCACGTACATCAGTATTAATGTAATAAGGACATAGTATGTATATTGTACATTAAACGATCTTCCTCATGCATATAAGCATGTACAATGCTCCTATCGGCAGTACATAGTACATTTTACTGCATACTCGTACATGGCACATGGAGTCAAATCCATTCTCGCCAACATGCGTATCCCGTCCACTAGATCACGAGCTTGTTGACCATGCCGCGTGAAA
>PS10910_ogliastra
TTCATATAGTTTACTGTATATCTACCCTACACATATACAGTACTAATCCAGCATAAACGTAATGTATGTACATTACATTTTATGATCTACTTCATGTGTACGTACATAATATTAATGTAACAAGGACATAGTATGTATATAGTACATTAAACGATTTTCCACATGCATATTAAGCACGTACATCAATATTAATGTAATAAGGACATAGTATGTATATCGTACATTAAACGATCTTCCTCATGCATATAAGCATGTATAATGCTTCTATCGGCAGTACATAGTACATTTTACTGCATATTCGTACATGGCACATAGAGTCAAATCCATTCTTGCCAACATGCGTATCCCGTCCACTAGATCACGAGCTTGTTGACCATGCCGCGTGAAA
>PS11001_ogliastra
TTCATATAGTTTACTGTATATCTACCCTACACATATGCAGTACTAATCCAGCATAAACGTAATGTATGTACATTACATTTTATGATCTACTTCATGTGCACGTACATAATATTAATGTAATGAGGACATAGTATGTATATAGTACATTAAACGATTTTCCGCATGCATATTAAGCACGTACATCAGTATTAATGTAATAAGGACATAGTATGTATATTGTACATTAAACGATCTTCCTCATGCATATAAGCATGTACAATGCCTCCATCGGCAGTACATAGTACATTTTACTGCATATTCGTACATGGCACATAGAGTCAAATCCATTCTTGTCAACATGCGTATCCCGTCCACTAGATCACGAGCTTGTTGACCATGCCGCGTGAAA
>PS11002_ogliastra
TTCATATAGTTTACTGTATATCTACCCTACACATATGCAGTACTAATCCAGCATAAACGTAATGTATGTACATTACATTTTATGATCTACTTCATGTGCACGTACATAATATTAATGTAACAAGGACATAGTATGTATATAGTACATTAAACGATTTTCCACATGCATATTAAGCACGTACATCAGTATTAATGTAACAAAGACATAGTATGTATATTGTACATTAAACGATCTTCCCCATGCATATAAGCATGTATAATACCTCTATTGGCAGTACATAGTACATTTTACTGCATATTCGTACATGGCACATAGAGTCAAATCCATTCTTGTCAACATGCGTATCCCGCCCACTAGATCACGAGCTTGTTGACCATGCCGCGTGAAA
>PS11004_ogliastra
TTCATATAGTTTACTGTATATCTACCCTACACATATGCAGTACTAATCCAGCATAAACGTAATGTATGTACATTACATTTTATGATCTACTTCATGTGCACGTACATAATATTAATGTAATAAAGACATAGTATGTATATAGTACATTAAACGATTTTCCGCATGCATATTAAGCACGTACATCAATATTAATGTAATAAGGACATAGTATGTATATCGTACATTAAACGATCTTCCTCATGCATATAAGCATGCACAATGCCTCCATCGGCAGTACATAGTACATTTTATTGCATATTCGTACATGGTACATAGAGTCAAATCCATTCTTGTCAACATGCGTATCCCGTCCACTAGATCACGAGCTTGTTGACCATGCCGCGTGAAA
>PS11005_ogliastra
TTCATATAGTTTACTGTATATCTACCCTACACATATGCAGTACTAATCCAGCATAAACGTAATGTATGTACATTACATTTTATGATCTACTTCATGTGCACGTACATAATATTAATGTAATAAGGACATAGTATGTATATAGTACATTAAACGATTTTCCGCATGCATATTAAGCACGTACATCAGTATTAATGTAATAAGGACATAATATGTATATTGTACATTAAACGATCTTCCTCATGCATATAAGCATGTACAATGCCTCCATCGGCAGTACATAGTACATTTTACTGCATATTCGTACATGGCACATAGAGTCAAATCCATTCTTGTCAACATGCGTATCCCGCCCACTAGATCACGAGCTTGTTGACCATGCCGCGTGAAA
>PS11101_ogliastra
TTCATATAGTTTACTGTATATCTACCCTACACATATGCAGTACTAATCCAGCATAAACGTAATGTATGTACATTACATTTTATGATCTACTTCATGTGCACGTACATAATATTAATGTAATAAAGACATAGTATGTATATAGTACATTAAACGATTTTCCGCATGCATATTAAGCACGTACATCAATATTAATGTAATAAGGACATAGTATGTATATTGTACATTAAACGATCTTCCTCATGCATATAAGCATGCACAATGCCTCCATCGGCAGTACATAGTACATTTTATTGCATATTCGTACATGGCACATAGAGTCAAATCCATTCTTGTCAACATGCGTATCCCGTCCACTAGATCACGAGCTTGTTGACCATGCCGCGTGAAA
>PS11102_ogliastra
TTCATATAGTTTACTGTATATCTACCCTACACATATGCAGTACTAATCCAGCATAAACGTAATGTATGTACATTACATTTTATGATCTACTTCATGTGCACGTACATAGTATTAATGTAACAAGGACATAGTATGTATATAGTACATTAAACGATTTTCCACATGCATATTAAGCACGTACATCAGTATTAATGTAATAAGGACATAGTATGTATATTGTACATTAAACGATCTTCCTCATGCATATAAGCATGTACAATGCTCCTATCGGCAGTACATAGTACATTTTACTGCATACTCGTACATGGCACATGGAGTCAAATCCATTCTCGCCAACATGCGTATCCCGTCCACTAGATCACGAGCTTGTTGACCATGCCGCGTGAAA
>PS11103_ogliastra
TTCATATAGTTTACTGTATATCTACCCTACACATATGCAGTACTAATCCAGCATAAACGTAATGTATGTACATTACATTTTATGATCTACTTCATGTGTACGTACATAATATTAATGTAACAAGGACATAGTATGTATATAGTACATTAAACGATTTTCCACATGCATATTAAGCACGTACATCAGTATTAATGTAATAGGGACATAACATGTATATTGTACATTAAACGATCTTCCTCATGCATATAAGCATGTATAACGCTTCTATCGGCAGTACATAGTACATTCTACTGCATATTCGTACATGGCACATAGAGTCAAATCCATTCTTGTCAACATGCGTATCCCGTCCACTAGATCACGAGCTTGTTGACCATGCCGCGTGAAA
>PS11104_ogliastra
TTCATATAGTTTACTGTATATCTACCCTACACATATGCAGTACTAATCCAGCATAAACGTAATGTATGTACATTACATTTTATGATCTACTTCATGTGCACGTACATAATATTAATGTAATAAAGACATAGTATGTATATAGTACATTAAACGATTTTCCGCATGCATATTAAGCACGTACATCAATATTAATGTAATAAGGACATAGTATGTATATTGTACATTAAACGATCTTCCTCATGCATATAAGCATGCACAATGCCTCCATCGGCAGTACATAGTACATTTTATTGCATATTCGTACATGGCACATAGAGTCAAATCCATTCTTGTCAACATGCGTATCCCGTCCACTAGATCACGAGCTTGTTGACCATGCCGCGTGAAA
>PS11105_ogliastra
TTCATATAGTTTACTGTATATCTACCCTACACATATGCAGTACTAATCCAGCATAAACGTAATGTATGTACATTACATTTTATGATCTACTTCATGTGCACGTACATAATATTAATGTAATAAGGACATAGTATGTATATAGTACATTAAACGATTTTCCGCATGCATATTAAGCACGTACATCAGTATTAATGTAATAAGGACATAGTATGTATATTGTACATTAAACGATCTTCCCCATGCATATAAGCATGTACAATGCCTCCATCGGCAGTACATAGTACATTTTACTGCATATTCGTACATGGCACATAGAGTCAAATCCATTCTTGTCAACATGCGTATCCCGCCCACTAGATCACGAGCTTGTTGACCATGCCGCGTGAAA
>EF617795_Middle_Europe
TTCATATAGTTTACTGTATATCTACCCTACACATATGCAGTACTAATCCAGCATAAACGTAATGTATGTACATTACATTTTATGATCTACTTCATGTGCACGTACATAATATTAATGTAACAAGGACATAGTATGTATATAGTACATTAAACGATTTTCCACATGCATATTAAGCACGTACATCAGTATTAATGTAATAAGGACATAGTATGTATATTGTACATTAAACGATCTTCCTCATGCATATAAGCATGTATAATGCCTCCATTGGCAGTACATAGTACATTTTACTGCATATTCGTACATGGCACATAGAGTCAAATCCATTCTTGTCAACATGCGTATCCCGTCCACTAGATCACGAGCTTGTTGACCATGCCGCGTGAAA
>EF617796_Middle_Europe
TTCATATAGTTTACTGTATATCTACCCTACACATATGCAGTACTAACCCAGCATAAACGTAATGTATGTACATTACATTTTATGATCTACTTCATGTGCACGTACATAATATTAATGTAACAAGGACATAGTATGTATATAGTACATTAAACGATTTTCCACATGCATATTAAGCACGTACATTAGTATTAATGTAATAAGGACATAATATGTATATTGTACATTAAACGATCTTCCTCATGCATATAAGCATGTATAATACCTCCATTAGCAGTACATAGTACATTTTACTGCATATTCGTACATGGCACATAGAGTCAAATCCATTCTTGCCAACATGCGTATCCCGTCCACTAGATCACGAGCTTGTTGACCATGCCGCGTGAAA
>EF617798_Middle_Europe
TTCATATAGTTTACTGTATATCTACCCTACACATATGCAGTACTAATCCAGCATAAACGTAATGTATGTACATTACATTTTATGATCTACTTCATGTGCACGTACATAATATTAATGTAACAAGGACATGGTATGTATATAGTACATTAAACGATTTTCCACATGCATATTAAGCACGTACATCAGTATTAATGTAATAAGGACATAGTATGTATATCGTACATTAAACGATCTTCCCCATGCATATAAGCATGTATAATGCTTCCATCAGCAGTACATAGTACATTTTACTGCATATTCGTACATGGTACATAGAGTCAAATCCATTCTTGTCAACATGCGTATCCCGTCCACTAGATCACGAGCTTGTTGACCATGCCGCGTGAAA
>EF618057_Middle_East
TTCATATAGTTTACTGTATATCTACCCTACACATATGCAGTACTAATCCAGCATAAACGTAATGTATGTACATTACATTTTATGATCTACTTCATGTGTACGTACATAATATTAATGTAACAGGGACATAATATGTATATAGTACATTAAACGATTTTCCACATGCATATTAAGTACGTACATCAGTATTAATGTAATAAGGACATAATATGTATATTGTACATTAAACGATCTTCCTCATGCATATAAGCATGTATAATGCTTCCATTGGCAGTACATAGTACATTTTACTGCATATTCGTACATGGCACATAGAGTCAAATCCATTCCTGCCAACATGCGTATCCCGTCCACTAGATCACGAGCTTGTTGACCATGCCGCGTGAAA
>EF617976_Middle_East
TTCATATAGTTTACTGTATATCTACCCTACACATATGCAGTACTAATCCAGCATAAACGTAATGTATGTACATTACATTTTATGATCTACTTCATGTGTACGTACATAATATTAATGTAACAAGGACATAGTATGTATATAGTACATTAAACGATTTTCCACATGCATATTAAGCACGTACATCAGTATTAATGTAATAAGGACATAGTATGTATATTGTACATTAAACGATCTTCCTCATGCATATAAGCATGTATAATGCTTCTATCGGCAGTACATAGTACATTCTACTGCATATTCGTACATGGCACATAGAGTCAAATCCATTCTTGCCAACATGCGTATCCCGTCCATTAGATCACGAGCTTGTCGACCATGCCGCGTGAAA
>EF618372_Mediterranean_Europe
TTCATATAGTTTACTGTATATCTACCCTACACATATGCAGTACTAATCCAGCATAAACGTAATGTATGTACATTACATTTTATGATCTACTTCATGTGCACGTACATAATATTAATGTAACAAGGACATAATATGTATATAGTACATTAAACGATTTTCCACATGCATATTAAGCACGTACATCAGTATTAATGTAATAAGGACATAGTATGTATATTGTACATTAAACGATCTTCCCCATGCATATAAGCATGTACAATACTTCTATCGGCAGTACATAGTACATTTTACTGCATATTCGTACATGGCACATGGAGTCAAATCCATTCTCGTCAACATGCGTATCCCGTCCACTAGATCACGAGCTTGTTGACCATGCCGCGTGAAA
>EF618373_Mediterranean_Europe
TTCATATAGTTTACTGTATATCTACCCTACACATATGCAGTACTAATCCAGCATAAACGTAATGTATGTACATTACATTTTATGATCTACTTCATGTGCACGTACATAATATTAATGTAACAAGGACATAGTATGTATATAGTACATTAAACGATTTTCCACATGCATATTAAGCACGTACATTAGTATTAATGTAATAAGGACATAATATGTATATTGTACATTAAACGATTTTCCCCATGCATATAAGCATGTATAATGCCTCTATTGGCAGTACATAGTACATTTTACTGCATATTCGTACATGGCACATAGAGTCAAATCCATTCTTGCCAACATGCGTATCCCGTCCACTAGATCACGAGCTTGTTGACCATGCCGCGTGAAA
>EF618399_Mediterranean_Europe
TTCATATAGTTTACTGTATATCTACCCTACACATATGCAGTACTAATCCAGCATAAACGTAATGTATGTACATTACATTTTATGATCTACTTCATGTGTACGTACATAATATTAATGTAACAAGGACATAGTATGTATATAGTACATTAAACGATTTTCCACATGCATATTAAGCACGTACATCAGTATTAATGTAATAAGGACATAGTATGTATACTGTACATTAAACGATCTTCCTCATGCATATAAGCATGTATAATATTTCTATTGGCAGTACATAGTACATTTTACTGCATGTTCGTACATGGCACATAGAGTCAAATCCATTCTTGCCAACATGCGTATCCCGTCCACTAGATCACGAGCTTGTTGACCATGCCGCGTGAAA
>EF618400_Mediterranean_Europe
TTCATATAGTTTACTGTATATCTACCCTACACATATGCAGTACTAATCCAGCATAAACGTAATGTATGAACATTACATTTTATGATCTACTTCATGTGTACGTACATAATATTAATGTAACAAGGACATAGTATGTATATAGTACATTAAACGATTTTCCACATGCATGTTAAGCACGTACATCAGTATTAATGTAATAAGGACATAGTATGTATATTGTACATTAAACGATCTTCCTCATGCATATAAGCATGTACAATGTTTCTATCGGCAGTACATAGTACATTTTACTGCATACTCGTACATGGCACATAGAGTCAAATCCATTCTTGCCAACATGCGTATCCCGTCCACTAGATCACGAGCTTGTTGACCATGCCGCGTGAAA
>EF618380_Mediterranean_Europe
TTCATATAGTTTACTGTATATCTACCCTACACATATGCAGTACTAATCCAGCATAAACGTAATGTATGTACATTACATTTTATGATCTACTTCATGTGCACGTACATAATATTAATGTAACAAGGACATAGTATGTATATAGTACATTAAATGATTTTCCACATGCATATTAAGCACGTACATCAGTATTAATGTAATAGGGACATAATATGTATATTGTACATTAAACGATCTTCCCCATGCATATAAGCATGTATAATGCCTCTATTGGCAGTACATAGTACATTTTACTGCATATTCGTACATGGCACATAGAGTCAAATCCATTCTTGCCAACATGCGTATCCCGTCCACTAGATCACGAGCTTGTTGACCATGCCGCGTGAAA
>EF989578_Middle_East_HGF
TTCATATAGTTTATTATATATCTACCCTACATATATGCCGTACCAGTCCAGCATAAACATGACGTATATATATTACATTTTATGATCTATTTCACGCATGTGTACATAGTATTAATGTAATAAGGACATGATATGTATATAGTACATTAAATGACTTCCCGCATGCATATTAAGTACGTACATCAATACTAATGTAGCAAGGACATAATATGTATATCGTACATTAAACGATCTCCCCCATGCATATAAGCATGTACAGTATTTCTATTGACAGTACATAGTACATTTTGCTGCATGTTCGTACATAGCACATGAAGTCAAATCCGTCCTCGTCAACATGCGTATCCCGTCCACTAGATCACGAGCTTGTCGACCATGCCGCGTGAAA
>EF989214_Middle_East_GHC
TTCATATAGTTTACTATATATCTACCCTACATATACGCAGTACTAATCCAACATAAACGTAATGTATGTACATTACATTTTATGGTCTACTTCACGTGTACGTACATAACATTAATGTAACAAAGACATAATATGTATATAGTACATTAAATGGTTTCCCACATGCATATTAAGCACGTACATCAGTATTAATGTAGTAAGGACATAATATGTATATTGTACATTAAACGATCTTCCCCATGCATATAAGCATGTACAATACCCCTATCGACAGTACATAGCACATTTTATTGTATATTCGTACATAGCGCATGAAGTCAAATCCGTCCTCGTCAACATGCATATCCCGTCCACTAGATCACGAGCTTGTTCACCATGCCGCGTGAAA
>EF989435_Middle_East_HGD
TTCATATAGTTTACTGTATATCTACCCTACACATATGCAGTACTAATCCAGCATAAACATAATGTATGTACATTACATTTTATGATCTACTTCACGTGTACGTACATAATATTAATGTAATGAGGACATAACATGTATATAGTACATTAAACGATTTTCCGCATGCATATTAAGCACGTACATCAGTATTAATGTAATAAAGACATAATATGTATATCGTACATTAAACGATCTTCCTCATGCATATAGGCATGTACAATACTTCTATTGGCAGTACATAGTACATTTTACTGCATACCCGTACATGGCACATAAAGTCAAATCCGTTCTTGTCAACATGCGTATCCCGTCCACTAGATCACGAGCTTGTCGACCATGCCGCGTGAAA
>EF989416_Middle_East
TTCATATAGTTTACTATATATCTACCCTACATATATGCAGTACTAATCCAACATAAACGTAATGTATGTACATTACATTTTATGGTCTACTTCACGTGTACGTACATAACATTAATGTAACAAAGACATAATATGTATATAGTACATTAAATGACTTTCCACATGCATATTAAGCACGTATATCAGTATTAATGTAATAAGGACATAGTATGTATATTGTACATTAAACGATCTTCCCCATGCATATAAGCATGTACAATACCCCTATTGACAGTACATGGTACATTTTACTGCATACTCGTACATAGCACATGAAGTCAAATCTGTCCTCGTCAACATGCATATCCCGTCCACTAGATCACGAGCTTGTTCACCATGCCGCGTGAAA
>EF618457_Middle_Europe
TTCATACAGTTTACTGTATATCTACCCTACACATATGCAGTACTAATCCAGCATAAACGTAATGTATGTACATTACATTTTATGATCTACTTCATGTGCACGTACATAATATTAATGTAACAAGGACATAATATGTATATAGTACATTAAACGATTTTCCGCATGCATATTAAGCACGTATATCAGTATTAATGTAATAAGGACATAATATGTATATCGTACATTAAACGATCTTCCTCATGCATATAAGCATGTATAATGCTTCCATTGGCAGTACATAGTACATTTTACTGCATATTCGTACATGGCACATAGAGTCAAATCCATTCTTGCCAACATGCGTATCCCGTCCACTAGATCACGAGCTTGTTGACCATGCCGCGTGAAA
>KR059146_Mediterranean_Europe
TTCATATAGTTTACTGTATATCTACCCTACACATATGCAGTACTAATCCAGCATAAACGTAATGTATGTACATTACATTTTATGATCTACTTCATGTGCGCGTACATAATATTAATGTAACAAGGACATAGTATGTATATAGTACATTAAACGATTTTCCGCATGCATATTAAGCACGTACATCAGTATTAATGTAATAAGGACATAGTATGTATATTGTACATTAAACGATCTTCCCCATGCATATAAGCATGTATAATGCTTCTATCGGCAGTACATAGTACATTTTATTGCATATTCGTACATAGCACATAGAGTCAAATCCGTTCTTGTCAACATGCGTATCCCGTCCACTAGATCACGAGCTTGTTGACCATGCCGCGTGAAA
>KR059147_Middle_Europe
TTCATATAGTTTACTGTATATCTACCCTACACATATGCAGTACTAATCCAGCATAAACGTAATGTATGTACATTACATTTTATGATCTACTTCATGTGTACGTACATAATATTAATGTAACAAGGACATAGTATGTATATAGTACATTAAACGATTTTCCACATGCATATTAAGCACGTACATCAGTATTAATGTAATAAGGACATAATATGTATATTGTACATTAAACGATCTTCCTCATGCATATAAGCATGTATAACGCTTCCATCGACAGTACATAGTACATTTTACTGCATACTCGTACATGGCACATAGAGTCAAATCCATTCTTGCCAACATGCGTATCCCGTCCACTAGATCACGAGCTTGTTGACCATGCCGCGTGAAA
>KR059148_Mediterranean_Europe
TTCATATAGTTTACTGTATATCTACCCTACACATACGCAGTACTAATCCAGCATAAACGTAATGTATGTACATTACATTTTATGATCTACTTCATGTGTACGTACATAATATTAATGTAACAAGGACATAGTATGTATATAGTACATTAAACGATTTTCCACATGCATATTAAGCACGTACATCAGTATTAATGTAATAAGGACATAACATGTATATTGTACATTAAACGATCTTCCTCATGCATATAAGCATGTATAACGCTTCTATCGGCAGTACATAGTACATTTTACTGCATATTCGTACATGGCACATAGAGTCAAATCCATTCTTGCCAACATGCGTATCCCGTCCACTAGATCACGAGCTTGTTGACCATGCCGCGTGAAA
>KR059149_Mediterranean_Europe
TTCATATAGTTTACTGTATATCTACCCTACACATATGCAGTACTAATCCAGCATAAACGTAATGTATGTACATTACATTTTATGATCTACTTCATGTGTACGTACATAATATTAATGTAACAAGGACATAGTATGTATATAGTACATTAAACGATTTTCCACATGCATATTAAGCACGTACATCAGTATTAATGTAATAAGGACATAACATGTATATTGTACATTAAACGATCTTCCTCATGCATATAAGCATGTATAACGCTTCTATCGGCAGTACATAGTACATTTTACTGCATATTCGTACATGGCACATAGAGTCAAATCTATTCTTGCCAACATGCGTATCCCGTCCACTAGATCACGAGCTTGTTGACCATGCCGCGTGAAA
>KR059150_Middle_Europe
TTCATATAGTTTACTGTATATCTACCCTACACATATGCAGTACTAATCCAGCATAAACGTAATGTATGTACATTACATTTTATGATCTACTTCATGTGTACGTACATAATATTAATGTAACAAGGACATAGTATGTATATAGTACATTAAACGATTTTCCACATGCATATTAAGCACGTACATCAATATTAATGTAATAAGGACATAACATGTATATTGTACATTAAACGATCTTCCTCATGCATATAAGCATGTATAACGCTTCTATCGGCAGTACATGGTACATTTTACTGCATATTCGTACATGGCACATAGAGTCAAATCCATTCTTGCCAACATGCGTATCCCGTCCACTAGATCACGAGCTTGTTGACCATGCCGCGTGAAA
>KR059151_Middle_East
TTCATATAGTTTACTGTATATCTACCCTACACATATGCAGTACTAATCCAGCATAAACGTAATGTATGTACATTACATTTTATGATCTACTTCATGTGTACGTACATAATATTAATGTAACAAGGACATAGTATGTATACAGTACATTAAACGATTTTCCACATGCATATTAAGCACGTACATCAGTATTAATGTAATAAGGACATAACATGTATATTGTACATTAAACGATCTTCCCCATGCATATAAGCATGTATAACGCTTCTATCGGCAGTACATAGTACATTTTACTGCATATTCGTACATGGCACATAGAGTCAAATCTATTCTTGCCAACATGCGTATCCCGTCCACTAGATCACGAGCTTGTTGACCATGCCGCGTGAAA
>KR059152_Middle_East
TTCATATAGTTTACTGTATATCTACCCTACACATATGCAGTACTAATCCAGCATAAACGTAATGTATGTACATTACATTTTATGATCTACTTCATGTGTACGTACATAATATTAATGTAACAAGGACATAGTATGTATATAGTACATTAAACGATTTTCCGCATGCATATTAAGCACGTACATCAGTATTAATGTAATAAGGACATAGTATGCATATTGTACATTAAACGATCTTCCTCATGCATATAAGCATGTATAATGTTTCTATCGGCAGTACATAGTACATTCTACTGCATATTCGTACATGGCACATAGAGTCAAATCCGTTCTTGTCAACATGCGTATCCCGTCCACTAGATCACGAGCTTGTTGACCATGCCGCGTGAAA
>KR059155_North_Africa
TTCATATAGTTTACTGTATATCTACCCTACACATATGCAGTACTAATCCAGCATAAACGTAATGTATGTACATTACATTTTATGATCTACTTCATGTGTACGTACATAATATTAATGTAACAAGGACATAGTATGTATATAGTACATTAAACGATTTTCCACATGCATATTAAGCACGTACATCAGTATTAATGTAATAAGGACATAGTATGTATATTGTACATTAAACGATCTTCCTCATGCATATAAGCATGTATAATATTTCTATCGGCAGTACATAGTACATTTTACTGCATATTCGTACATGGCACATAGGGTCAAATCCATTCTTGCCAACATGCGTATCCCGTCCACTAGATCACGAGCTTGTTGACCATGCCGCGTGAAA
>KR059156_Mediterranean_Europe
TTCATATAGTTTACTGTATATCTACCCTACACATATGCAGTACTAATCCAGCATAAACGTAATGTATGTACATTACATTTTATGATCTACTTCATGTGTACGTACATAATATTAATGTAATAAGGACATAGTATGTATATAGTACATTAAACGATTTTCCACATGCATATTAAGCACGTACATCAGTATTAATGTAATAAGGACATAGTATGTATATTGTACATTAAACGATCTTCCTCATGCATATAAGCATGTATAATATTTCTATCGGCAGTACATAGTACATTTTACTGCATATTCGTACATGGCACATAGGGTCAAATCCATTCTTGTCAACATGCGTATCCCGTCCACTAGATCACGAGCTTGTTGACCATGCCGCGTGAAA
>KR059157_North_Africa
TTCATATAGTTTACTGTATATCTACCCTACACATATGCAGTACTAATCCAGCATAAACGTAATGTATGTACATTACATTTTATGATCTACTTCATGTGTACGTACATAATATTAATGTAACAAGGACATAATATGTATATAGTACATTAAACGATTTTCCACATGCATATCAAGCACGTACATCAGTATTAATGTAATAAGGACATAGTATGTATATTGTACATTAAACGATCTTCCTCATGCATATAAGCATGTATAATGTTTCTATCGGCAGTACATAGTACATTTTACTGCATATTCGTACATGGCACATAGAGTCAAATCCATTCTTGCCAACATGCGTATCCCGTCCACTAGATCACGAGCTTGTTGACCATGCCGCGTGAAA
>KR059158_Middle_East
TTCATATAGTTTACTGTATATCTACCCTACACATATGCAGTACTAATCCAGCATAAACGTAATGTATGTACATTACATTTTATGATCTACTTCATGCGTACGTACATAATATTAATGTAACAAGGACATAGTATGTATATAGTACATTAAACGATTTTCCACATGCATATTAAGCACGTACATCAGTATTAATGTAATAAGGACATAGTATGTATATTGTACATTAAACGATCTTCCCCATGCATATAAGCATGTATAATGTTTCTATCGGCAGTACATAGTACATTTTACTGCATATTCGTACATGGCACATAGAGTCAAATCCATTCTTGCCAACATGCGTATCCCGTCCACTAGATCACGAGCTTGCTGACCATGCCGCGTGAAA
>KR059159_North_Africa
TTCATATAGTTTACTGTATATCTACCCTACACATATGCAGTACTAATCCAGCATAAACGTAATGTATGAACATTACATTTTATGATCTACTTCATGTGTACGTACATAATATTAATGTAACAAGGACATAATATGTATATAGTACATTAAACGATTTTCCACATGCATGTTAAGCACGTACATCAGTATTAATGTAATAAGGACATAGTATGTATATCGTACATTAAACGATCTTCCCCATGCATATAAGCATGTATAATGTTTCTATCGACAGTACATAGTACATTTTACTGCATATTCGTACATGGCACATAAAGTCAAATCCATTCTTGCCAACATGCGTATCCCGTCCACTAGATCACGAGCTTGTTGACCATGCCGCGTGAAA
>KR059160_Middle_East
TTCATATAGTTTACTGTATATCTACCCTACACATATGCAGTACTAATCCAGCATAAACGTAATGTATGTACATTACATTTTATGATCTACTTCATGTGTACGTACATAATATTAATGTAACAAGGACATAGTATGTATATAGTACATTAAACGATTTTCCACATGCATATTAAGCACGTACATCAGTATTAATGTAATAAGGACATAGTATGTATACTGTACATTAAACGATCTTCCCCATGCATATAAGCATGTATAATATTTCTATCGGCAGTACATAGTACATTTTACTGCATATTCGTACATGGCACATAGAGTCAAATCCATCCTTGCCAACATGCGTATCCCGTCCATTAGATCACGAGCTTGTTGACCATGCCGCGTGAAA
>KR059161_Middle_East
TTCATATAGTTTACTGTATATCTACCCTACACATATGCAGTACTAATCCAGCATAAACGTAATGTATGTACATTACATTTTATGATCTACTTCATGTGTACGTACATAATATTAATGTAACGAGGACATAGTATGTATATAGTACATTAAACGATTTTCCACATGCATATTAAGCACGTACATCAGTATTAATGTAATAAGGACATAGTATGTATATTGTACATTAAACGATCTTCCTCATGCATATAAGCATGTATAATGTTTCTATCGGCAGTACATAGTACATTTTACTGCATATTCGTACATAGCACATAGAGTCAAATCCATTCTTGCCAACATGCGTATCCCGTCCACTAGATCACGAGCTTGTTGACCATGCCGCGTGAAA
>KR059162_Mediterranean_Europe
TTCATATAGTTTACTGTATATCTACCCTACACATATGCAGTACTAATCCAGCATAAACGTAATGTATGTACATTACATTTTATGATCTACTTCATGTGTACGTACATAATATTAATGTAACAAGGACATAGTATGTATATAGTACATTAAACGATTTTCCACATGCATATTAAGCACGTACATCAGTATTAATGTAATAAGGACATAATATGTATATTGTACATTAAACGATCTTCCCCATGCATATAAGCATGTATAATGTTTCTATCGACAGTACATAGTACATTTTACTGCATATTCGTACATGGCACATAGAGTCAAATCCATTCTTGCCAACATGCGTATCCCGTCCACTAGATCACGAGCTTGTTGACCATGCCGCGTGAAA
>KR059163_Mediterranean_Europe
TTCATATAGTTTACTGTATATCTACCCTACACATATGCAGTACTAATCCAGCATAAACGTAATGTATGTACATTACATTTTATGATCTACTTCATGTGTACGTACATAATATTAATGTAACAAGGACATAGTATGTATATAGTACATTAAACGATTTTCCACATGCATATTAAGCACGTACATCAGTATTAATGTAATAAAGACATAGTATGTATATCGTACATTAAACGATCTTCCTCATGCATATAAGCATGTACAATGTTTCTATCGACAGTACATAGTACATTTTACTGCATATTCGTACATGGCACATAGAGTCAAATCCATTCTTGCCAACATGCGTATCCCGTCCACTAGATCACGAGCTTGTTGACCATGCCGCGTGAAA
>KR059164_Mediterranean_Europe
TTCATATAGTTTACTGTATATCTACCCTACACATATGCAGTACTAATCCAGCATAAACGTAATGTATGTACATTACATTTTATGATCTACTTCATGTGTACGTACATAATATTAATGTAACAAGGACATAGTATGTATATAGTACATTAAACGATTTTCCACATGCATATTAAGCACGTACATCAGTATTAATGTAATAAAGACATAGTATGTATATCGTACATTAAACGATCTTCCTCATGCATATAAGCATGTACAATGTTTCTATCGGCAGTACATAGTACATTTTACTGCACATTCGTACATGGCACATAGAGTCAAATCCATTCTTGTCAACATGCGTATCCCGTCCACTAGATCACGAGCTTGTTGACCATGCCGCGTGAAA
>KR059175_Middle_East
TTCATATAGTTTACTGTATATCTACCCTACACATATGCAGTACTAATCCAGCATAAACGTAATGTATGTACATTACATTTTATGATCTACTTCATGTGTACGTACATAATATTAATGTAACAAGGACATAGTATGTATATAGTACATTAAACGATTTTCCGCATGCATATTAAGCACGTACATCAGTATTAATGTAATAAGGACATAACATGTATATTGTACATTAAACGATCTTCCCCATGCATATAAGCATGTATAACGCTTCTATCGGCAGTACATAGTACATTTTACTGCATATTCGTACATGGCACATAAAGTCAAATCCATTCTTGCCAACATGCATATCCCGCCCACTAGATCACGAGCTTGTTGACCATGCCGCGTGAAA
>KR059176_Mediterranean_Europe
TTCATATAGTTTACTGTATATCTACCCTACACATATGCAGTACTAATCCAGCATAAACGTAATGTATGTACATTACATTTTATGATCTACTTCATGTGCACGTACATAATATTAATGTAACAAGGACATAATATGTATATAGTACATTAAACGATTTTCCACATGCATATTAAGTACGTACATCAGTATTAATGTAATAAGGACATAATATGTATATTGTACATTAAACGATCTTCCTCATGCATATAAGCATGTATAATACCTCTATTGGCAGTACATAGTACATTTTACTGCATATTCGTACATGGCACATAGAGTCAAATCCATTCTTGCCAACATGCGTATCCCGTCCACTAGATCACGAGCTTGTTGACCATGCCGCGTGAAA
>KR059177_Mediterranean_Europe
TTCATATAGTTTACTGTATATCTACCCTACACATATGCAGTACTAATCCAGCATAAACGTAATGTATGTACATTACATTTTATGATCTACTTCATGTGCACGTACATAATATTAATGTAACAAGGACATAGTATGTATATAGTACATTAAACGATTTTCCACATGCATATTAAGCACGTACATCAGTATTAATGTAATAAGGACATAATATGTATATTGTACATTAAACGATCTTCCTCATGCATATAAGCATGTATAATGCCTCTATTGGCAGTACATAGTACATTTTACTGCATATTCGTACATGGCACATAGAGTCAAATCCATTCTTGCCAACATGCGTATCCCGTCCACTAGATCACGAGCTTGTTGACCATGCCGCGTGAAA
>KR059178_Middle_East
TTCATATAGTTTACTGTATATCTACCCTACACATATGCAGTACTAATCCAGCATAAACGTAATGTATGTACATTACATTTTATGATCTACTTCATGTGTACGTACATAATATTAATGTAACAAGGACATAGTATGTATATAGTACATTAAACGATTTTCCACATGCATATTAAGCACGTACATCAGTATTAATGTAGTAAGGACATAATATGTATATTGTACATTAAACGATCTTCCTCATGCATATAAGCATGTATAATGCTTCTATCGGCAGTACATAGTACATTTTACTGCATATTCGTACATGGCACATAGAGTCAAATCCATTCTTGTCAACATGCGTATCCCGTCCATTAGATCACGAGCTTGTTGACCATGCCGCGTGAAA
>KR059179_Middle_East
TTCATATAGTTTACTGTATATCTACCCTACACATATGCAGTACTAATCCAGCATAAACGTAATGTATGTACATTACATTTTATGATCTACTTCATGTGTACGTACATAATATTAATGTAACAAGGACATAGTATGTATATAGTACATTAAACGATTTTCCACATGCATATTAAGCACGTACATCAGTATTAATGTAATAAGGACATAGTATGTATATTGTACATTAAACGATCTCCCTCATGCATATAAGCATGTATAATGCTTCTATCGGCAGTACATAGTACATTTTACTGCATATTCGTACATGGCACATAGAGTCAAATCCATTCTTGCCAACATGCGTATCCCGTCCATTAGATCACGAGCTTGTTGACCATGCCGCGTGAAA
>KR059180_Middle_Europe
TTCATATAGTTTACTGTATATCTACCCTACACATATGCAGTACTAATCCAGCATAAACGTAATGTATGTACATTACATTTTATGATCTACTTCATGTGCACGTACATAATATTAATGTAACAAGGACATAGTATGTATATAGTACATTAAACGATTTTCCACATGCATATCAAGCACGTACATCAGTATTAATGTAATAAGGACATAATATGTATATCGTACATTAAACGATCTTCCCCATGCATATAAGCATGTATAATGCCTCTATTGGCAGTACATAGTACATTTTACTGCATACTCGTACATGGCACATAGAGTCAAATCCATTCTTGCCAACATGCGTATCCCGTCCACTAGATCACGAGCTTGTTGACCATGCCGCGTGAAA
>KR059181_Middle_Europe
TTCACATAGTTTACTGTATATCTACCCTACACATATGCAGTACTAATCCAGCATAAACGTAATGTATGTACATTACATTTTATGATCTACTTCATGTGCACGTACATAATATTAATGTAACAAGGACATAGTATGTATATAGTACATTAAACGATTTTCCACATGCATATTAAGCACGTACATCAGTATTAATGTAATAAGGACATAATATGTATATTGTACATTAAACGATCTTCCTCATGCATATAAGCATGTATAATGCCTCTATTGGCAGTACATAGTACATTTTACTGCATATTCGTACATGGCACATAGAGTCAAATCCATTCTTGCCAACATGCGTATCCCGTCCATTAGATCACGAGCTTGTTGACCATGCCGCGTGAAA
>KR059183_Middle_East
TTCATATAGTTTACTGTATATCTACCCTACACATATGCAGTACTAATCCAGCATAAACGTAATGTATGTACATTACATTTTATGATCTACTTCATGTGTACGTACATAATATTAATGTAACAAGGACATAGTATGTATATAGTACATTAAACGATTTTCCACATGCATATTAAGTACGTACATCAGTATTAATGTAATAAGGACATAGTATGTATATTGTACATTAAACGATCTTCCTCATGCATATAAGCATGTACAATACTTCTATCGACAGTACATAGTACATTTTACTGCATATTCGTACATGGCACATAGAGTCAAATCCATTCTTGCCAACATGCGTATCCCGTCCATTAGATCACGAGCTTGTTGACCATGCCGCGTGAAA
>KR059184_Middle_East
TTCATATAGTTTACTGTATATCTACCCTACACATATGCAGTACTAATCCAGCATAAACGTAATGTATGTACATTACATTTTATGATCTACTTCATGTGTACGTACATAATATTAATGTAACAAGGACATAGTATGTATATAGTACATTAAACGATTTTCCACATGCATATTAAGCACGTACATCAGTATTAATGTAATAAGGACATAGTATGTATATTGTACATTAAACGATCTTCCCCATGCATATAAGCATGTATAATACTTCTATCGACAGTACATAGTACATTTTACTGCATATTCGTACATGGCACATAGAGTCAAATCCATTCTTGCCAACATGCGTATCCCGTCCATTAGATCACGAGCTTGTTGACCATGCCGCGTGAAA
>KR059185_Mediterranean_Europe
TTCATATAGTTTACTGTATATCTACCCTACACATATGCAGTACTAATCCAGCATAAACGTAATGTATGTACATTACATTTTATGATCTACTTCATGTGTACGTACATAATATTAATGTAACAAGGACATAATATGTATATAGTACATTAAACGATTTTCCACATGCATATTAAGCACGTACATCAGTATTAATGTAATAAGGACATAGTATGTATATTGTACATTAAACGATCTTCCTCATGCATATAAGCATGTATAATGTTTCCATCAGCAGTACATAGTACATTTTACTGCATATTCGTACATAGCACATAGAGTCAAATCCACCCTTGTCAACATGCGTATCCCGTCCACTAGATCACGAGCTTGTTGACCATGCCGCGTGAAA
>KR059186_Middle_East
TTCATATAGTTTACTGTATATCTACCCTACACATATGCAGTACTAATCCAGCATAAACGTAATGTATGTACATTACATTTTATGATCTACTTCATGTGTACGTACATAATATTAATGTAACAAGGACATAGTATGTATATAGTACATTAAACGATTTTCCACATGCATATTAAGCACGTACATCAGTATTAATGTAATAAGGACATAGTATGTATATTGTACATTAAACGATCTTCCTCATGCATATAAGCATGTATAATGCTTCTATTGGCAGTACATAGTACATTTTACTGCATATTCGTACATGGCACATAGAGTCAAATCCATTCTTGCCAACATGCGTATCCCGTCCACTAGATCACGAGCTTGTTGACCATGCCGCGTGAAA
>KR059187_Middle_Europe
TTCATATAGTTTACTGTATATCTACCCTACACATATGCAGTACTAATCCAGCATAAACGTAATGTATGTACATTACATTTTATGATCTACTTCATGTGCGCGTACATAATATTAATGTAACAAGGACATAGTATGTATATAGTACATTAAACGATTTTCCACATGCATATTAAGCACGTACATTAGTATTAATGTAATAAGGACATAATATGTATATTGTACATTAAACGATCTTCCTCATGCATATAAGCATGTATAATGCCTCTATTGGCAGTACATAGTACATTCTACTGCATATTCGTACATGGCACATAGAGTCAAATCCATTCTCGCCAACATGCGTATCCCGTCCACTAGATCACGAGCTTGTTGACCATGCCGCGTGAAA
>KR059188_North_Africa
TTCATATAGTTTACTGTATATCTACCCTACACATATGCAGTACTAATCCAGCATAAACGTAATGTATGTACATTACATTTTATGATCTACTTCATGTGCACGTACATAATATTAATGTAACAAGGACATAGTATGTATATAGTACATTAAACGATTTTCCACATGCATATTAAGTACGTACATCAGTATTAATGTAATAAGGACATAGTATGTATATCGTACATTAAACGATCTTCCTCATGCATATAAGCATGTATAATGCTTCTATTGACAGTACATAGTACATTTTACTGCATATTCGTACATGGCACATAGAGTCAAATCCATTCTTGCCAACATGCGTATCCTGCCCACTAGATCACGAGCTTGTTGACCATGCCGCGTGAAA
>KR059189_Middle_East
TTCATATAGTTTACTGTATATCTACCCTACACATATGCAGTACTAATCCAGCATAAACGTAATGTATGTACATTACATTTTATGATCTACTTCATGTGTACGTACATAATATTAATGTAACAAGGACATAGTATGTATATAGTACATTAAACGATTTTCCACATGCATATTAAGCACGTACATCAGTATTAATGTAATAAGGACATAATATGTATATTGTACATTAAACGATTTTCCTCATGCATATAAGCATGTATAATGTTTCTATCGACAGTACATAGTACATTTTACTGCATATCCGTACATGGCACATAGAGTCAAATCCATCCTTGTCAACATGCGTATCCCGTCCACTAGATCACGAGCTTGTTGACCATGCCGCGTGAAA
>KR059190_Mediterranean_Europe
TTCATATAGTTTACTGTATATCTACCCTACACATATGCAGTACTAATCCAGCATAAACGTAATGTATGTACATTACATTTTATGATCTACTTCATGTGCACGTACATAATATTAATGTAACAAGGACATAGTATGTATATAGTACATTAAACGATTTTCCACATGCATATTAAGCACGTACATCAGTATTAATGTAATAAGGACATAATATGTATATTGTACATTAAACGATCTTCCTCATGCATATAAGCATGTATAATGCCTCTATTGGCAGTACATAGTACATTTTACTGCATATTCGTACATGGCACATAGAGTCAAATCCATTCTTGCCAACATGCGTATCCCGTCCACTAGATCACGAGCTTGTTGACCATGCCGCGTGAAA
>KR059191_Middle_East
TTCATATAGTTTACTGTATATCTACCCTACACATATGCAGTACTAATCCAGCATAAACGTAATGTATGTACATTACATTTTATGATCTACTTCATGTGTACGTACATAATATTAATGTAATAAGGACATAGTATGTATATAGTACATTAAACGATTTTCCACATGCATATTAAGCACGTATATCAGTATTAATGTAATAAGGACATAGTATGTATATTGTACATTAAACGATCTTCCTCATGCATATAAGCATGTATAATGCTTCTATTGGCAGTACATAGTACATTTTACTGCATATTCGTACATGGCACATAGAGTCAAATCCATTCTTGCCAACATGCGTATCCTGTCCACTAGATCACGAGCTTGTTGACCATGCCGCGTGAAA
>KR059192_Middle_East
TTCATATAGTTTACTGTATATCTACCCTACACATATGCAGTACTAATCCAGCATAAACGTAATGTATGTACATTACATTTTATGATCTACTTCATGTGTACGTACATAATATTAATGTAACAAGGACATAGTATGTATATAGTACATTAAACGATTTTCCACATGCATATTAAGCACGTATATCAGTATTAATGTAATAAGGACATAGTATGTATATTGTACATTAAACGATCTTCCCCATGCATATAAGCATGTATAATGTTTCTATTGGCAGTACATAGTACATTCTACTGCATATTCGTACATGGCACATAGAGTCAAATCCATTCTTGCCAACATGCGTATCCTGTCCACTAGATCACGAGCTTGTTGACCATGCCGCGTGAAA
>KR059193_Mediterranean_Europe
TTCATATAGTTTACTGTATATCTACCCTACACATATGCAGTACTAATCCAGCATAAACGTAATGTATGTACATTACATTTTATGATCTACTTCATGTGCACGTACATAATATTAATGTAACAAGGACATAGTATGTATATAGTACATTAAACGATTTTCCACATGCATATTAAGCACGTACATCAGTATTAATGTAATAAGGACATAGTATGTATATCGTACATTAAACGATCTTCCCCATGCATATAAGCATGTATAATGCCTCTATTGGCAGTACATAGTACATTTTACTGCATATTCGTACATGGCACATAAAGTCAAATCCATTCTTGTCAACATGCGTATCCCGTCCACTAGATCACGAGCTTGTTGACCATGCCGCGTGAAA
>KR059194_Middle_Europe
TTCATATAGTTTACTGTATATCTACCCTACACATATGCAGTACTAATCCAGCATAAACGTAATGTATGTACATTACATTTTATGATCTACTTCATGTGCACGTACATAATATTAATGTAACAAGGACATAGTATGTATATAGTACATTAAACGATTTTCCACATGCATATTAAGCACGTACATCAGTATTAATGTAATAAGGACATAATATGTATATCGTACATTAAACGATCTTCCTCATGCATATAAGCATGTATAATACCTCTATTGGCAGTACATAGTACATTTTACTGCATATTCGTACATGGCACATAGAGTCAAATCCATTCTTGCCAACATGCGTATCCCGTCCACTAGATCACGAGCTTGTTGACCATGCCGCGTGAAA
>KR059195_Mediterranean_Europe
TTCATATAGTTTACTGTATATCTACCCTACACATATGCAGTACTAATCCAGCATAAACGTAATGTATGTACATTACATTTTATGATCTACTTCATGTGCACGTACATAATATTAATGTAACAAGGACATAGTATGTATATAGTACATTAAACGATTTTCCACATGCATATTAAGCACGTACATCAGTATTAATGTAATAAGGACATAGTATGTATATCGTACATTAAACGATCTTCCTCATGCATATAAGCATGTATAATGTCTCCATTGGCAGTACATAGTACATTTTACTGCATATTCGTACATGGCACATAGAGTCAAATCCATTCTTGCCAACATGCGTATCCCGTCCACTAGATCACGAGCTTGTTGACCATGCCGCGTGAAA
>KR059196_Mediterranean_Europe
TTCATATAGTTTACTGTATATCTACCCTACACATATGCAGTACTAATCCAGCATAAACGTAATGTATGTACATTACATTTTATGATCTACTTCATGTGCACGTACATAATATTAATGTAACAAGGACATAGTATGTATATAGTACATTAAACGATTTTCCACATGCATATTAAGCACGTACATCAGTATTAATGTAATAAGGACATAGTATGTATATCGTACATTAAACGATCTTCCTCATGCATATAAGCATGTATAATGCCTCCATTGGCAGTACATAGTACATTTTACTGCATATTCGTACATGGCACATAGAGTCAAATCCATTCTTGCCAACATGCGTATCCCGTCCACTAGATCACGAGCTTGTTGACCATGCCGCGTGAAA
>KR059197_Mediterranean_Europe
TTCATATAGTTTACTGTATATCTACCCTACACATATGCAGTACTAATCCAGCATAAACGTAATGTATGTACATTACATTTTATGATCTACTTCATGTGCACGTACATAATATTAATGTAACAAGGACATAGTATGTATATAGTACATTAAACGATTTTCCACATGCATATTAAGCACGTACATCAGTATTAATGTAATAAAGACATAATATGTATATTGTACATTAAACGATCTTCCTCATGCATATAAGCATGTATAATGTCTCTATTGGCAGTACATAGTACATTTTACTGCATATTCGTACATGGCACATAGAGTCAAATCCATTCTTGCCAACATGCGTATCCCGTCCACTAGATCACGAGCTTGTTGACCATGCCGCGTGAAA
>KR059198_Middle_Europe
TTCATATAGTTTACTGTATATCTACCCTACACATATGCAGTACTAATCCAGCATAAACGTAATGTATGTACATTACATTTTATGATCTACTTCATGTATACGTACATAATATTAATGTAACAAAGACATAGTATGTATATAGTACATTAAACGATTTTCCGCATGCATATTAAGCACGTACATCAGTATTAATGTAATAAGGACATAACATGTATATTGTACATTAAACGATCTTCCTCATGCATATAAGCATGTATAACGCTTCTATCGACAGTACATAGTACATTTTACTGCATATTCGTACATGGCACATAGAGTCAAATCCATTCTTGCCAACATGCGTATCCCGTCCACTAGATCACGAGCTTGTTGACCATGCCGCGTGAAA
>KR059199_Middle_East
TTCATATAGTTTACTGTATATCTACCCTACACATATGCAGTACTAATCCAGCATAAACGTAATGTATGTACATTACATTTTATGATCTACTTCATGTGTACGTACATAATATTAATGTAACAAGGACATAGTATGTATATAGTACATTAAACGATTTTCCACATGCATATTAAGCACGTACATCAGTATTAATGTAATAAGGACATAATATGTATATCGTACATTAAACGATCTTCCTCATGCATATAAGCATGTATAATGCTTCTATCGACAGTACATAGTACATTTTACTGCATATTCGTACATAGCACATAGAGTCAAATCCATTCTTGTCAACATGCGTATCCCGTCCACTAGATCACGAGCTTGTTGACCATGCCGCGTGAAA
>KR059200_Middle_East
TTCATATAGTTTACTGTATATCTACCCTACACATATGCAGTACTAATCCAGCATAAACGTAATGTATGTACATTACATTTTATGATCTACTTCATGTGTACGTACATAATATTAATGTAACAAGGACATAGTATGTATATAGTACATTAAACGATTTTCCGCATGCATATTAAGCACGTACATCAATATTAATGTAATAAAGACATAATATGTATATTGTACATTAAACGATCTTCCTCATGCATATAAGCATGTATAATGTTTCTATCGGTAGTACATAGTACATTTTACTGCATATTCGTACATGGCACATAGAGTCAAATCTATTCTTGCCAACATGCGTATCCCGTCCACTAGATCACGAGCTTGTTGACCATGCCGCGTGAAA
>KR059201_Middle_East
TTCATATAGTTTACTGTATATCTACCCTACACATATGCAGTACTAATCCAGCATAAACGTAATGTATGTACATTACATTTTATGATCTACTTCATGTGTACGTACATAATATTAATGTAACAAGGACATAGTATGTATATAGTACATTAAACGATTTTCCACATGCATATTAGGTACGTACATCAGTATTAATGTAATAAGGACATAGTATGTATATTGTACATTAAACGATCTTCCTCATGCATATAAGCATGTATAATGCTTCTATCGGCAGTACATAGTACATTTTACTGCATATTCGTACATGGCACATAGAGTCAAATCCATTCCTGCCAACATGCGTATCCCGTCCACTAGATCACGAGCTTGTTGACCATGCCGCGTGAAA
>KR059210_Middle_East_HGD
TTCATATAGTTTACTGTATATCTACCCTACACATATGCAGTACTAATCCAGCATAAACATAATGTATGTACATTACATTTTATGATCTACTTCACGTATATGTACATAATATTAATGTAACAAGGACATAGTATGTATATAGTACATTAAACGATTTTCCGCATGCATATTAGGCACGTACATCAGTGTTAATGTAATAAGGACATAATATGTATATCGTACATTAAACGATCTTCCCCATGCATATAAGCATGTACAATGTTTCCATTGGCAGTACATAGTACATTCTACTGTATATTCGTACATGGCACATAAAGTCAAATCCGTCCTTGTCAACATGCGTATCCCGCCCACTAGATCACGAGCTTGTTGACCATGCCGCGTGAAA
>KR059211_Central_Asia_HGD
TTCATATAGTTTACTGTATATCTACCCTACACATATGCAGTACTAATCCAGCATAAACATAATGTATGTACATTACATTTTATGATCTACTTCACGTATACGTACATAATATTAATGTAACAAGGACATAGTATGTATACAGTACATTAAACGATTTTCCGCATGCATATTAAGCATGTACATCAGTATTAATGTAATGAAGACATAATATGTATATCGTACATTAAACGATCTTCCTCATGCATATAAGCATGTACAATACTTCCATTGACAGTACATAGTACATTTTACTGTATATTCGTACATAGCACATAAAGTCAAATCCGTTCTTGCCAACATGCGTATCCCGCCCACTAGATCACGAGCTTGTTGACCATGCCGCGTGAAA
>KR059212_Central_Asia_HGD
TTCATATAGTTTACTGTATATCTACCCTACACATATGCAGTACTAATCCAGCATAAACATAATGTATGTACATTACATTTTATGATCTACTTCACGTATACGTACATAATATTAATGTAACAAGGACATAGTATGTATACAGTACATTAAACGATTTTCCGCATGCATATTAAGCATGTACATCAGTATTAATGTAATGAAGACATAATATGTATATCGTACATTAAACGATCTTCCTCATGCATATAAGCATGTACAATACTTCCATTGACAGTACATAGTACATTTTACTGTATATTCGTACATAGCACATAAAGTCAAATCCGTTCTTGCCAACATGCGTATCCCGCCCACTAGATCACGAGCTTGTTGACCATGCCGCGTGAAA
>KR059214_Middle_East_HGG
TTCATATAGTTTACTGTATATCTACCCTACACATATGCAGTACTAATCCAGCATAAACGTAATGTATGTACATTACATTTTATGATCTACTTCACGTGTATGTACATAATATTAATGTAACAAGGACATGGTATGTATATAGTACATTAAACGATTTTCCGCATGCATATTAAGCACGTATATCAGTATTAATGTAATAAAGACATAATATGTATATCGTACATTAAACGATTCCCCCCATGCATATAAGCATGTACAATATCTCTATTGACAGTACATAGTACATTCTACTGTACATTCGTACATGGCACATAAAGTCAAATCCATTCTTGCCAACATGCGTATCCCGTCCACTAGATCACGAGCTTGTCGACCATGCCGCGTGAAA
>KR059216_Middle_East_HGG
TTCATATAGTTTACTGTATATCTACCCTACACATATGCAGTACTAATCCAGCATAAACGTAATGTATGTACATTACATTTTATGATCTACTTCACGTGTATGTACATAATATTAATGTAACAAGGACATGGTATGTATATAGTACATTAAACGATTTTCCGCATGCATATTAAGCACGTACATTAGTATTAATGTAATAAAGACATAATATGTATATCGTACATTAAACGATCTCCCCCATGCATATAAGCATGTACAGTATCTCTATTGACAGTACATAGTACATTCTACTGTATATTCGTACATAGCACATAGAGTCAAATCCATTCTTGTCAACATGCGTATCCCGTCCACTAGATCACGAGCTTGTCGACCATGCCGCGTGAAA
>KR059217_Middle_East_HGG
TTCATATAGTTTACTGTATATCTACCCTACACATATGCAGTACTAATCCAGCATAAACGTAATGTATGTACATTACATTTTATGATCTACTTCACGTGTATGTACATAATATTAATGTAACAAGGACATGGTATGTATATAGTACATTAAACGATTTTCCACATGCATATTAAGCACGTATATTAGTATTAATGTAATAAAGACATAATATGTATATCGTACATTAAACGATCTCCCCCATGCATATAAGCATGTACAATATCTCTATTGACAGTACATAGTACATTCTACTGTATATTCGTACATAGCACATAGAGTCAAATCCATTCTCGCCAACATGCGTATCCTGTCCACTAGATCGCGAGCTTGTCGACCATGCCGCGTGAAA
>KR059219_middle_East_HGB
TTCATATAGTTTACTATATATCTACCCTACACATATGCAGTACTAATCCAGCATAAACGTAATATATGTACATTACATTTTATGATCTACTTCACGTGTACGTACATAATATTAATGTAATGAGGACATAATATGTATATAGTACATTAAACGATTTTCCACATGCATATTAAGCACGTATATCAGTATTAATGTAATAAAGACATAATATGTATATCGTACATTAAACGATTTCCCCCATGCATATAAGCATGTACAATGTCCCTATTAACAGTACATGGTACATTCTATTGTATATTCGTACATGGCACATAAAGTCAAATCTATTCTTGTCAACATGCGTATCCCGCCCACTAGATCACGAGCTTGTCGACCATGCCGCGTGAAA
>KR059220_East_Asia_HGB
TTCATATAGTTTACTATATATCTACCCTACACATGTGCAGTACTAATCCAGCATAAACGTAATGTATGTACATTACATTTTATGATCTACTTCACGTGTACGTACATAATATTAATGTAACAAGGACATAATATGTATATAGTACATTAAACGATTTTCCACATGCATATTAAGCACGTATATCAGTATTAATGTAATAAAGACATAATATGTATATCGTACATTAAACGATCTCCCCCATGCATATAAGCACGTACAATGTCCTTATTAGCAGTACATGGTACATTTTACTGTATACCCGTACATAGCACATAAAGTCAAATCCATTCTTGTCAACATGCGTATCCCGTCCACTAGATCACGAGCTTGTCGACCATGCCGCGTGAAA
>KR059221_Middle_East_HGB
TTCATATAGTTTACTATATATCTACCCTACACATATGCAGTACTAATCCAGCATAAACGTAATGTATGTACATTACATTTTATGGTCTACTTCACGTGTACGTACATAATATTAATGTAACAAGGACATAATATGTATATAGTACATTAAACGATTTTCCACATGCATATTAAGCACGTATATCAGTATTAATGTAATAAAGACATAATATGTATATCGTACATTAAACGATCTCCCCCATGCATATAAGCACGTACAATGTCCTTATTAGCAGTACATGGTACATTTTACTGTATACCCGTACATAGCACATAAAGTCAAATCTATCCTTGTCAACATGCGTATCCCGTCCACTAGATCACGAGCTTGTCGACCATGCCGCGTGAAA
>KR059222_Middle_East_HGC
TTCATATAATTTACTATATATCTACCCTACATATATGCAGTACTAATCCAACATAAACGTAATGTATGTACATTACATTTTATGGTCTACTTCACGTGCACGTACATAATATTAATGTAACAAGGACATAATATGTATATAGTACATTAAATGGTTTTCCACATGCATATTAAGTACGTACATCAGTATTAATGTAGTAAGGACATAATATGTATATCGTACATTAAACGATCTTCCCCATGCATATAAGCATGTACAGTATCCCTATCGACAGTACANGGCACATTTTACTGTATACCCGTACATAGCACATAAAGTCAAATCCGTCCTCGTCAACATGCATATCCCGTCCACTAGATCACGAGCTTATTCACCATGCCGCGTGAAA
>KR059223_Middle_Europe_HGC
TTCATATAGTTTACTATATATCTACCCTACATATATGCAGTACTAATCCAACATAAACATAATGTATGTACATTACATTTTATGGTCTACTTCACGTGTACGTACATAACATTAATGTAACAAGGACATAATATGTATACAGTACATTAGATGGTTTCCCACATGCATATTAAGCACGTACATCAGTATTAATGTAGTAAGGACATAATATGTATATTGTACATTAAACGATCTTCCCCATGCATATAAGCATGTACAATATCCCTATCGATAGTACATGGCACATTCTATTGTATATTCGTACATAGCGCATGAAGTCAAATCCGTCCTTGCCAACATGCATATCCCGTCCACTAGATCACGAGCTTGTTCACCATGCCGCGTGAAA
>KR059224_Middle_Europe_HGC
TTCATATAGTTTACTATATATCTACCCTACATATATGCAGTACTAATCCAACATAAACATAATGTATGTACATTACATTTTATGGTCTACTTCACGTGTACGTACATAACATTAATGTAACAAGGACATAATATGTATATAGTACATTAGATGGTTTCCCACATGCATATTAAGCACGTACATCAGTATTAATGTAATAAGGACATAATATGTATATTGTACATTAAACGATCTTCCCCATGCATATAAGCATGTACAATATCCCTATCGATAGTACATGGCACATTCTATTGTATACCCGTACATAGCGCATGAAGTCAAATCCGTCCTCGTCAACATGCATATCCCGCCCACTAGATCACGAGCTTGTTCACCATGCCGCGTGAAA
>KR059225_Mediterranean_Europe_HGC
TTCATATAGTTTACTATATATCTACCCTACATATATGCAGTACTAATCCAACATAAACATAATGTATGTACATTACATTTTATGGTCTACTTCACGTGTACGTACATAACATTAATGTAACAAGGACATAATATGTATATAGTACATTAGATGGTTTCCCACATGCATATTAAGCACGTACATCAGTATTAATGTAGTAAGGACATAATATGTATATCGTACATTAAACGATCTCCCCCATGCATATAAGCATGTACAATATCCCTATCGATAGTACATGGCACATTCTATTGTATACTCGTACATAGCGCATGAAGTCAAATCCGTCCTTGTCAACATGCATATCCCGTCCACTAGATCACGAGCTTGTTCACCATGCCGCGTGAAA
>KR059226_C.aegagrus_Middle_East_HGF
TTCATATAGTTTATTATATATCTACCCTACATATATGCCATACCAGTCCAGCATAAACATGGCGTATATATATTACATTTTATGATCTATTTCGCGTGTGCATACATAGTATTAATGTAATAAAGACATGATATGTATATAGTACATTGAATGGCTTTCCGCATGCATATTAAGCACGTACATTAATATTAATGTAGTAAGGACATAGTATGTATATCGTACATTAAACGATTTTCCCCATGCATATAAGCATGTACAGTATTCCTATTGATAGTACATAGTACATTTTGCTGTATGTTCGTACATAGCACATAAAGTCAAATCCGTCCTTGTCAACATGCATATCCCGTCCATTAGATCACGAGCTTGTTGACCATGCCGCGTGAAA
>KR059227_North_Africa
TTCATATAGTTTACTGTATATCTACCCTACACATATGCAGTGCTAATCCAGCATAAACGTAATGTATGTACATTACATTTTATGATCTACTTCATGTGTACGTACATAGTATTAATGTAACAAGGACATAGTATGTATATAGTACATTAAACGATTTTCCACATGCATATTAAGCACGTACATCAGTATTAATGTAATAAGGACATAATATGTATATTGTACATTAAACGATCTTCCTCATGCATATAAGCATGTATAATGTTTCTATCGGCAGTACATAGTACATTTTACTGCATATTCGTACATGGCACATAGAGTCAAATCCATTCTTGTCAACATGCGTATCCCGTCCACTAGATCACGAGCTTGTTGACCATGCCGCGTGAAA
>KR059228_North_Africa
TTCATATAGTTTACTGTATATCTACCCTACACATATGCAGTGCTAATCCAGCATAAACGTAATGTATGTACATTACATTTTATGATCTACTTCATGTGTACGTACATAGTATTAATGTAACAAGGACATAGTATGTATATAGTACATTAAACGATTTTCCACATGCATATTAAGCACGTACATCAGTATTAATGTAATAAGGACATAATATGTATATTGTACATTAAACGATCTTCCTCATGCATATAAGCATGTATAATGTTTCTATCGGCAGTACATAGTACATTTTACTGCATATTCGTACATGGCACATAGAGTCAAATCCATTCTTGTCAACATGCGTATCCCGTCCACTAGATCACGAGCTTGTTGACCATGCCGCGTGAAA
>KR059229_North_Africa
TTCATATAGTTTACTGTATATCTACCCTACACATATGCAGTACTAATCCAGCATAAACGTAATGTATGTACATTACATTTTATGATCTACTTCATGTGCACGTACATAATATTAATGTAACAAGGACATAGTATGTATATAGTACATTAAACGATTTTCCACATGCATATTAAGCACGTACATCAGTATTAATGTAATAAGGACATAATATGTATATCGTACATTAAACGATCTTCCCCATGCATATAAGCATGTATAATACCTCTATTGGCAGTACATAGTACATTTTACTGCATATTCGTACATGGCACATAGAGTCAAATCCATTCTTGCCAACATGCGTATCCCGTCCACTAGATCACGAGCTTGTTGACCATGCCGCGTGAAA
>KR059251_North_Africa
TTCATATAGTTTACTGTATATCTACCCTACACATATGCAGTACTAATCCAGCATAAACGTAATGTATGTACATTACATTTTATGATCTACTTCATGTGTACGTACATAATATTAATGTAACAAGGACATAATATGTATATAGTACATTAAACGATTTTCCGCATGCATATTAAGCACGTACATCAGTATTAATGTAATAAGGACATAATATGTATATTGTACATTAAACGATCTTCCTCATGCATATAAGCACGTATAATGTTTCTATCGGCAGTACATAGTACATTTTACTGCATATTCGTACATGGCACATAGAGTCAAATCCATTCTTGCCAACATGCGTATCCCGTCCACTAGATCACGAGCTTGTTGACCATGCCGCGTGAAA
>KR059252_North_Africa
TTCATATAATTTACTGTATATCTACCCTACACATATGCAGTACTAATCCAGCATAAACGTAATGTATGTACATTACATTTTATGATCTACTTCATGTGTACGTACATAATATTAATGTAACAAGGACATAGTATGTATATAGTACATTAAACGATTTTCCACATGCATATTAAGCACGTACATCAGTATTAATGTAATAAAGACATAATATGTATATTGTACATTAAACGATCTTCCTCATGCATATAAGCATGTATAATATTCCTATCGGCAGTACATAGTACATTTTACTGCATATTCGTACATGGCACATAGAGTCAAATCCATTCTTGCCAACATGCGTATCCCGTCCACTAGATCACGAGCTTGTTGACCATGCCGCGTGAAA
>KR059267_Mediterranean_Europe
TTCATATAGTTTACTGTATATCTACCCTACACATATGCAGTACTAATCCAGCATAAACGTAATGTATGTACATTACATTTTATGATCTACTTCATGTGCACGTACATAATATTAATGTAACAAGGACATAGCATGTATATAGTACATTAAACGATTTTCCACATGCATATTAAGCACGTACATTAGTATTAATGTAATAAAGACATAGTATGTATATCGTACATTAAACGATCTTCCCCATGCATATAAGCATGTACAATGCTTCTATCGGCAGTACATAGTACATTTTACTGCATATTCGTACATAGCACATAGAGTCAAATCCATTCTTGCCAACATGCGTATCCCGTCCGCTAGATCACGAGCTTGTTGACCATGCCGCGTGAAA
>KR059268_Mediterranean_Europe
TTCATATAGTTTACTGTATATCTACCCTACACATATGCAGTACTAATCCAGCATAAACGTAATGTATGTACATTACATTTTATGATCTACTTCATGTGCACGTACATAATATTAATGTAACAAGGACATAGCATGTATATAGTACATTAAACGATTTTCCACATGCATATTAAGCACGTACATTAGTATTAATGTAATAAAGACATAGTATGTATATCGTACATTAAACGATCTTCCCCATGCATATAAGCATGTACAATGCTTCTATCGGCAGTACATAGTACATTTTACTGCATATTCGTACATAGCACATAGAGTCAAATCCATTCTTGCCAACATGCGTATCCCGTCCACTAGATCACGAGCTTGTTGACCATGCCGCGTGAAA
>KR059269_Mediterranean_Europe
TTCATATAGTTTACTGTATATCTACCCTACACATATGCAGTACTAATCCAGCATAAACGTAATGTATGTACATTACATTTTATGATCTACTTCATGTGCACGTACATAATATTAATGTAACAAGGACATAGCATGTATATAGTACATTAAACGATTTTCCACATGCATATTAAGCACGTACATTAGTATTAATGTAATAAAGACATAGTATGTATATCGTACATTAAACGATCTTCCCCATGCATATAAGCATGTACAATGCTTCTATCGGCAGTACATAGTACATTTTACTGCATATTCGTACATAGCACATAGAGTCAAATCCATTCTTGCCAACATGCGTATCCCGTCCACTAGATCACGAGCTTGTTGACCATGCCGCGTGAAA
>KR059270_Mediterranean_Europe
TTCATATAGTTTACTGTATATCTACCCTACACATATGCAGTACTAATCCAGCATAAACGTAATGTATGTACATTACATTTTATGATCTACTTCATGTGCACGTACATAATATTAATGTAACAAGGACATAGCATGTATATAGTACATTAAACGATTTTCCACATGCATATTAAGCACGTACATTAGTATTAATGTAATAAAGACATAGTATGTATATCGTACATTAAACGATCTTCCCCATGCATATAAGCATGTACAATGCTTCTATCGGCAGTACATAGTACATTTTACTGCATATTCGTACATAGCACATAGAGTCAAATCCATTCTTGCCAACATGCGTATCCCGTCCACTAGATCACGAGCTTGTTGACCATGCCGCGTGAAA
>KR059280_North_Africa
TTCATATAGTTTACTGTATATCTACCCTACACATATGCAGTACTAATCCAGCATAAACGTAATGTATGTACATTACATTTTATGATCTACTTCATGTGTACGTACATAATATTAATGTAACAAGGACATAGTATGTATATAGTACATTAAACGATTTTCCACATGCATATTAAGCACGTACATCAGTATTAATGTAATAAGGACATAGTATGTATATCGTACATTAAACGATCTTCCTCATGCATATAAGCATGTATAATGTTTCTATCGGCAGTACATAGTACATTTTACTGCATATTCGTACATGGCACATAGAGTCAAATCCATTCTTGTCAACATGCGTATCCCGTCCACTAGATCACGAGCTTGTTGACCATGCCGCGTGAAA
>KR059281_North_Africa
TTCATATAGTTTACTGTATATCTACCCTACACATATGCAGTACTAATCCAGCATAAACGTAATGTATGTACATTACATTTTATGATCTACTTCATGTGTACGTACATAATATTAATGTAACAAGGACATAGTATGTATATAGTACATTAAACGATTTTCCACATGCATATTAAGCGCGTACATCAGTATTAATGTAATAAGGACATAGTATGTATACTGTACATTAAACGATCTTCCCCATGCATATAAGCATGTATAATGTTTCTATCGGCAGTACATAGTACATTTTACTGCATATTCGTACATAGCACATAGAGTCAAATCCATTCTTGTCAACATGCGTATCCCGTCCACTAGATCACGAGCTTGTTGACCATGCCGCGTGAAA
>KR059282_North_Africa
TTCATATAGTTTACTGTATATCTACCCTACACATATGCAGTACTAATCCAGCATAAACGTAATGTATGTACATTACATTTTATGATCTACTTCATGTGTACGTACATAATATTAATGTAACAAGGACATAGTATGTATATAGTACATTAAACGATTTTCCACATGCATATTAAGCGCGTACATCAGTATTAATGTAATAAGGACATAATATGTATATTGTACATTAAACGATCTTCCCCATGCATATAAGCATGTATAATGTTTCTATCGGCAGTACATAGTACATTTTACTGCATATTCGTACATAGCACATAGAGTCAAATCCATTCTTGTCAACATGCGTATCCCGTCCACTAGATCACGAGCTTGTTGACCATGCCGCGTGAAA
>KR059283_North_Africa
TTCATATAGTTTACTGTATATCTACCCTACACATATGCAGTACTAATCCAGCATAAACGTAATGTATGTACATTACATTTTATGATCTACTTCATGTGTACGTACATAATATTAATGTAACAAGGACATAGTATGTATATAGTACATTAAACGATTTTCCACATGCATATTAAGCGCGTACATCAGTATTAATGTAATAAGGACATAGTATGTATACTGTACATTAAACGATCTTCCCCATGCATATAAGCATGTATAATGTTTCTATCGGCAGTACATAGTACATTTTACTGCATATTCGTACATAGCACATAGAGTCAAATCCATTCTTGTCAACATGCGTATCCCGTCCACTAGATCACGAGCTTGTTGACCATGCCGCGTGAAA
>KR059284_North_Africa
TTCATATAGTTTACTGTATATCTACCCTACACATATGCAGTACTAATCCAGCATGAACGCAATGTATGTACATTACATTTTATGATCTACTTCATGTGTACGTACATAATATTAATGTAATAAGGACATAGTATGTATATAGTACATTAAACGATTTTCCACATGCATATTAAGCACGTATATCAGTATTAATGTAATAAGGACATAGTATGTATATCGTACATTAAACGATCTTCCTCATGCATATAAGCATGTATAATGTTTCTACCGGCAGTACATAGTACATTTTACTGCATATTCGTACATGGCACATAGAGTCAAATCCATTCTTGCCAACATGCGTATCCCGTCCACTAGATCACGAGCTTGTCGACCATGCCGCGTGAAA
>KR059285_North_Africa
TTCATATAGTTTACTGTATATCTACCCTACACATATGCAGTACTAATCCAGCATAAACGTAATGTATGTACATTACATTTTATGATCTACTTCATGTGTACGTACATAATATTAATGTAACAAGGACATAGTATGTATATAGTACATTAAACGATTTTCCACATGCATATTAAGCACGTACATCAGTATTAATGTAATAAGGACATAGTATGTATATTGTACATTAAACGATCTTCCTCATGCATATAAGCATGTATAATATTTCTATCGGCAGTACATAGTACATTTTACTGCATATTCGTACATGGCACATAGGGTCAAATCCATTCTTGCCAACATGCGTATCCCGTCCACTAGATCACGAGCTTGTTGACCATGCCGCGTGAAA
>KR059286_North_Africa
TTCATATAGTTTACTGTATATCTACCCTACACATATGCAGTACTAATCCAGCATAAACGTAATGTATGTACATTACATTTTATGATCTACTTCATGTGTACGTACATAATATTAATGTAACAAGGACATAGTATGTATATAGTACATTAAACGATTTTCCACATGCATATTAAGCACGTACATCAGTATTAATGTAATAAGGACATAGTATGTATATCGTACATTAAACGATCTTCCTCATGCATATAAGCATGTATAATGTTTCTATCGGCAGTACATAGTACATTTTACTGCATATTCGTACATGGCACATAGAGTCAAATCCATTCTTGTCAACATGCGTATCCCGTCCACTAGATCACGAGCTTGTTGACCATGCCGCGTGAAA
>KR059287_North_Africa
TTCATATAGTTTACTGTATATCTACCCTACACATATGCAGTACTAATCCAGCATGAACGCAATGTATGTACATTACATTTTATGATCTACTTCATGTGTACGTACATAATATTAATGTAATAAGGACATAGTATGTATATAGTACATTAAACGATTTTCCACATGCATATTAAGCACGTATATCAGTATTAATGTAATAAGGACATAGTATGTATATCGTACATTAAACGATCTTCCTCATGCATATAAGCATGTATAATGTTTCTACCGGCAGTACATAGTACATTTTACTGCATATTCGTACATGGCACATAGAGTCAAATCCATTCTTGCCAACATGCGTATCCCGTCCACTAGATCACGAGCTTGTCGACCATGCCGCGTGAAA
>KR059288_North_Africa
TTCATATAGTTTACTGTATATCTACCCTACACATATGCAGTACTAATCCAGCATAAACGTAATGTATGTACATTACATTTTATGATCTACTTCATGTGTACGTACATAATATTAATGTAACAAGGACATAGTATGTATATAGTACATTAAACGATTTTCCACATGCATATTAAGCACGTACATCAGTATTAATGTAATAAGGACATAGTATGTATATTGTACATTAAACGATCTTCCTCATGCATATAAGCATGTATAATATTTCTATCGGTAGTACATAGTACATTTTACTGCATATTCGTACATGGCACATAGGGTCAAATCCATTCCTGCCAACATGCGTATCCCGTCCACTAGATCACGAGCTTGTTGACCATGCCGCGTGAAA
>KR059303_North_Africa
TTCATATAGTTTACTGTATATCTACCCTACACATATGCAGTACTAATCCAGCATAAACGTAATGTATGTACATTACATTTTATGATCTACTTCATGTGTACGTACATAATATTAATGTAACAAGGACATAGTATGTATATAGTACATTAAACGATTTTCCACATGCATATTAAGCACGTATATCAGTATTAATGTAATAAGGACATAGTATGTATATCGTACATTAAACGATCTTCCTCATGCATATAAGCATGTATAATGTTTCTATCGGCAGTACATAGTACATTTTACTGCATATTCGTACATGGCACATAGAGTCAAATCCATTCTTGTCAACATGCGTATCCCGTCCACTAGATCACGAGCTTGTTGACCATGCCGCGTGAAA
>KR059304_North_Africa
TTCATATAGTTTACTGTATATCTACCCTACACATATGCAGTACTAATCCAGCATAAACGTAATGTATGTACATTACATTTTATGATCTACTTCATGCGTACGTACATAATATTAATGTAACAAGGACATAATATGTATATAGTACATTAAACGATTTTCCACATGCATATTAAGCACGTACATTAGTACTAATGTAATAAGGACATAGTATGTATATTGTACATTAAACGATCTTCCTCATGCATATAAGCATGTATAATGTTTCTATCGGCAGTACATAGTACATTTTACTGCATATTCGTACATGGCACATAGAGTCAAATCCATTCTTGCCAACATGCGTATCCCGTCCACTAGATCACGAGCTTGTTGACCATGCCGCGTGAAA
>KR059305_C_aegagrus__Middle_East_HGB
TTCATATAGTTTACTATATATCTACCCTACACATATGCAGTACTAATCCAGCATAAACGTAATATATGTACATTACATTTTATGATCTACTTCACGTGTACGTACATAATATTAATGTAATGAGGACATAATATGTATATAGTACATTAAACGATTTTCCACATGCATATTAAGCACGTATATCAGTATTAATGTAATAAAGACATAATATGTATATCGTACATTAAACGATTTCCCCCATGCATATAAGCATGTACAATGTCCCTATTAACAGTACATGGTACATTCTATTGTATATTCGTACATGGCACATAAAGTCAAATCTATTCTTGTCAACATGCGTATCCCGCCCACTAGATCACGAGCTTGTCGACCATGCCGCGTGAAA
>KR059306_Middle_East_HGF
TTCATATAGTTTATTATATATCTACCCTACATATATGCCGTACCAGTCCAGCATAAACATGACGTATATATATTACATTTTATGAACTATTTCACATGTGCGTACATAGTATTAATGTAATAAGGACATGATATGTATATAGTACATTAAATGACTTCCCGCATGCATATTAAGTACGTACATCAATACTAATGTAGCAAGGACATAATATGTATATCGTACATTAGACGATCTCCCCCATGCATATAAGCACGTACAGTATTTCTATTGACAGTACATAGTACATTTTGCTGCATGTTCGTACATAGCACATAAAGTCAAATCCGTCCTCGTCAACATGCGTATCCCGTCCACTAGATCACGAGCTTGTCGACCATGCCGCGTGAAA
>KR059307_Mediterranean_Europe
TTCATATAGTTTACTATATATCTACCCTACACATATGCAGTACTAACCCAGCATAAACGTAATGTATGTACATTACATTTTATGATCTACTTCATGTGCACGTACATAATATTAATGTAACAAGGACATAGTATGTATATAGTACATTAAACGATTTTCCACATGCATATTAAGCACGTATATCAGTATTAATGTAATAAGGACATAGTATGTATATTGTACATTAAACGATCTTCCTCATGCATATAAGCATGTACAATGCTTCTATCGACAGTACATAGTACATTTTATTGCATATTCGTACATGGCACATAGAGTCAAATCCATTCTCGCCAACATGCGTATCCCGTCCACTAGATCACGAGCTTGTTGACCATGCCGCGTGAAA
>KR059308_Mediterranean_Europe
TTCATATAGTTTACTATATATCTACCCTACACATATGCAGTACTAACCCAGCATAAACGTAATGTATGTACATTACATTTTATGATCTACTTCATGTGCACGTACATAATATTAATGTAACAAGGACATAGTATGTATATAGTACATTAAACGATTTTCCACATGCATATTAAGCACGTATATCAGTATTAATGTAATAAGGACATAGTATGTATATTGTACATTAAACGATCTTCCTCATGCATATAAGCATGTACAATGCTTCTATCGACAGTACATAGTACATTTTATTGCATATTCGTACATGGCACATAGAGTCAAATCCATTCTCGCCAACATGCGTATCCCGTCCACTAGATCACGAGCTTGTTGACCATGCCGCGTGAAA
>KR059309_Mediterranean_Europe
TTCATATAGTTTACTGTATATCTACCCTACACATATGCAGTACTAATCCAGCATAAACGTAATGTATGTACATTACATTTTATGATCTACTTCATGTGCACGTACATAATATTAATGTAACAAGGACATAGTATGTATATAGTACATTAAACGATTTTCCGCATGCATATTAAGCACGTACATCAGTATTAATGTAATAAGGACATAATATGTATATCGTACATTAAACGATCTTCCTCATGCATATAAGCATGTATAATGCCTTTATTGGCAGTACATAGTACATTTTACTGCATATTCGTACATGGCACATAGAGTCAAATCCATTCTTGCCAACATGCGTATCCCGTCCACTAGATCACGAGCTTGTTGACCATGCCGCGTGAAA
>KR059310_Mediterranean_Europe
TTCATATAGTTTACTGTATATCTACCCTACACATATGCAGTACTAATCCAGCATAAACGTAATGTATGTACATTACATTTTATGATCTACTTCATGTGCACGTACATAATATTAATGTAACAAGGACATAGTATGTATATAGTACATTAAACGATTTTCCACATGCATATTAAGCACGTACATCAGTATTAATGTAACAAGGACATAGTATGTATATTGTACATTAAACGATCTTCCCCATGCATATAAGCATGTATAATGCCTCTATTGGCAGTACATAGTACATTTTACTGCATATTCGTACATGGCACATAGAGTCAAATCCATTCTTGTCAACATGCGTATCCCGTCCACTAGATCACGAGCTTGTTGACCATGCCGCGTGAAA
>KR059311_Mediterranean_Europe
TTCATATAGTTTACTGTATATCTACCCTACACATATGCAGTACTAATCCAGCATAAACGTAATGTATGTACATTACATTTTATGATCTACTTCATGTGCACGTACATAATATTAATGTAACAAGGACATAGTATGTATATAGTACATTAAACGATTTTCCACATGCATATTAAGCACGTACATCAGTATTAATGTAATAAGGACATAATATGTATATTGTACATTAAACGATCTTCCTCATGCATATAAGCATGTACAATGCCTCTATTGGCAGTACATAGTACATTTTACTGCATATTCGTACATGGCACATAGAGTCAAATCCATTCTTGCCAACATGCGTATCCCGTCCACTAGATCACGAGCTTGTTGACCATGCCGCGTGAAA
>KR059325_Mediterranean_Europe
TTCATATAGTTTACTGTATATCTACCCTACACATATGCAGTACTAATCCAGCATAAACGTAATGTATGTACATTACATTTTATGATCTACTTCATGTGCACGTACATAATATTAATGTAACAAGGACATGGTATGTATATAGTACATTAAACGATTTTCCACATGCATATTAAGCACGTACATCAGTATTAATGTAATAAGGACATAGTATGTATATTGTACATTAAACGATCTTCCTCATGCATATAAGCATGTACAATGCCTCTATCGGCAGTACATAGTACATTTTACTGCATGTTCGTACATGGCACATAGAGTCAAATCCATTCTCGCCAACATGCGTATCCCGTCCACTAGATCACGAGCTTGTTGACCATGCCGCGTGAAA
>KR059339_Mediterranean_Europe
TTCATATAGTTTACTGTATATCTACCCTACACATATGCAGTACTAATCCAGCATAAACGTAATGTATGTACATTACATTTTATGATCTACTTCATGTGCACGTACATAATATTAATGTAACAAGGACATGGTATGTATATAGTACATTAAACGATTTTCCACATGCATATTAAGCACGTACATCAGTATTAATGTAATAAGGACATAGTATGTATATCGTACATTAAACGATCTTCCTCATGCATATAAGCATGTATAATACTTCTATTGGCAGTACATAGTACATTTTACTGCATATTCGTGCATGGCACATAGAGTCAAATCCATTCTTGCCAACATGCGTATCCCGTCCACTAGATCACGAGCTTGTTGACCATGCCGCGTGAAA
>KR059340_Mediterranean_Europe
TTCATATAGTTTACTGTATATCTACCCTACACATATGCAGTACTAATCCAGCATAAACGTAATGTATGTACATTACATTTTATGATCTACTTCATGTGCACGTACATAATATTAATGTAACAAGGACATGGTATGTATATAGTACATTAAACGATTTTCCACATGCATATTAAGCACGTACATCAGTATTAATGTAATAAGGACATAGTATGTATATCGTACATTAAACGATCTTCCTCATGCATATAAGCATGTATAATACTTCTATTGGCAGTACATAGTACATTTTACTGCATATTCGTGCATGGCACATAGAGTCAAATCCATTCTTGCCAACATGCGTATCCCGTCCACTAGATCACGAGCTTGTTGACCATGCCGCGTGAAA
>KR059341_Mediterranean_Europe
TTCATATAGTTTACTGTATATCTACCCTACACATATGCAGTACTAATCCAGCATAAACGTAATGTATGTACATTACATTTTATGATCTACTTCATGTGCACGTACATAATATTAATGTAACAAGGACATGGTATGTATATAGTACATTAAACGATTTTCCACATGCATATTAAGCACGTACATCAGTATTAATGTAATAAGGACATAATATGTATATTGTACATTAAACGATCTTCCTCATGCATATAAGCATGTATAATACTTCTATCGGCAGTACATAGTACATTTTACTGCATATTCGTACATGGCACATAGAGTCAAATCCATTCTTGTCAACATGCGTATCCCGTCCACTAGATCACGAGCTTGTTGACCATGCCGCGTGAAA
>KR059342_Middle_Europe
TTCATATAGTTTACTGTATATCTACCCTACACATACGCAGTACTAATCCAGCATAAACGTAATGTATGTACATTACATTTTATGATCTACTTCATGTGTACGTACATAGTATTAATGTAACAAGGACATAGTATGTATATAGTACATTAAACGATTTTCCACATGCATATTAAGCACGTACATCAGTATTAATGTAATAAGGACATAACATGTATATTGTACATTAAACGATCTTCCTCATGCATATAAGCATGTATAACGCTTCTATCGGCAGTACATAGTACATTTTACTGCATATTCGTACATGGCACATAGAGTCAAATCCATTCTTGCCAACATGCGTATCCCGTCCACTAGATCACGAGCTTGTTGACCATGCCGCGTGAAA
>KR059343_Middle_Europe
TTCATATAGTTTACTGTATATCTACCCTACACATACGCAGTACTAATCCAGCATAAACGTAATGTATGTACATTACATTTTATGATCTACTTCATGTGTACGTACATAGTATTAATGTAACAAGGACATAGTATGTATATAGTACATTAAACGATTTTCCACATGCATATTAAGCACGTACATCAGTATTAATGTAATAAGGACATAACATGTATATTGTACATTAAACGATCTTCCTCATGCATATAAGCATGTATAACGCTTCTATCGGCAGTACATAGTACATTTTACTGCATATTCGTACATGGCACATAGAGTCAAATCCATTCTTGCCAACATGCGTATCCCGTCCACTAGATCACGAGCTTGTTGACCATGCCGCGTGAAA
>KR059344_Middle_Europe
TTCATATAGTTTACTGTATATCTACCCTACACATATGCAGTACTAATCCAGCATAAACGTAATGTATGTACATTACATTTTATGATCTACTTCATGTGTACGTACATAATATTAATGTAACAAGGACATAGTATGTATATAGTACATTAAACGATTTTCCACATGCATATTAAGCACGTACATCAGTATTAATGTAATAAGGACATAACATGTATATTGTACATTAAACGATCTTCCTCATGCATATAAGCATGTATAACGCTTCTATTGGCAGTACATAGTACATTTTACTGCATATTCGTACATGGCACATAGAGTCAAATCCATTCTTGCCAACATGCGTATCCCGTCCACTAGATCACGAGCTTGTTGACCATGCCGCGTGAAA
>KR059345_Middle_Europe
TTCATATAGTTTACTGTATATCTACCCTACACATACGCAGTACTAATCCAGCATAAACGTAATGTATGTACATTACATTTTATGATCTACTTCATGTGTACGTACATAGTATTAATGTAACAAGGACATAGTATGTATATAGTACATTAAACGATTTTCCACATGCATATTAAGCACGTACATCAGTATTAATGTAATAAGGACATAACATGTATATTGTACATTAAACGATCTTCCTCATGCATATAAGCATGTATAACGCTTCTATCGGCAGTACATAGTACATTTTACTGCATATTCGTACATGGCACATAGAGTCAAATCCATTCTTGCCAACATGCGTATCCCGTCCACTAGATCACGAGCTTGTTGACCATGCCGCGTGAAA
>KR059346_Middle_Europe
TTCATATAGTTTACTGTATATCTACCCTACACATATGCAGTACTAATCCAGCATAAACGTAATGTATGTACATTACATTTTATGATCTACTTCATGTGCACGTACATAATATTAATGTAACAAGGACATAGTATGTATATAGTACATTAAACGATTTTCCACATGCATATTAAGCACGTACATCAGTATTAATGTAATAAGGACATAGTATGTATATTGTACATTAAACGATCTTCCCCATGCATATAAGCATGTATAATGCTTCCATCGACAGTACATAGTACATTTTACTGCATATTCGTACATAGCACATAGAGTCAAATCCATTCTTGCCAACATGCGTATCCCGTCCACTAGATCACGAGCTTGTTGACCATGCCGCGTGAAA
>KR059347_Middle_Europe
TTCATATAGTTTACTGTATATCTACCCTACACATACGCAGTACTAATCCAGCATAAACGTAATGTATGTACATTACATTTTATGATCTACTTCATGTGTACGTACATAGTATTAATGTAACAAGGACATAGTATGTATATAGTACATTAAACGATTTTCCACATGCATATTAAGCACGTACATCAGTATTAATGTAATAAGGACATAACATGTATATTGTACATTAAACGATCTTCCTCATGCATATAAGCATGTATAACGCTTCTATCGGCAGTACATAGTACATTTTACTGCATATTCGTACATGGCACATAGAGTCAAATCCATTCTTGCCAACATGCGTATCCCGTCCACTAGATCACGAGCTTGTTGACCATGCCGCGTGAAA
>KR059348_Middle_Europe
TTCATATAGTTTACTGTATATCTACCCTACACATATGCAGTACTAATCCAGCATAAACGTAATGTATGTACATTACATTTTATGATCTACTTCATGTGCACGTACATAATATTAATGTAACAAGGACATAGTATGTATATAGTACATTAAACGATTTTCCACATGCATATTAAGCACGTACATCAGTATTAATGTAATAAGGACATAATATGTATATTGTACATTAAACGATCTTCCTCATGCATATAAGCATGTACAACGCCTCTATTGGCAGTACATAGTACATTTTACTGCATATTCGTACATGGCACATAGAGTCAAATCCATTCTTGTCAACATGCGTATCCCGTCCACTAGATCACGAGCTTGTTGACCATGCCGCGTGAAA
>KR059361_Middle_Europe
TTCATATAGTTTACTGTATATCTACCCTACACATATGCAGTACTAATCCAGCATAAACGTAATGTATGTACATTACATTTTATGATCTACTTCATGTGCACGTACATAATATTAATGTAACAAGGACATGGTATGTATATAGTACATTAAACGATTTTCCACATGCATATTAAGCACGTACATCAGTATTAATGTAATAAGGACATAGTATGTATATCGTACATTAAACGATCTTCCTCATGCATATAAGCATGTATAATGCTTCTATCGGCAGTACATAGTACATTTTACTGCATATTCGTACATGGTACATGGAGTCAAATCCATTCTTGTCAACATGCGTATCCCGTCCACTAGATCACGAGCTTGTTGACCATGCCGCGTGAAA
>KR059375_Middle_Europe
TTCATATAGTTTACTGTATATCTACCCTACACATACGCAGTACTAATCCAGCATAAACGTAATGTATGTACATTACATTTTATGATCTACTTCATGTGTACGTACATAATATTAATGTAACAAGGACATAGTATGTATATAGTACATTAAACGATTTTCCACATGCATATTAAGCACGTACATCAGTATTAATGTAATAAGGACATAATATGTATATTGTACATTAAACGATCTTCCCCATGCATATAAGCATGTATAACACTTCTATCGGCAGTACATAGTACATTTTACTGCATATTCGTACATGGCACATAGAGTCAAATCCATTCTTGCCAACATGCGTATCCCGTCCACTAGATCACGAGCTTGTTGACCATGCCGCGTGAAA
>KR059376_Middle_Europe
TTCATATAGTTTACTGTATATCTACCCTACACATATGCAGTACTAATCCAGCATAAACGTAATGTATGTACATTACATTTTATGATCTACTTCATGTGCACGTACATAACATTAATGTAACAAGGACATAGTATGTATATAGTACATTAAACGATTTTCCACATGCATATTAAGCACGTACATCAGTATTAATGTAATAAGGACATAGTATGTATATTGTACATTAAACGATCTTCCCCATGCATATAAGCATGTACAATACTTCTATTGGCAGTACATAGTACATTTTACTGCATATTCGTACATGGCACATAGAGTCAAATCCATTCTTGCCAACATGCGTATCCCGTCCACTAGATCACGAGCTTGTTGACCATGCCGCGTGAAA
>KR059377_Middle_Europe
TTCATATAGTTTACTGTATATCTACCCTACACATATGCAGTACTAATCCAGCATAAACGTAATGTATGTACATTACATTTTATGATCTACTTCATGTGCACGTACATAATATTAATGTAACAAGGACATAGTATGTATATAGTACATTAAACGATTTTCCACATGCATATTAAGCACGTACATCAGTATTAATGTAATAAGGACATAGTATGTATATTGTACATTAAACGATCTTCCCCATGCATATAAGCATGTATAATGCTTCTATCGACAGTACATAGTACATTTTACTGCATATTCGTACATAGCACATAGAGTCAAATCCATTCTTGCCAACATGCGTATCCCGTCCACTAGATCACGAGCTTGTTGACCATGCCGCGTGAAA
>KR059388_Middle_Europe
TTCATATAGTTTACTGTATATCTACCCTACACATATGCAGTACTAATCCAGCATAAACGTAATGTATGTACATTACATTTTATGATCTACTTCATGTGTACGTACATAATATTAATGTAACAAGGACATAGTATGTATATAGTACATTAAACGATTTTCCACATGCATATTAAGCACGTACATCAGTATTAATGTAATAAGGACATAACATGTATATTGTACATTAAACGATCTTCCTCATGCATATAAGCATGTATAACGCTTCTATCGGCAGTACATAGTACATTTTACTGCATATTCGTACATGGCACATAGAGTCAAATCTATTCTTGTCAACATGCGTATCCCGTCCACTAGATCACGAGCTTGTTGACCATGCCGCGTGAAA
>KR059389_Middle_Europe_HGC
TTCATATAGTTTACTATATATCTACCCTACATATATGCAGTACTAATCCAACATAAACATAATGTATGTACATTACATTTTATGGTCTACTTCACGTGTACGTACATAACATTAATGTAACAAGGACATAATATGTATATAGTACATTAGATGGTTTCCCACATGCATATTAAGCACGTACATCAGTATTAATGTAATAAGGACATAATATGTATATTGTACATTAAACGATCTTCCCCATGCATATAAGCATGTACAATATCCCTATCGATAGTACATAGCACATTCTATTGTATACCCGTACATAGCGCATGAAGTCAAATCCGTCCTCGTCAACATGCATATCCCGCCCACTAGATCACGAGCTTGTTCACCATGCCGCGTGAAA
>KR059390_Middle_Europe
TTCATATAGTTTACTGTATATCTACCCTACACATATGCAGTACTAATCCAGCATAAACGTAATGTATGTACATTACATTTTATGATCTACTTCATGTGCACGTACATAATATTAATGTAACAAGGACATAGTATGTATATAGTACATTAAACGATTTTCCACATGCATATTAAGCACGTACATCAGTATTAATGTAATAAGGACATAGTATGTATATTGTACATTAAACGATCTTCCCCATGCATATAAGCATGTACAATGCTTCTATCGGCAGTACATAGTACATTTTACTGCATATTCGTACATGGCACATGGAGTCAAATCCATTCTCGCCAACATGCGTATCCCGTCCACTAGATCACGAGCTTGTTGACCATGCCGCGTGAAC
>KR059405_Middle_Europe
TTCATATAGTTTACTGTATATCTACCCTACACATATGCAGTACTAATCCAGCATAAACGTAATGTATGTACATTACATTTTATGATCTACTTCATGTGCACGTACATAATATTAATGTAACAAGGACATAGTATGTATATAGTACATTAAACGATTTTCCACATGCATATTAAGCACGTACATCAGTATTAATGTAATAAGGACATAGTATGTATATCGTACATTAAACGATCTTCCTCATGCATATAAGCATGTATAATGCCTCTATTGGCAGTACATAGTACATCTTACTGCATATTCGTACATGGCACATAGAGTCAAATCCATTCTTGCCAGCATGCGTATCCCGTCCACTAGATCACGAGCTTGTTGACCATGCCGCGTGAAA
>KR059422_Middle_Europe
TTCATATAGTTTACTGTATATCTACCCTACACATATGCAGTACTAACCCAGCATAAACGTAATGTATGTACATTACATTTTATGATCTACTTCATGTGCACGTACATAATATTAATGTAACAAGGACATAGTATGTATATAGTACATTAAACGATTTTCCACATGCATATTAAGCACGTACATTAGTATTAATGTAATAAGGACATAATATGTATATTGTACATTAAACGATCTTCCTCATGCATATAAGCATGTATAATACCTCCATTAGCAGTACATAGTACATTTTACTGCATATTCGTACATGGCACATAGAGTCAAATCCATTCTTGCCAACATGCGTATCCCGTCCACTAGATCACGAGCTTGTTGACCATGCCGCGTGAAA
>KR059423_Middle_Europe
TTCATATAGTTTACTGTATATCTACCCTACACATATGCAGTACTAATCCAGCATAAACGTAATGTATGTACATTACATTTTATGATCTACTTCATGTGTACGTACATAATATTAATGTAACAAGGACATAGTATGTATATAGTACATTAAACGATTTTCCACATGCATATTAAGCACGTACATCAGTATTAATGTAATAAGGACATAACATGTATATTGTACATTAAACGATCTTCCTCATGCATATAAGCATGTATAACGCTTCTATTGACAGTACATAGTACATTTTACTGCATATTCGTACATGGCACATAGAGTCAAATCTATTCTTGCCAACATGCGTATCCCGTCCACTAGATCACGAGCTTGTTGACCATGCCGCGTGAAA
>KR059424_Mediterranean_Europe
TTCATATAGTTTACTGTATATCTACCCTACACATATGCAGTACTAATCCAGCATAAACGTAATGTATGTACATTACATTTTATGGTCTACTTCATGTGCACGTACATAATATTAATGTAACAAGGACATAGTATGTATATAGTACATTAAACGATTTTCCACATGCATATTAAGCACGTACATCAGTATTAATGTAATAAGGACATAATATGTATATTGTACATTAAACGATCTTCCCCATGCATATAAGCATGTATAATGCCTCTATTGACAGTACATAGTACATTTTACTGCATATTCGTACATGGCACATAGAGTCAAATCCATTCTTGCCAACATGCGTATCCCGTCCACTAGATCACGAGCTTGTTGACCATGCCGCGTGAAA
>KR059425_Mediterranean_Europe_GHC
TTCATATAGTTTACTATATATCTACCCTACATATATGCAGTACTAATCCAACATAAACATAATGTATGTACATTACATTTTATGGTCTACTTCACGTGTACGTACATAACATTAATGTAACAAGGACATAATATGTATATAGTACATTAGATGGTTTTCCACATGCATATTAAGCACGTACATCAGTATTAATGTAGTAAGGACATAATATGTATATTGTACATTAAACGATCTTCCCCATGCATATAAGCATGTACAATATCCCTATCGATAGTACATGGCACATTCTATTGTATACCCGTACATAGCGCATGAAGTCAAATCCGTCCTCGTCAACATGCATATCCCGTCCACTAGATCACGAGCTTGTTCACCATGCCGCGTGAAA
>KR059426_Mediterranean_Europe
TTCATATAGTTTACTGTATATCTACCCTACACATATGCAGTACTAATCCAGCATAAACGTAATGTATGTACATTACATTTTATGATCTACTTCATGTGCACGTACATAATATTAATGTAACAAGGACATAGTATGTATATAGTACATTAAACGATTTTCCACATGCATATTAAGCACGTACATCAGTATTAATGTAATAAGGACATAATATGTATATCGTACATTAAACGATCTTCCTCATGCATATAAGCATGTATAATGCCTCTATTGGCAGTACATAGTACATTTTACTGCATATTCGTACATGGCACATAGAGTCAAATCCATTCTTGCCAACATGCGTATCCCGTCCACTAGATCACGAGCTTGTCGACCATGCCGCGTGAAA
>KR059440_Mediterranean_Europe
TTCATATAGTTTACTGTATATCTACCCTACACATATGCAGTACTAATCCAGCATAAACGTAATGTATGTACATTACATTTTATGATCTACTTCATGTGCACGTACATAACATTAATGTAACAAGGACATAGTATGTATATAGTACATTAAACGATTTTCCACATGCATATTAAGTACGTACATCAGTATTAATGTAATAAGGACATAATATGTATATTGTACATTAAACGATCTTCCTCATGCATATAAGCATGTACAATGCTTCTATCGGCAGTACATAGTACATTTTACTGCATATTCGTACATGGCACATGGAGTCAAATCCATTCTCGCCAACATGCGTATCCCGTCCACTAGATCACGAGCTTGTTGACCATGCCGCGTGAAA
>KR059441_Mediterranean_Europe
TTCATATAGTTTACTGTATATCTACCCTACACATATGCAGTACTAATCCAGCATAAACGTAATGTATGTACATTACATTTTATGATCTACTTCATGTGCACGTACATAATATTAATGTAACAAGGACATAGTATGTATATAGTACATTAAACGATTTTCCACATGCATATTAAGCACGTACATCAGTATTAATGTAATAAGGACATAATATGTATATTGTACATTAAACGATCTTCCTCATGCATATAAGCATGTATAATGTTTCCATTGGCAGTACATAGTACATTTTACTGCATACTCGTACATAGCACATAGAGTCAAATCCATTCTTGCCAACATGCGTATCCCGTCCACTAGATCACGAGCTTGTTGACCATGCCGCGTGAAA
>KR059442_Mediterranean_Europe
TTCATATAGTTTACTGTATATCTACCCTACACATATGCAGTACTAATCCAGCATAAACGTAATGTATGTACATTACATTTTATGATCTACTTCATGTGTACGTACATAATATTAATGTAACAAGGACATAGTATGTATATAGTACATTAAACGATTTTCCACATGCATATTAAGCACGTACATCAGTATTAATGTAATAGGGACATAACATGTATATTGTACATTAAACGATCTTCCTCATGCATATAAGCATGTATAACGCTTCTATCGGCAGTACATAGTACATTCTACTGCATATTCGTACATGGCACATAGAGTCAAATCCATTCTTGTCAACATGCGTATCCCGTCCACTAGATCACGAGCTTGTTGACCATGCCGCGTGAAA
>KR059443_Mediterranean_Europe
TTCATATAGTTTACTGTATATCTACCCTACACATATGCAGTACTAATCCAGCATAAACGTAATGTATGTACATTACATTTTATGATCTACTTCATGTGCACGTACATAATATTAATGTAACAAGGACATAGTATGTATATAGTACATTAAACGATTTTCCACATGCATATTAAGTACGTACATCAGTATTAATGTAATAAGGACATAATATGTATATTGTACATTAAACGATCTTCCTCATGCATATAAGCATGTACAATGCTTCTATCGGCAGTACATAGTACATTTTACTGCATATTCGTACATGGCACATGGAGTCAAATCCATTCTCGCCAACATGCGTATCCCGTCCACTAGATCACGAGCTTGTTGACCATGCCGCGTGAAA
>KR059444_Mediterranean_Europe
TTCATATAGTTTACTGTATATCTACCCTACACATATGCAGTACTAATCCAGCATAAACGTAATGTATGTACATTACATTTTATGATCTACTTCATGTGCACGTACATAATATTAATGTAACAAGGACATAGTATGTATATAGTACATTAAACGATTTTCCACATGCATATTAAGCACGTACATCAGTATTAATGTAATAAGGACATAGTATGTATATTGTACATTAAACGATCTTCCTCATGCATATAAGCATGTACAATGCTTCTATCGACAGTACATAGTACATTTTACTGCATATTCGTACATGGCACATGGAGTCAAATCCATTCTCGCCAACATGCGTATCCCGTCCACTAGATCACGAGCTTGTTGACCATGCCGCGTGAAA
>KR059445_Mediterranean_Europe
TTCATATAGTTTACTGTATATCTACCCTACACATATGCAGTACTAATCCAGCATAAACGTAATGTATGTACATTACATTTTATGATCTACTTCATGTGCACGTACATAATATTAATGTAACAAGGACATAGTATGTATATAGTACATTAAACGATTTTCCACATGCATATTAAGCACGTACATCAGTATTAATGTAATAAAGACATAGTATGTATATTGTACATTAAACGATCTTCCCCATGCATATAAGCATGTACAATGCCTCTATTGGCAGTACATAGTACATTTTACTGCATATTCGTACATAGCACATAGAGTCAAATCCATTCTTGCCAACATGCGTATCCCGTCCACTAGATCACGAGCTTGTTGACCATGCCGCGTGAAA
>KR059446_Mediterranean_Europe
TTCATATAGTTTACTGTATATCTACCCTACACATATGCAGTACTAATCCAGCATAAACGTAATGTATGTACATTACATTTTATGATCTACTTCATGTGCACGTACATAATATTAATGTAACAAGGACATAACATGTATATAGTACATTAAACGATTTTCCACATGCATATTAAGCACGTACATCAGTATTAATGTAATAAGGACATAATATGTATATCGTACATTAAACGATCTTCCTCATGCATATAAGCATGTATAATGCCTCTATTGGCAGTACATAGTACATTTTACTGCATATTCGTACATGGCACATAGAGTCAAATCCATTCTTGCCAACATGCGTATCCCGTCCACTAGATCACGAGCTTGTTGACCATGCCGCGTGAAA
>KR059507_Middle_East
TTCATATAGTTTACTGTATATCTACCCTACACATATGCAGTACTAATCCAGCATAAACGTAATGTATGTACATTACATTTTATGATCTACTTCATGTGTACGTACATAATATTAATGTAACAAGGACATAGTATGTATATAGTACATTAAACGATTTTCCACATGCATATTAAGCACGTACATCAGTATTAATGTAATAAGGACATAGTATGTATATTGTACATTAAACGATCTTCCTCATGCATATAAGCATGTATAATGTTTCTATCGACAGTACATAGTACATTTTACTGCATATTCGTACATGGCACATAGAGTCAAATCCATTCTTGCCAACATGCGTATCCCGTCCACTAGATCACGAGCTTGTTGACCATGCCGCGTGAAA
>KR059508_Middle_East
TTCATATAGTTTACTGTATATCTACCCTACACATATGCAGTACTAATCCAGCATAAACGTAATGTATGTACATTACATTTTATGATCTACTTCATGTGTACGTACATAATATTAATGTAACAAGGACATAGTATGTATATAGTACATTAAACGATTTTCCACATGCATATTAAGCACGTACATCAGTATTAATGTAATAAGGACATAGTATGTATATTGTACATTAAACGATCTTCCTCATGCATATAAGCATGTATAATGTTTCTATCGGCAGTACATAGTACATTTTACTGCATATTCGTACATAGCACATAGAGTCAAATCCATTCTTGTCAACATGCGTATCCCGTCCACTAGATCACGAGCTTGTTGACCATGCCGCGTGAAA
>KR059509_Middle_East
TTCATATAGTTTACTGTATATCTACCCTACACATATGCAGTACTAATCCAGCATAAACGTAATGTATGTACATTACATTTTATGATCTACTTCATGTGTACGTACATAATATTAATGTAACAAGGACATAGTATGTATATAGTACATTAAACGATTTTCCACATGCATATTAAGCACGTACATCAGTATTAATGTAATAAGGACATAGTATGTATATTGTACATTAAACGATCTTCCTCATGCATATAAGCATGTATAATGTTTCTATCGGCAGTACATAGTACATTTTACTGCATATTCGTACATAGCACATAGAGTCAAATCCATTCTTGTCAACATGCGTATCCCGTCCACTAGATCACGAGCTTGTTGACCATGCCGCGTGAAA
>KR059510_Middle_East
TTCATATAGTTTACTGTATATCTACCCTACACATATGCAGTACTAATCCAGCATAAACGTAATGTATGTACATTACATTTTATGATCTACTTCATGTGTACGTACATAATATTAATGTAACAAGGACATAGTATGTATATAGTACATTAAACGATTTTCCACATGCATATCAAGCACGTACATCAATATTAATGTAATAAGGACATAGTATGTATATTGTACATTAAACGATCTTCCTCATGCATATAAGCATGTATAATGTTTCTATCGGCAGTACATGGTACATTTTACTGCATATTCGTACATGGCACATAGAGTCAAATCCATTCTTGCCAACATGCGTATCCCGTCCACTAGATCACGAGCTTGTTGACCATGCCGCGTGAAA
>KR059520_Middle_East
TTCATATAGTTTACTGTATATCTACCCTACACATATGCAGTACTAATCCAGCATAAACGTAATGCATGTACATTACATTTTATGATCTACTTCATGTGTACGTACATAATATTAATGTAACAAGGACATACTATGTATATAGTACATTAAACGATTTTCCACATGCATATTAAGTACGTACATCAGTATTAATGTAATAAGGACATAGTATGTATATTGTACATTAAACGATCTTCCCCATGCATATAAGCATGTATAATGTCTCTATCGGCAGTACATAGTACATTTTACTGCATATTCGTACATGGCACATAGAGTCAAATCCATTCTTGTCAACATGCGTATCCCGTCCACTAGATCACGAGCTTGTTGACCATGCCGCGTGAAA
>KR059521_Middle_East
CTCATATAGTTTACTGTATATCTACCCTACACATATGCAGTACTAATCCAGCATAAACGTAATGTATGTACATTACATTTTATGATCTACTTCATGTGTACGTACATAATATTAATGTAACAAGGACATAGTATGTATATAGTACATTAAACGATTTCCCACATGCATATTAAGCACGTACATTAGTATTAATGTAATAAGGACATAATATGTATATTGTACATTAAACGATCTTCCTCATGCATATAAGCATGTATAATGCTTCTATTGGCAGTACATAGTACATTTTACTGCATATTCGTACATGGCACATAGAGTCAAATCCATTCTTGCCAACATGCGTATCCCGTCCATTAGATCACGAGCTTGTTGACCATGCCGCGTGAAA
>KR059522_Middle_East
TTCATATAGTTTACTGTATATCTACCCTACACATATGCAGTACTAATCCAGCATAAACGTAATGTATGTACATTACATTTTATGATCTACTTCATGTGTACGTACATAATATTAATGTAATAAGGACATAATATGTATATAGTACATTAAACGATTTTCCACATGCATATTAAGCACGTACATCAGTATTAATGTAATAAGGACATAGTATGTATATCGTACATTAAACGATCTTCCCCATGCATATAAGCATGTATAATGCTTCTATCGACAGTACATAGTACATTTCACTGCATATTCGTACATGGCACATAGAGTCAAATCCATTCTTGCCAACATGCGTATCCCGTCCACTAGATCACGAGCTTATTGACCATGCCGCGTGAAA
>KR059523_Middle_East
TTCATATAGTTTACTGTATATCTACCCTACACATATGCAGTACTAATCCAGCATAAACGTAATGTATGTACATTACATTTTATGATCTACTTCATGTGTACGTACATAATATTAATGTAATAAGGACATAATATGTATATAGTACATTAAACGATTTTCCACATGCATATTAAGCACGTACATCAGTATTAATGTAATAAGGACATAGTATGTATATCGTACATTAAACGATCTTCCCCATGCATATAAGCATGTATAATGCTTCTATCGACAGTACATAGTACATTTCACTGCATATTCGTACATGGCACATAGAGTCAAATCCATTCTTGCCAACATGCGTATCCCGTCCACTAGATCACGAGCTTATTGACCATGCCGCGTGAAA
>KR059556_Middle_East
TTCATATAGTTTACTGTATATCTACCCTACACATATGCAGTACTAATCCAGCATAAACGTAATGTATGTACATTACATTTTATGATCTACTTCATGTGCGCGTACATAATATTAATGTAACAAGGACATAGTATGTATATAGTACATTAAACGATTTTCCACATGCATATTAAGCACGTACATCAGTATTAATGTAATAAGGACATAATATGTATATTGTACATTAAACGATCTTCCCCATGCATATAAGCATGTATAATGCTTCTATCGACAGTACATAGTACATTTTATTGCATATTCGTACATGGCACATAGAGTCAAATCCATTCTTGCCAACATGCGTATCCCGTCCACTAGATCACGAGCTTGTTGACCATGCCGCGTGAAA
>KR059558_Middle_East
TTCATATAGTTTACTGTATATCTACCCTACACATATGCAGTACTAATCCAGCATAAACGCAATGTATGTACATTACATTTTATGATCTACTTCATGTGTACGTACATAATATTAATGTAACAAGGACATAGTATGTATATAGTACATTAAACGATTTTCCACATGCATATTAAGCGCGTACATCAGTATTAATGTAATAAGGACATAGTATGTATATTGTACATTAAACGATCTTCCCCATGCATATAAGCATGTATAATGCTTCTATTGGCAGTACATAGTACATTTTACTGCATATTCGTACATGGCACATAGAGTCAAATCCATTCTTGCCAACATGCGTATCCTGTCCACTAGATCACGAGCTTGTTGACCATGCCGCGTGAAA
>KR059559_Middle_East
TTCATATAGTTTACTGTATATCTACCCTACACATATGCAGTACTAATCCAGCATAAACGTAATGTATGTACATTACATTTTATGATCTACTTCATGTGTACGTACATAATATTAATGTAACAAGGACATAGTATGTATATAGTACATTAAACGATTTTCCACATGCATATTAAGCACGTACATCAGTATTAATGTAATGAGGACATAGTATGTATATTGTACATTAAACGATCTTCCTCATGCATATAAGCATGTATAATGTTTCTATCGGCAGTACATAGTACATTTTACTGCATATTCGTACATGGCACATAGAGTCAAATCCATTCTTGCCAACATGCGTATCCCGTCCACTAGATCACGAGCTTGTTGACCATGCCGCGTGAAA
>KR059561_Mediterranean_Europe
TTCATATAGTTTACTGTATATCTACCCTACACATATGCAGTACTAATCCAGCATAAACGTAATGTATGTACATTACATTTTATGATCTACTTCATGTGCACGTACATAATATTAATGTAACAAGGACATAATATGTATATAGTACATTAAACGATTTTCCACATGCATATTAAGCACGTACATCAGTATTAATGTAACAAGGACATAATATGTATATTGTACATTAAACGATCTTCCTCATGCATATAAGCACGTATAATGCTTCTATTGGCAGTACATAGTACATTTTACTGCATATTCGTACATGGCACATAGAGTCAAATCCATTCTTGCCAACATGCGTATCCCGTCCACTAGATCACGAGCTTGTTGACCATGCCGCGTGAAA
>KR059562_Mediterranean_Europe
TTCATATAGTTTACTGTATATCTACCCTACACATATGCAGTACTAATCCAGCATAAACGTAATGTATGTACATTACATTTTATGATCTACTTCATGTGCACGTACATAATATTAATGTAACAAGGACATAGTATGTATATAGTACATTAAACGATTTTCCACATGCATATTAAGCACGTACATCAGTATTAATGTAATAAGGACATAATATGTATATTGTACATTAAACGATCTTCCTCATGCATATAAGCATGTATAATGCCTCCATTGGCAGTACATAGTACATTTTACTGCATATCCGTACATGGCACATAGAGTCAAATCCATTCTTGCCAACATGCGTATCCCGTCCACTAGATCACGAGCTTGTTGACCATGCCGCGTGAAA
>KR059563_Mediterranean_Europe
TTCATATAGTTTACTGTATATCTACCCTACACATATGCAGTACTAATCCAGCATAAACGTAATGTATGTACATTACATTTTATGATCTACTTCATGTGCACGTACATAATATTAATGTAACAAGGACATAGTATGTATATAGTACATTAAACGATTTTCCACATGCATATTAAGCACGTACATCAGTATTAATGTAATAAGGACATAATATGTATATTGTACATTAAACGATCTTCCTCATGCATATAAGCATGTATAATGCCTCCATTGGCAGTACATAGTACATTTTACTGCATATCCGTACATGGCACATAGAGTCAAATCCATTCTTGCCAACATGCGTATCCCGTCCACTAGATCACGAGCTTGTTGACCATGCCGCGTGAAA
>KR059564_Mediterranean_Europe
TTCATATAGTTTACTGTATATCTACCCTACACATATGCAGTACTAATCCAGCATAAACGTAATGTATGTACATTACATTTTATGATCTACTTCATGTGCACGTACATAATATTAATGTAACAAGGACATAATATGTATATAGTACATTAAACGATTTTCCACATGCATATTAAGCACGTACATCAGTATTAATGTAATAAAGACATAATATGTATATTGTACATTAAACGATCTTCCTCATGCATATAAGCATGTATAATGTTTCTATTGGCAGTACATAGTACATTTTACTGCATATTCGTACATGGCACATAGAGTCAAATCCATTCTTGCCAACATGCGTATCCCGTCCACTAGATCACGAGCTTGTTGACCATGCCGCGTGAAA
>KR059565_Mediterranean_Europe
TTCATATAGTTTACTGTATATCTACCCTACACATATGCAGTACTAATCCAGCATAAACGTAATGTATGTACATTACATTTTATGATCTACTTCATGTGCACGTACATAATATTAATGTAACAAGGACATAGTATGTATATAGTACATTAAACGATTTTCCGCATGCATATTAAGCACGTACATTAGTATTAATGTAATAAGGACATAATATGTATATTGTACATTAAACGATCTTCCTCATGCATATAAGCATGTATAATACTTCTATTGGCAGTACATAGTACATTTTACTGCATATTCGTACATGGCACATAGAGTCAAATCCATTCTCGCCAACATGCGTATCCCGTCCACTAGATCACGAGCTTGTTGACCATGCCGCGTGAAA
>KR059566_Mediterranean_Europe
TTCATATAGTTTACTATATATCTACCCTACACATATGCAGTACTAATCCAGCATAAACGTAATGTATGTACATTACATTTTATGATCTACTTCATGTGCACGTACATAATATTAATGTAACAAGGACATAGTATGTATATAGTACATTAAACGATTTTCCACATGCATATTAAGCACGTACATCAGTATTAATGTAATAAGGACATAGTATGTATATTGTACATTAAACGATCTTCCTCATGCATATAAGCATGTACAATGCTTCTATCGGCAGTACATAGTACATTTTACTGCATATTCGTACATGGCACATAGAGTCAAATCCATTCTCGCCAACATGCGTATCCCGTCCACTAGATCACGAGCTTGTTGACCATGCCGCGTGAAA
>KR059567_Mediterranean_Europe
TTCATATAGTTTACTATATATCTACCCTACACATATGCAGTACTAATCCAGCATAAACGTAATGTATGTACATTACATTTTATGATCTACTTCATGTGCACGTACATAATATTAATGTAACAAGGACATAGTATGTATATAGTACATTAAACGATTTTCCACATGCATATTAAGCACGTACATCAGTATTAATGTAATAAGGACATAGTATGTATATTGTACATTAAACGATCTTCCTCATGCATATAAGCATGTACAATGCTTCTATCGGCAGTACATAGTACATTTTACTGCATATTCGTACATGGCACATAGAGTCAAATCCATTCTCGCCAACATGCGTATCCCGTCCACTAGATCACGAGCTTGTTGACCATGCCGCGTGAAA
>KR059568_Mediterranean_Europe
TTCATATAGTTTACTATATATCTACCCCACACATATGCAGTACTAATCCAGCATAAACGTAATGTATGTACATTACATTTTATGATCTACTTCATGTGCACGTACATAATATTAATGTAACAAGGACATAGTATGTATATAGTACATTAAACGATTTTCCACATGCATATTAAGCACGTACATCAGTATTAATGTAATAAGGACATAGTATGTATATTGTACATTAAACGATCTTCCTCATGCATATAAGCATGTACAATGCTTCTATTGGCAGTACATAGTACATTTTACTGCATATTCGTACATGGCACATAGAGTCAAATCCATTCTCGCCAACATGCGTATCCCGTCCACTAGATCACGAGCTTGTTGACCATGCCGCGTGAAA
>KR059569_Mediterranean_Europe
TTCATATAGTTTACTATATATCTACCCTACACATATGCAGTACTAATCCAGCATAAACGTAATGTATGTACATTACATTTTATGATCTACTTCATGTGCACGTACATAATATTAATGTAACAGGGACATAGTATGTATATAGTACATTAAACGATTTTCCACATGCATATTAAGCACGTACATCAGTATTAATGTAATAAGGACATAGTATGTATATTGTACATTAAACGATCTTCCTCATGCATATAAGCATGTACAATGCTTCTATTGGCAGTACATAGTACATTTTACTGCATATTCGTACATGGCACATAGAGTCAAATCCATTCTTGCCAACATGCGTATCCCGTCCACTAGATCACGAGCTTGTTGACCATGCCGCGTGAAA
>KR059573_Mediterranean_Europe
TTCATATAGTTTACTGTATATCTACCCTACACATATGCAGTACTAATCCAGCATAAACGTAATGTATGTACATTACATTTTATGATCTACTTCATGTGCACGTACATAATATTAATGTAACAAGGACATAGTATGTATATAGTACATTAAACGATTTTCCACATGCATATTAAGCACGTACATCAGTATTAATGTAATAAGGACATAGTATGTATATTGTACATTAAACGATCTTCCCCATGCATATAAGCATGTACAATACTTCTATCGACAGTACATAGTACATTTTGCTGCATACTCGTACATGGTACATAGAGTCAAATCCATTCTCGCCAACATGCGTATCCCGTCCACTAGATCACGAGCTTGTTGACCATGCCGCGTGAAA
>KR059574_Mediterranean_Europe
TTCATATAGTTTACTGTATATCTACCCTACACATATGCAGTACTAATCCAGCATAAACGTAATGTATGTACATTACATTTTATGATCTACTTCATGTGCACGTACATAATATTAATGTAACAAGGACATAGTATGTATATAGTACATTAAACGATTTTCCACATGCATATTAAGCACGTACATCAGTATTAATGTAATAAGGACATAATATGTATATTGTACATTAAACGATCTTCCTCATGCATATAAGCATGTATAATGTCTCTATCGGTAGTACATAGTACATTTTACTGCATATTCGTACATGGCACATAGAGTCAAATCCATTCTTGCCAACATGCGTATCCCGTCCACTAGATCACGAGCTTGTTGACCATGCCGCGTGAAA
>KR059601_Mediterranean_Europe
TTCATATAGTTTACTGTATATCTACCCTACACATATGCAGTACTAATCCAGCATAAACGTAATGTATGTACATTACATTTTATGATCTACTTCATGTGTACGTACATAATATTAATGTAACAAGGACATAGTATGTATATAGTACATTAAACGATTTTCCACATGCATATTAAGCACGTACATCAGTATTAATGTAATAAGGACATAATATGTATATTGTACATTAAACGATCTTCCTCATGCATATAAGCATGTATAATATTTCTATCGACAGTACATAGTACATTTTACTGCATATTCGTACATGGCACATAGGGTCAAATCCATTCTTGCCAACATGCGTATCCCGTCCACTAGATCACGAGCTTGTTGACCATGCCGCGTGAAA
>KR059603_Middle_East
TTCATATAGTTTACTGTATATCTACCCTACACATATGCAGTACTAATCCAGCATAAACGTAATGTATGTACATTACATTTTATGATCTACTTCATGTGTACGTACATAATATTAATGTAACAAGGACATAATATGTATATAGTACATTAAACGATTTTCCACATGCATATTAAGCACGTACATCAGTATTAATGTAATAAGGACATAATATGTATATTGTACATTAAACGATCTTCCTCATGCATATAAGCATGTATAATGTTTCTATCGGCAGTACATAGTACATTTTACTGCATATTCGTACATGGCACATAGAGTCAAATCCATTCTTGCCAACATGCGTATCCCGTCCACTAGATCACGAGCTTGTTGACCATGCCGCGTGAAA
>KR059604_Middle_East
TTCATATAGTTTACTGTATATCTACCCTACACATATGCAGTACTAATCCAGCATAAACGTAATGTATGTACATTACATTTTATGATCTACTTCATGTGTACGTACATAATATTAATGTAACAAGGACATAGTATGTATATAGTACATTAAACGATTTTCCACATGCATATTAAGCACGTACATCAGTATTAATGTAATAAGGACATAGTATGTATATCGTACATTAAACGATTTTCCTCATGCATATAAGCATGTATAATGTTTCTATCGGCAGTACATAGTACATTCTACTGCATATTCGTACATGGCACATAGAGTCAAATCCATTCTTGTCAACATGCGTATCCCGTCCACTAGATCACGAGCTTGTTGACCATGCCGCGTGAAA
>KR059606_Middle_Europe
TTCATATAGTTTACTGTATATCTACCCTACACATATGCAGTACTAATCCAGCATAAACGTAATGTATGTACATTACATTTTATGATCTACTTCATGTGTACGTACATAATATTAATGTAACAAGGACATAGTATGTATATAGTACATTAAACGATTTTCCACATGCATATTAAGCACGTACATCAGTATTAATGTAATAAGGACATAGTATGTATATTGTACATTAAACGATCTTCCTCATGCATATAAGCATGTATAATGTTTCTATCGGCAGTACATAGTACATTTTACTGCATATTCGTACATGGCACATAAAGTCAAATCCATTCTTGCCAACATGCGTATCCCGTCCACTAGATCACGAGCTTGTTGACCATGCCGCGTGAAA
>KR059607_Middle_Europe
TTCATATAGTTTACTGTATATCTACCCTACACATATGCAGTACTAATCCAGCATAAACGTAATGTATGTACATTACATTTTATGATCTACTTCATGTATACGTACATAATATTAATGTAACAAAGACATAGTATGTATATAGTACATTAAACGATTTTCCGCATGCATATTAAGCACGTACATCAGTATTAATGTAATAAGGACATAACATGTATATTGTACATTAAACGATCTTCCTCATGCATATAAGCATGTATAACGCTTCTATCGACAGTACATAGTACATTTTACTGCATATTCGTACATGGCACATAGAGTCAAATCCATTCTTGCCAACATGCGTATCCCGTCCACTAGATCACGAGCTTGTTGACCATGCCGCGTGAAA
>KR059608_Middle_Europe
TTCATATAGTTTACTGTATATCTACCCTACACATATGCAGTACTAATCCAGCATAAACGTAATGTATGTACATTACATTTTATGATCTACTTCATGTGTACGTACATAATATTAATGTAACAAGGACATAGTATGTATATAGTACATTAAACGATTTTCCACATGCATATTAAGCACGTACATCAGTATTAATGTAATAAGGACATAGTATGTATATTGTACATTAAACGATCTTCCCCATGCATATAAGCATGTATAATATTTCTATCGGCAGTACATAGTACATTTTACTGCATATTCGTACATGGCACATAGGGTCAAATCCATTCTTGCCAACATGCGTATCCCGTCCACTAGATCACGAGCTTGTTGACCATGCCGCGTGAAA
>KR059609_Middle_Europe
TTCATATAGTTTACTGTATATCTACCCTACACATATGCAGTACTAATCCAGCATAAACGTAATGTATGTACATTACATTTTATGATCTACTTCATGTGCACGTACATAATATTAATGTAACAAGGACATGGTATGTATATAGTACATTAAACGATTTTCCACATGCATATTAAGCACGTACATTAGTATTAATGTAATAAGGACATAATATGTATATTGTACATTAAACGATCTTCCTCATGCATATAAGCATGTATAATGTCTCTATTGGCAGTACATAGTACATTTTACTGCATATTCGTACATGGCACATAGAGTCAAATCCATTCTTGCCAACATGCGTATCCCGTCCACTAGATCACGAGCTTGTTGACCATGCCGCGTGAAA
>KR059610_Middle_Europe
TTCATATAGTTTACTGTATATCTACCCTACACATATGCAGTACTAATCCAGCATAAACGTAATGTATGTACATTACATTTTATGATCTACTTCATGTGCACGTACATAATATTAATGTAACAAGGACATAGTATGTATATAGTACATTAAACGATTTTCCACATGCATATTAAGCACGTACATTAGTATTAATGTAATAAGGACATAATATGTATATTGTACATTAAACGATCTTCCTCATGCATATAAGCATGTATAATACTTCTATTGGCAGTACATAGTACATTTTACTGCATATTCGTACATGGCACATAGAGTCAAATCCATTCTTGCCAACATGCGTATCCCGTCCACTAGATCACGAGCTTGTTCACCATGCCGCGTGAAA
>KR059611_Middle_Europe
TTCATATAGTTTACTGTATATCTACCCTACACATATGCAGTACTAATCCAGCATAAACGTAATGTATGTACATTACATTTTATGATCTACTTCATGTGCACGTACATAATATTAATGTAACAAGGACATAATATGTATATAGTACATTAAACGATCTTCCACATGCATATTAAGCACGTACATCAGTATTAATGTAATAAGGACATAGTATGTATATTGTACATTAAACGATCTTCCCCATGCATATAAGCATGTACAATGCTTCTATCGGCAGTACATAGTACATTTTACTGCATACTCGTACATAGCACATGGAGTCAAATCCATTCTCGCCAACATGCGTATCCCGTCCACTAGATCACGAGCTTGTTGACCATGCCGCGTGAAA
>KR059612_Middle_Europe
TTCATATAGTTTACTGTATATCTACCCTACACATATGCAGTACTAATCCAGCATAAACGTAATGTATGTACATTACATTTTATGATCTACTTCATGTGCACGTACATAATATTAATGTAACAAGGACATAGTATGTATATAGTACATTAAACGATTTTCCACATGCATATTAAGCACGTACATCAGTATTAATGTAATAAGGACATAATATGTATATTGTACATTAAACGATCTTCCTCATGCATATAAGCATGTATAATGTTTCTATCGGCAGTACATAGTACATTTTACTGCATATTCGTACATAGTACATAGAGTCAAATCCATTCTTGCCAACATGCGTATCCCGTCCACTAGATCACGAGCTTGTCGACCATGCCGCGTGAAA
>KR059616_Middle_East
TTCATATAGTTTACTGTATATCTACCCTACACATATGCAGTACTAATCCAGCATAAACGTAATGTATGTACATTACATTTTATGATCTACTTCATGTGTACGTACATAATATTAATGTAACAAGGACATAGTATGTATATAGTACATTAAACGATTTTCCACATGCATATTAAGCACGTACATCAGTATTAATGTAATAAGGACATAGTATGTATATTGTACATTAAACGATCTTCCTCATGCATATAAGCATGTATAATGTTTCTATCGGCAGTACATAGTACATTTTACTGCATATTCGTACATGGCACATAGAGTCAAATCCATTCTTGCCAACATGCGTATCCCGTCCACTAGATCACGAGCTTGTTGACCATGCCGCGTGAAA
>KR059618_Middle_East
TTCATATAGTTTACTGTATATCTACCCTACACATATGCAGTACTAATCCAGCATAAACGTAATGTATGTACATTACATTTTATGATCTACTTCATGTGTACGTACATAATATTAATGTAACAAGGACATAGTATGTATATAGTACATTAAACGATTTTCCACATGCATATTAAGCACGTACATCAGTATTAATGTAATAAGGACATAATATGTATATTGTACATTAAACGATCTTCCTCATGCATATAAGCATGTATAATACTTCTATCGGCAGTACATAGTACATTTTACTGCATATTCGTACATGGCGCATAGAGTCAAATCCATTCTTGCCAACATGCGTATCCCGTCCACTAGATCACGAGCTTGTTGACCATGCCGCGTGAAA
>KR059625_Middle_East
TTCATATAGTTTACTGTATATCTACCCTACACATATGCAGTACTAATCCAGCATAAACGTAATGTATGTACATTACATTTTATGATCTACTTCATGTGTACGTACATAATATTAATGTAATAAGGACATAGTATGTATATAGTACATTAAACGATTTTCCACATGCATATTAAGCACGTACATCAGTATTAATGTAATAAGGACATAGTATGTATATTGTACATTAAACGATCTTCCTCATGCATATAAGCATGTATAATGTTTCTATCGGCAGTACATAGTACATTTTACTGCATATTCGTACATAGCACATAGAGTCAAATCCATTCTTGCCAACATGCGTATCCCGTCCACTAGATCACGAGCTTGTTGACCATGCCGCGTGAAA
>KR059626_Middle_East
TTCATATAGTTTACTGTATATCTACCCTACACATATGCAGTACTAATCCAGCATAAACGTAATGTATGTACATTACATTTTATGATCTACTTCATGTGTACGTACATAATATTAATGTAACAAGGACATAGTATGTATATAGTACATTAAACGATTTTCCACATGCATATTAAGCATGTACATCAGTATTAATGTAATAAAGACATAGTATGTATATTGTACATTAAACGATCTTCCCCATGCATATAAGCATGTATAATGTTTCTATCGGCAGTACATAGTACATTTTACTGCATATTCGTACATGGCACATAGAGTCAAATCCATTCTTGCCAACATGCGTATCCCGTCCACTAGATCACGAGCTTGTTGACCATGCCGCGTGAAA
>KR059628_Mediterranean_Europe
TTCATATAGTTTACTGTATATCTACCCTACACATATGCAGTACTAATCCAGCATAAACGTAATGTATGTACATTACATTTTATGATCTACTTCATGTGCACGTACATAATATTAATGTAACAAGGACATAATATGTATATAGTACATTAAACGATTTTCCACATGCATATTAAGCACGTACATCAGTATTAATGTAATAAGGACATAGTATGTATATCGTACATTAAACGATCTTCCTCATGCATATAAGCATGTACAATGCTTCTATCGGCAGTACATAGTACATTTTACTGCATATTCGTACATGGCACATGGAGTCAAATCCATTCTCGTCAACATGCGTATCCCGTCCACTAGATCACGAGCTTGTTGACCATGCCGCGTGAAA
>KR059630_Mediterranean_Europe
TTCATATAGTTTACTGTATATCTACCCTACACATATGCAGTACTAATCCAGCATAAACGTAATGTATGTACATTACATTTTATGATCTACTTCATGTGCACGTACATAATATTAATGTAACAAGGACATAGTATGTATATAGTACATTAAACGATTTTCCACATGCATATTAAGCACGTATATCAGTATTAATGTAATAAGGACATAATATGTATATTGTACATTAAACGATCTTCCTCATGCATATAAGCATGTATAATGCCTCTATTGGCAGTACATAGTACATTTTACTGCATATTCGTACATGGCACATAGAGTCAAATCCATTCTCGCCAACATGCGTATCCCGTCCACTAGATCACGAGCTTGTTGACCATGCCGCGTGAAA
>KR059631_Mediterranean_Europe
TTCATATAGTTTACTGTATATCTACCCTACACATACGCAGTACTAATCCAGCATAAACGTAATGTATGTACATTACATTTTATGATCTACTTCATGTGTACGTACATAGTATTAATGTAACAAGGACATAGTATGTATATAGTACATTAAACGATTTTCCACATGCATATTAAGCACGTACATCAGTATTAATGTAATAAGGACATAACATGTATATTGTACATTAAACGATCTTCCCCATGCATATAAGCATGTATAACACTTCTATCGGCAGTACATAGTGCATTTTACTGCATATTCGTACATGGCACATAGAGTCAAATCCATTCTTGCCAACATGCGTATCCCGTCCACTAGATCACGAGCTTGTCGACCATGCCGCGTGAAA
>KR059642_Mediterranean_Europe
TTCATATAGTTTACTGTATATCTACCCTACACATATGCAGTACTAATCCAGCATAAACGTAATGTATGTACATTACATTTTATGATCTACTTCATGTGCACGTACATAATATTAATGTAACAAGGACATAGTATGTATATAGTACATTAAACGATTTTCCACATGCATATTAAGTACGTACATCAGTATTAATGTAATAAGGACATAATATGTATATTGTACATTAAACGATCTTCCTCATGCATATAAGCATGTACAATGCTTCTATCGGCAGTACATAGTACATTTTACTGCATATTCGTACATGGCACATGGAGTCAAATCCATTCTCGCCAACATGCGTATCCCGTCCACTAGATCACGAGCTTGTTGACCATGCCGCGTGAAA
>KR059661_Middle_East
TTCATATAGTTTACTGTATATCTACCCTACACATATGCAGTACTAATCCAGCATAAACGTAATGTATGTACATTACATTTTATGATCTACTTCATGTGTACGTACATAATATTAATGTAACAAGGACATAGTATGTATATAGTACATTAAACGATTTTCCACATGCATATTAAGCACGTACATCAGTATTAATGTAATAAGGACATAGTATGTATATTGTACATTAAACGATCTCCCTCATGCATATAAGCATGTATAATGCTTCTATCGGCAGTACATAGTACATTTTACTGCATATTCGTACATGGCACATAGAGTCAAATCCATTCTTGCCAACATGCGTATCCCGTCCATTAGATCACGAGCTTGTTGACCATGCCGCGTGAAA
>KR059662_Middle_East
TTCATATAGTTTACTGTATATCTACCCTACACATATGCAGTACTAATCCAGCATAAACGTAATGTATGTACATTACATTTTATGATCTACTTCATGTGTACGTACATAATATTAATGTAACAAGGACATAGTATGTATATAGTACATTAAACGATTTTCCACATGCATATTAAGCACGTACATCAGTATTAATGTAGTAAGGACATAATATGTATATTGTACATTAAACGATCTTCCTCATGCATATAAGCATGTATAATGCTTCTATCGGCAGTACATAGTACATTTTACTGCATATTCGTACATGGCACATAGAGTCAAATCCATTCTTGTCAACATGCGTATCCCGTCCATTAGATCACGAGCTTGTTGACCATGCCGCGTGAAA
>KR059672_Middle_East
TTCATATAGTTTACTGTATATCTACCCTACACATATGCAGTACTAATCCAGCATAAACGTAATGTATGTACATTACATTTTATGATCTACTTCATGTGTACGTACATAATATTAATGTAACAAGGACATAGTATGTATATAGTACATTAAACGATTTTCCACATGCATATTAAGCACGTACATCAGTATTAATGTAATAAGGACATAGTATGTATATCGTACATTAAACGATTTTCCTCATGCATATAAGCATGTATAATACTTCTATCGGCAGTACATAGTACATTCTACTGCATACTCGTACATGGCACATAGAGTCAAATCCATTCTTGCCAACATGCGTATCCCGTCCATTAGATCACGAGCTTGTTGACCATGCCGCGTGAAA
>KR059673_Middle_East
TTCATATAGTTTACTGTATATCTACCCTACACATATGCAGTACTAATCCAGCATAAACGTAATGTATGTACATTACATTTTATGATCTACTTCATGTGTACGTACATAATATTAATGTAACAAGGACATAGTATGTATATAGTACATTAAACGATTTTCCACATGCATATTAAGCACGTACATCAGTATTAATGTAATAAGGACATAGTATGTATATCGTACATTAAACGATTTTCCTCATGCATATAAGCATGTATAATACTTCTATCGGCAGTACATAGTACATTCTACTGCATACTCGTACATGGCACATAGAGTCAAATCCATTCTTGCCAACATGCGTATCCCGTCCATTAGATCACGAGCTTGTTGACCATGCCGCGTGAAA
>KR059687_Middle_East
TTCATATAGTTTACTGTATATCTACCCTACACATATGCAGTACTAATCCAGCATAAACGTAATGTATGTACATTACATTTTATGATCTACTTCATGTGTACGTACATAATATTAATGTAACAAGGACATAGTATGTATATAGTACATTAAACGATTTTCCACATGCATATTAAGCACGTACATCAGTATTAATGTAATAAGGACATAGTATGTATATTGTACATTAAACGATCTTCCCCATGCATATAAGCATGTATAATACTTCTATCGGCAGTACATAGTACATTTTACTGCATATTCGTACATGGCACATAGAGTCAAATCCATTCTTGCCAACATGCGTATCCCGTCCACTAGATCACGAGCTTGTTGACCATGCCGCGTGAAA
>KR059688_Middle_East
TTCATATAATTTACTGTATATCTACCCTACACATATGCAGTACTAATCCAGCATAAACGTAATGTATGTACATTACATTTTATGATCTACTTCATGTGTACGTACATAATATTAATGTAACAAGGACATAGTATGTATATAGTACATTAAACGATTTTCCACATGCATATTAAGCACGTACATCAGTATTAATGTAATAAGGACATAGTATGTATATCGTACATTAAACGATCTTCCTCATGCATATAAGCATGTACAATGCTTCTATCGGTAGTACATAGTACATTTTACTGCATATTCGTACATGGCACATAGAGTCAAATCCATTCTTGTCAACATGCGTATCCCGTCCACTAGATCACGAGCTTGTTGACCATGCCGCGTGAAA
>KR059689_Middle_East
TTCATATAGTTTACTGTATATCTACCCTACACATATGCAGTACTAATCCAGCATAAACGTAATGTATGTACATTACATTTTATGATCTACTTCATGTGTACGTACATAATATTAATGTAACAAGGACATAGTATGTATATAGTACATTAAACGATTTTCCACATGCATATTAAGCACGTACATCAGTATTAATGTAATAAGGACATAGTATGTATATTGTACATTAAACGATCTTCCTCATGCATATAAGCATGTATAATACTTCTATCGGCAGTACATAGTACATTTTACTGCATATTCGTACATGGCACATAGAGTCAAATCCATTCTTGCCAACATGCGTATCCCGTCCACTAGATCACGAGCTTGTTGACCATGCCGCGTGAAA
>KR059690_Mediterranean_Europe
TTCATATAGTTTACTGTATATCTACCCTACACATATGCAGTACTAATCCAGCATAAACGTAATGTATGTACATTACATTTTATGATCTACTTCATGCGCACATACATAATATTAATGTAACAAGGACATAGTATGTATATAGTACATTAAACGATTTTCCGCATGCATATTAAGCACGTACATCAGTATTAATGTAATAAGGACATAGTATGTATATTGTACATTAAACGATCTTCCTCATGCATATAAGCATGTATAATACTTCTATCGGCAGTACATAGTACATTTTACTGCATATTCGTACATGGCACATAGAGTCAAATCCATTCTTGCCAACATGCGTATCCCGTCCACTAGATCACGAGCTTGTTGACCATGCCGCGTGAAA
>KR059691_Mediterranean_Europe
TTCATATAGTTTACTGTATATCTACCCTACACATATGCAGTACTAATCCAGCATAAACGTAATGTATGTACATTACATTTTATGATCTACTTCATGTGTACGTACATAATATTAATGTAACAAGGACATAGTATGTATATAGTACATTAAACGATTTTCCACATGCATATTAAGCACGTACATCAATATTAATGTAATAAGGACATAGTATGTATATTGTACATTAAACGATCTTCCTCATGCATATAAGCATGTATAATGTTTCTATCGGCAGTACATAGTACATTTTACTGCATATTCGTACATGGCACATAGAGTCAAATCCATTCTTGCCAACATGCGTATCCCGTCCACTAGATCACGAGCTTGTTGACCATGCCGCGTGAAA
>KR059692_Mediterranean_Europe
TTCATATAGTTTACTGTACATCTACCCTACACATATGCAGTACTAATCCAGCATAAACGTAATGTATGTACATTACATTTTATGATCTACTTCATGTGTACGTACATAATATTAATGTAACAAGGACATAGTATGTATATAGTACATTAAACGATTTTCCACATGCATATTAAGCACGTACATCAGTATTAATGTAATAAGGACATAGTATGTATATTGTACATTAAACGATCTTCCTCATGCATATAAGCATGTATAATATTTCTATTGGCAGTACATAGTACATTTTACTGCATATTCGTACATGGCACATAGGGTCAAATCCATTCTTGTCAACATGCGTATCCCGTCCACTAGATCACGAGCTTGTTGACCATGCCGCGTGAAA
>KR059693_Mediterranean_Europe
TTCATATAGTTTACTGTATATCTACCCTACACATATGCAGTACTAATCCAGCATAAACGTAATGTATGTACATTACATTTTATGATCTACTTCATGTGTACGTACATAATATTAATGTAACAAGGACATAGTATGTATATAGTACATTAAACGATTTTCCACATGCATATTAAGCACGTACATCAGTATTAATGTAATAAGGACATAGTATGTATATTGTACATTAAACGATCTCCCCCATGCATATAAGCATGTATAATATTTCTATCGGCAGTACATAGTACATTTTACTGCATATTCGTACATAGCACATAGGGTCAAATCCATTCTTGTCAACATGCGTATCCCGTCCACTAGATCACGAGCTTGTTGACCATGCCGCGTGAAA
>KR059700_Mediterranean_Europe
TTCATATAGTTTACTGTATATCTACCCTACACATATGCAGTACTAATCCAGCATAAACGTAATGTATGTACATTACATTTTATGATCTACTTCATGTGCACGTACATAATATTAATGTAACAAGGACATAGTATGTATATAGTACATTAAACGATTTTCCACATGCATATTAAGCACGTATATCAGTATTAATGTAATAGGGACATAATATGTATATTGTACATTAAACGATCTTCCCCATGCATATAAGCATGTATAATACCTCTATTGGCAGTACATAGTACATTTTACTGCATATTCGTACATGGCACATAGAGTCAAATCCATTCTTGCCAACATGCGTATCCCGTCCACTAGATCACGAGCTTGTTGACCATGCCGCGTGAAA
>KR059701_Mediterranean_Europe
TTCATATAGTTTACTGTATATCTACCCTACACATATGCAGTACTAATCCAGCATAAACGTAATGTATGTACATTACATTTTATGATCTACTTCATGTGCACGTACATAATATTAATGTAACAAGGACATAGTATGTATATAGTACATTAAACGATTTTCCACATGCATATTAAGCACGTATATCAGTATTAATGTAATAGGGGCATAATATGTATATTGTACATTAAACGATCTTCCCCATGCATATAAGCATGTATAATACCTCTATTGGCAGTACATAGTACATTTTACTGCATATTCGTACATGGCACATAGAGTCAAATCCATTCTTGCCAACATGCGTATCCCGTCCACTAGATCACGAGCTTGTTGACCATGCCGCGTGAAA
>KR059702_Mediterranean_Europe
TTCATATAGTTTACTGTATATCTACCCTACACATATGCAGTACTAATCCAGCATAAACGTAATGTATGTACATTACATTTTATGATCTACTTCATGTGTGCGTACATAATATTAATGTAACAAGGACATAGTATGTATATAGTACATTAAACGATTTTCCGCATGCATATTAAGCACGTACATCAGTATTAATGTAATAAGGACATAGTATGTATATTGTACATTAAACGATCTTCCTCATGCATATAAGCATGTATAATGTCTCTATCGGCAGTACATAGTACATTTTACTGCATATTCGTACATGGCACATAGAGTCAAATCCATTCTTGCCAACATGCGTATCCCGTCCACTAGATCACGAGCTTGTTGACCATGCCGCGTGAAA
>KR059703_Middle_East_HGB
TTCATATAGTTTACTATATATCTACCCTACACATATGCAGTACTAATCCAGCATAAACGTAATGTATGTACATTACATTTTATGATCTACTTCACGTGTACGTACATAATATTAATGTAACAAGGACATAATATGTATATAGTACATTAAACGATTTTCCACATGCATATTAAGCACGTATATCAGTATTAATGTAATAAAGACATAATATGTATATCGTGCATTAAACGATCTCCCTCATGCATATAAGCACGTACAATGTCCTTATTAGCAGTACATGGTACATTTTACTGTATACTCGTACATAGCACATAAAGTCAAATCTATCCTTGTCAACATGCGTATCCCGTCCATTAGATCACGAGCTTGTCGACCATGCCGCGTGAAA
>KR059704_Middle_East
TTCATATAGTTTACTGTATATCTACCCTACACATATGCAGTACTAATCCAGCATAAACGTAATGTATGTACATTACATTTTATGATCTACTTCATGTGTACGTACATAATATTAATGTAACAAGGACATAGTATGTATATAGTACATTAAACGATTTTCCGCATGCATATTAAGCACGTACATCAGTATTAATGTAATAAGGACATAATATGTATATTGTACATTAAACGATCTTCCCCATGCATATAAGCATGTATAATGTTTCTATTGGCAGTACATAGTACATTTTACTGCATATTCGTACATGGCACATAGAGTCAAATCCATTCTTGCCAACATGCGTATCCCGTCCACTAGATCACGAGCTTGTTGACCATGCCGCGTGAAA
>KR059705_Middle_East
TTCATATAGTTTACTGTATATCTACCCTACACATATGCAGTACTAATCCAGCATAAACGTAATGTATGTACATTACATTTTATGATCTACTTCATGTGTACGTACATAATATTAATGTAACAAGGACATAGTATGTATATAGTACATTAAACGATTTTCCACATGCATATTAAGCACGTACATCAGTATTAATGTAATAAGGACATAGTATGTATATCGTACATTAAACGATCTTCCTCATGCATATAAGCATGTATAATGCTTCTATCGGCAGTACATAGTACATTTTACTGCATATTCGTACATGGCACATAGAGTCAAATCCATTCTTGTCAACATGCGTATCCCGTCCACTAGATCACGAGCTTGTTGACCATGCCGCGTGAAA
>KR059719_Mediterranean_Europe
TTCATATAGTTTACTGTATATCTACCCTACACATATGCAGTACTAATCCAGCATAAACGTAATGTATGTACATTACATTTTATGATCTACTTCATGTGCACGTACATAATATTAATGTAACAAGGACATAGTATGTATATAGTACATTAAACGATTTTCCACATGCATATTAAGCACGTACATCAGTATTAATGTAATAAGGACATAATATGTATATTGTACATTAAACGATCTTCCTCATGCATATAAGCATGTATAATGTCTCTATTGGCAGTACATAGTACATTTTACTGCATATTCGTACATGGCACATAGAGTCAAATCCATTCTTGCCAACATGCGTATCCCGTCCACTAGATCACGAGCTTGTTGACCATGCCGCGTGAAA
>KR059720_Mediterranean_Europe
TTCATATAGTTTACTGTATATCTACCCTACACATATGCAGTACTAATCCAGCATAAACGTAATGTATGTACATTACATTTTATGATCTACTTCATGTGTACGTACATAATATTAATGTAACAAGGACATAGTATGTATATAGTACATTAAACGATTTTCCACATGCATATTAAGCACGTACATCAGTATTAATGTAATAAGGACATAATATGTATATTGTACATTAAACGATCTTCCTCATGCATATAAGCATGTATAACGCTTCTATCGGCAGTACATAGTACATTTTATTGCATATTCGTACATGGCACATAAAGTCAAATCTATTCTTGCCAACATGCGTATCCCGTCCACTAGATCACGAGCTTGTTGACCATGCCGCGTGAAA
>KR059734_Middle_East
TTCATATAGTTTACTGTATATCTACCCTACACATGTGCAGTACTAATCCAGCATAAACGTAATGTATGTACATTACATTTTATGATCTACTTCATGTGTACGTACATAATATTAATGTAACAAGGACATAGTATGTATATAGTACATTAAACGATTTTCCACATGCATATTAAGCGCGTACATCAGTATTAATGTAATAAGGACATAATATGTATATTGTACATTAAACGATCTTCCTCATGCATATAAGCATGTATAATGCTTCTATCGGCAGTACATAGTACATCTTACTGCATATTCGTACATGGCACATAGAGTCAAATCCATTCTTGCCAACATGCGTATCCCGTCCACTAGATCACGAGCTTGTTGACCATGCCGCGTGAAA
>KR059735_Middle_East
TTCATATAGTTTACTGTATATCTACCCTACACATGTGCAGTACTAATCCAGCATAAACGTAATGTATGTACATTACATTTTATGATCTACTTCATGTGTACGTACATAATATTAATGTAACAAGGACATAGTATGTATATAGTACATTAAACGATTTTCCACATGCATATTAAGCGCGTACATCAGTATTAATGTAATAAGGACATAATATGTATATTGTACATTAAACGATCTTCCTCATGCATATAAGCATGTATAATGCTTCTATCGGCAGTACATAGTACATCTTACTGCATATTCGTACATGGCACATAGAGTCAAATCCATTCTTGCCAACATGCGTATCCCGTCCACTAGATCACGAGCTTGTTGACCATGCCGCGTGAAA
>KR059736_Middle_East
TTCATATAGTTTACTGCATATCTACCCTACACATATGCAGTACTAATCCAGCATAAACGTAATGTATGTACATTACATTTTATGATCTACTTCATGTGTACGTACATAATATTAATGTAACAGGGACATAGTATGTATATAGTACATTAAACGATTTTCCACATGCATATTAAGTACGTACATCAGTATTAATGTAATAAGGACATAATATGTATATTGTACATTAAACGATCTTCCTCATGCATATAAGCATGTATAATGCTTCTATTGACAGTACATAGTACATTTTACTGCATATTCGTACATGGCACATAGAGTCAAATCCATCCCTGTCAACATGCGTATCCCGTCCATTAGATCACGAGCTTGTTGACCATGCCGCGTGAAA
>KR059737_Middle_East
TTCATATAGTTTACTGTATATCTACCCTACACATATGCAGTACTAATCCAGCATAAACGTAATGTATGTACATTACATTTTATGGTCTACTTCATGTGCACGTACATAATATTAATGTAACAAGGACATAGTATGTATATAGTACATTAAACGATTTTCCACATGCATATTAAGCACGTACATCAGTATTAATGTAATAAGGACATAATATGTATATCGTACATTAAACGATCTTCCTCATGCATATAAGCATGTATAATGCTTCTATCGGCAGTACATAGTACATTTTACTGCATACTCGTACATGGCACATAGAGTCAAATCCATTCTTGCCAACATGCGTATCCCGCCCACTAGATCACGAGCTTGTTGACCATGCCGCGTGAAA
>KR059738_Middle_East
TTCATATAGTTTACTGTATATCTACCCTACACATATGCAGTACTAATCCAGCATAAACGTAATGTATGTACATTATATTTTATGATCTACTTCATGTGTACGTACATAATATTAATGTAACAAGGACATAATATGTATATAGTACATTAAACGATTTTCCGCATGCATATTAAGCACGTACATCAGTATTAATGTAATGAGGACATAGTATGTATATTGTACATTAAACGATTTTCCTCATGCATATAAGCATGTATAATGTTTCTATCGGCAGTACATAGTACATTCTACTGCATATTCGTACATGGCACATAGAGTCAAATCCATTCTTGCCAACATGCGTATCCCGTCCACTAGATCACGAGCTTGTTGACCATGCCGCGTGAAA
>KR059739_Mediterranean_Europe
TTCATATAGTTTACTGTATATCTACCCTACACATATGCAGTACTAATCCAGCATAAACGTAATGTATGTACATTACATTTTATGATCTACTTCATGTGCACGTACATAATATTAATGTAACAAGGACATAGTATGTATATAGTACATTAAACGATTTTCCACATGCATATTAAGCACGTACATTAGTATTAATGTAATAAGGACATAATATGTATATTGTACATTAAACGATCTTCCTCATGCATATAAGCATGTATAATGCCTCTATTGGCAGTACATAGTACATTTTACTGCATATTCGTACATAGCACATAGAGTCAAATCCATTCTTGCCAACATGCGTATCCCGTCCACTAGATCACGAGCTTGTTGACCATGCCGCGTGAAA
>KR059740_Mediterranean_Europe
TTCATATAGTTTACTGTATATCTACCCTACACATATGCAGTACTAATCCAGCATAAACGTAATGTATGTACATTACATTTTATGATCTACTTCATGTGTACGTACATAATATTAATGTAACAAGGACATAGTATGTATATAGTACATTAAACGATTTTCCGCATGCATATTAAGCACGTACATCAGTATTAATGTAATAAGGACATAACATGTATATTGTACATTAAACGATCTTCCTCATGCATATAAGCATGTATAACGCTTCTATCGGCAGTACATAGTACATTTTACTGCATATTCGTACATGGCACATAGAGTCAAATCCATTCTTGCCAACATGCGTATCCCGTCCACTAGATCACGAGCTTGTTGACCATGCCGCGTGAAA
>KR059741_Mediterranean_Europe
TTCATATAGTTTACTGTATATCTACCCTACACATATGCAATACTAATCCAGCATAAACGTAATGTATGTACATTACATTTTATGATCTACTTCATGTGCACGTACATAATATTAATGTAACAAGGACATAGTATGTATATAGTACATTAAACGATTTTCCACATGCATATTAAGCACGTACATCAGTATTAATGTAATAAAGACATAATATGTATATTGTACATTAAACGATCTTCCTCATGCATATAAGCATGTATAATGTCTCTATTGGCAGTACATAGTACATTTTACTGCATATTCGTACATGGCACATAGAGTCAAATCCATTCTTGCCAACATGCGTATCCCGTCCACTAGATCACGAGCTTGTTGACCATGCCGCGTGAAA
>KR059742_Mediterranean_Europe
TTCATATAGTTTACTGTATATCTACCCTACACATATGCAATACTAATCCAGCATAAACGTAATGTATGTACATTACATTTTATGATCTACTTCATGTGCACGTACATAATATTAATGTAACAAGGACATAGTATGTATATAGTACATTAAACGATTTTCCACATGCATATTAAGCACGTACATCAGTATTAATGTAATAAAGACATAATATGTATATTGTACATTAAACGATCTTCCTCATGCATATAAGCATGTATAATGTCTCTATTGGCAGTACATAGTACATTTTACTGCATATTCGTACATGGCACATAGAGTCAAATCCATTCTTGCCAACATGCGTATCCCGTCCACTAGATCACGAGCTTGTTGACCATGCCGCGTGAAA
>KR059776_Middle_East
TTCATATAGTTTACTGTATATCTACCCTACACATATGCAGTACTAATCCAGCATAAACGTAATGTATGTACATTACATTTTATGATCTACTTCATGTGTACGTACATAATATTAATGTAACAGGGACATAGTATGTATATAGTACATTAAACGATTTTCCACATGCATATTAAGCACGTACATTAGTATTAATGTAATAAGGACATAGTATGTATATTGTACATTAAACGATCTTCCCCATGCATATAAGCATGTATAATGCTTCTATCGACAGTACATAGTACATTTTACTGCATATTCGTACATGGCACATAGAGTCAAATCCATTCCTGTCAACATGCGTATCCCGTCCACTAGATCACGAGCTTGTTGACCATGCCGCGTGAAA
>KR059777_North_Africa
TTCATATAGTTTACTGTATATCTACCCTACACATATGCAGTACTAATCCAGCATAAACGTAATGTATGTACATTACATTTTATGATCTACTTCATGTGTACGTACATAATATTAATGTAACAAGGACATAGTATGTATATAGTACATTAAACGATTTTCCACATGCATATTAAGCACGTACATCAGTATTAATGTAATAAGGACATAATATGTATATTGTACATTAAACGATCTTCCTCATGCATATAAGCATGTATAATGTTTCTATCGGCAGTACATAGTACATTTTACTGCATATTCGTACATGGCACATAGAGTCAAATCCATTCTTGCCAACATGCGTATCCCGTCCACTAGATCACGAGCTTGTTGACCATGCCGCGTGAAA
>KR059779_North_Africa
TTCATATAGTTTACTGTATATCTACCCTACACATATGCAGTACTAATCCAGCATAAACGTAATGTATGTACATTACATTTTATGATCTACTTCATGTGTACGTACATAATATTAATGTAACAAGGACATAGTATGTATATAGTACATTAAACGATTTTCCACATGCATATTAAGCACGTACATCAGTATTAATGTAATAAGGACATAATATGTATATTGTACATTAAACGATCTTCCTCATGCATATAAGCATGTATAATGTTTCTATCGGCAGTACATAGTACATTTTACTGCATATTCGTACATGGCACATAGAGTCAAATCCATTCTTGCCAACATGCGTATCCCGTCCACTAGATCACGAGCTTGTTGACCATGCCGCGTGAAA
>KR059780_North_Africa
TTCATATAGTTTACTGTATATCTACCCTACACATATGCAGTACTAATCCAGCATAAACGTAATGTATGTACATTACATTTTATGATCTACTTCATGTGTACGTACATAATATTAATGTAACAAGGACATAGTATGTATATAGTACATTAAACGATTTTCCACATGCATATTAAGCACGTACATCAGTATTAATGTAATAAGGACATAATATGTATATTGTACATTAAACGATCTTCCTCATGCATATAAGCATGTATAATATTTCTACCGGCAGTACATAGTACATTTTACTGCATATTCGTACATGGCACATAGAGTCAAATCCATTCTTGCCAACATGCGTATCCCGTCCACTAGATCACGAGCTTGTCGACCATGCCGCGTGAAA
>KR059781_North_Africa
TTCATATAGTTTACTGTATATCTACCCTACACATATGCAGTACTAATCCAGCATAAACGTAATGTATGTACATTACATTTTATGATCTACTTCATGTGTACGTACATAATATTAATGTAACAAGGACATAGTATGTATATAGTACATTAAACGATTTTCCACATGCATATTAAGCACGTACATCAGTATTAATGTAATAAGGACATAGTATGTATATTGTACATTAAACGATCTTCCCCATGCATATAAGCATGTATAATATTTCTATCGGCAGTACATAGTACATTTTACTGCATATTCGTACATGGCACATAGGGTCAAATCCATTCTTGCCAACATGCGTATCCCGTCCACTAGATCACGAGCTTGTTGACCATGCCGCGTGAAA
>KR059782_North_Africa
TTCATATAGTTTACTGTATATCTACCCTACACATATGCAGTACTAATCCAGCATAAACGTAATGTATGTACATTACATTTTATGATCTACTTCATGTGTACGTACATAATATTAATGTAACAAGGACATAATATGTATATAGTACATTAAACGATTTCCCACATGCATATTAAGCACGTACATTAGTATTAATGTAATAAGGACATAATATGTATATTGTACATTAAACGATCTTCCTCATGCATATAAGCATGTATAATGTTTCTATCGGCAGTACATAGTACATTTTACTGCATATTCGTACATGGCACATAGAGTCAAATCCATTCTTGCCAACATGCGTATCCCGTCCACTAGATCACGAGCTTGTTGACCATGCCGCGTGAAA
>KR059783_North_Africa
TTCATATAGTTTACTGTATATCTACCCTACACATATGCAGTACTAATCCAGCATAAACGTAATGTATGTACATTACATTTTATGATCTACTTCATGTGTACGTACATAATATTAATGTAACAAGGACATAGTATGTATATAGTACATTAAACGATTTTCCACATGCATATTAAGTACGTACATCAGTATTAATGTAATAAGGACATAGTATGTATATTGTACATTAAACGATCTTCCTCATGCATATAAGCATGTATAATACTTCTATCGGCAGTACATAGTACATTTTACTGCATATTCGTACATAGCACATAGAGTCAAATCTATTCTTGTCAACATGCGTATCCCGTCCACTAGATCACGAGCTTGTTGACCATGCCGCGTGAAA
>KR059811_North_Africa
TTCATATAATTTACTGTATATCTACCCTACACATATGCAGTACTAATCCAGCATAAACGTAATGTATGTACATTACATTTTATGATCTACTTCATGTGTACGTACATAATATTAATGTAACAAGGACATAATATGTATATAGTACATTAAACGATTTTCCACATGCATATTAAGCACGTACATTAGTATTAATGTAATAAGGACATAATATGTATATTGTACATTAAACGATCTTCCTCATGCATATAAGCATGTATAATGTTTCTATCGGCAGTACATAGTACATTTTACTGCATATTCGTACATGGCACATAGAGTCAAATCCATTCTTGCCAACATGCGTATCCCGTCCATTAGATCACGAGCTTGTTGACCATGCCGCGTGAAA
>KR059812_North_Africa
TTCATATAGTTTACTGTATATCTACCCTACACATATGCAGTACTAATCCAGCATAAACGTAATGTATGTACATTACATTTTATGATCTACTTCATGTGTACGTACATAATATTAATGTAACAAGGACATAGTATGTATATAGTACATTAAACGATTTTCCACATGCATATTAAGCACGTACATCAGTATTAATGTAACAAGGACATAGTATGTATATTGTACATTAAACGATCTTCCTCATGCATATAAGCATGTATAATACTTCTATTGGCAGTACATAGTACATTTTACTGCATATTCGTACATGGCACATAGAGTCAAATCCATTCTTGCCAACATGCGTATCCCGTCCACTAGATCACGAGCTTGTTGACCATGCCGCGTGAAA
>KR059813_North_Africa
TTCATATAGTTTACTGTATATCTACCCTACACATATGCAGTACTAATCCAGCATAAACGTAATGTATGTACATTACATTTTATGATCTACTTCATGTGTACGTACATAATATTAATGTAACAAGGACATAATATGTATATAGTACATTAAACGATTTTCCACATGCATATTAAGCACGTACATCAATATTAATGTAATAAGGACATAGTATGTATACTGTACATTAAACGATCTTCCTCATGCATATAAGCATGTATAATATTTCTATCGGCAGTACATAGTACATTCCACTGCATATTCGTACATGGCACATAGAGTCAAATCCATTCTTGTCAACATGCGTATCCCGTCCACTAGATCACGAGCTTGTTGACCATGCCGCGTGAAA
>KR059815_North_Africa
TTCATATAGTTTACTGTATATCTACCCTACACATATGCAGTACTAATCCAGCATAAACGTAATGTACGTACATTACATTTTATGATCTACTTCATGTGTACGTACATAATATTAATGTAACAAGGACATAGTATGTATATAGTACATTAAACGATTTTCCACATGCATATTAAGCACGTACATCAGTATTAATGTAATAGGGACATAGTATGTATATTGTACATTAAACGATCTTCCTCATGCATATAAGCATGTACAATGTTTCTATCGACAGTACATAGTACATCTCACTGCATATTCGTACATGGCACATAGAGTCAAATCCATTCTTGCCAACATGCGTATCCCGTCCACTAGATCACGAGCTTGTTGACCATGCCGCGTGAAA
>KR059824_Middle_East
TTCATATAGTTTACTGTATATCTACCCTACACATATGCAGTACTAATCCAGCATAAACGTAATGTATGTACATTACATTTTATGATCTACTTCATGTGTACGTACATAATATTAATGTAACAGGGACATAGTATGTATATAGTACATTAAACGATTTTCCACATGCATATTAAGTACGTACATCAGTATTAATGTAATAAGGACATAGTATGTATATTGTACATTAAACGATCTTCCTCATGCATATAAGCATGTATAATGCTTCTATCGGCAGTACATAGTACATTTTACTGCATATTCGTACATGGCACATAGAGTCAAATCCATTCCTGCCAACATGCGTATCCCGTCCACTAGATCACGAGCTTGTTGACCATGCCGCGTGAAA
>KR059825_Middle_East
TTCATATAGTTTACTGTATATCTACCCTACACATATGCAGTACTAATCCAGCATAAACGTAATGTATGTACATTACATTTTATGATCTACTTCATGTGTACGTACATAATATTAATGTAACAAGGACATAGTATGTATATAGTACATTAAACGATTTTCCACATGCATATTAAGCACGTACATCAGTATTAATGTAATAAGGACATAGTATGTATATTGTACATTAAACGATCTTCCTCATGCATATAAGCATGTATAATGCTTCTATCGACAGTACATAGTACATTTTGCTGCATATTCGTACATGGCACATAGAGTCAAATCCATTCTTGCCAACATGCGTATCCCGTCCACTAGATCACGAGCTTGTTGACCATGCCGCGTGAAA
>KR059826_Middle_East
TTCATATAGTTTACTGTATATCTACCCTACACATATGCAGTACTAATCCAGCATAAACGTAATGTATGTACATTACATTTTATGATCTACTTCATGTGTACGTACATAATATTAATGTAACAAGGACATAGTATGTATATAGTACATTAAACGATTTTCCACATGCATATTAAGCACGTACATCAGTATTAATGTAATAAGGACATAGTATGTATATTGTACATTAAACGATCTTCCTCATGCATATAAGCATGTATAATGTTTCTATCGGCAGTACATAGTACATTTTACTGCATATTCGTACATGGCACATAGAGTCAAATCCATTCTTGCCAACATGCGTATCCCGTCCATTAGATCACGAGCTTGTTGACCATGCCGCGTGAAA
>KR059827_Middle_East
TTCATATAGTTTACTGTATATCTACCCTACACATATGCAGTACTAATCCAGCATAAACGTAATGTATGTACATTACATTTTATGATCTACTTCATGTGTACGTACATAATATTAATGTAACAAGGACATAGTATGTATATAGTACATTAAACGATTTTCCACATGCATATTAAGCACGTACATCAGTATTAATGTAATAAGGACATAATATGTATATTGTACATTAAACGATCTTCCTCATGCATATAAGCATGTATAATACTTCTATCGGCAGTACATAGTACATTTTACTGCATGTTCGTACATGGCACATAGAGTCAAATCCATTCTTGCCAACATGCGTATCCCGTCCACTAGATCACGAGCTTGTTGACCATGCCGCGTGAAA
>KR059828_Middle_East
TTCATATAGTTTACTGTATATCTACCCTACACATATGCAGTACTAATCCAGCATAAACGTAATGTATGTACATTACATTTTATGATCTACTTCATGTGTACGTACATAATATTAATGTAACAAGGACATAGTATGTATATAGTACATTAAACGATTTTCCACATGCATATTAAGCACGTACATCAGTATTAATGTAATAAGGACATAGTATGTATATTGTACATTAAACGATCTTCCCCATGCATATAAGCATGTATAATACTTCTATCGGCAGTACATAGTACATTTTACTGCATGTTCGTACATGGCACATAGAGTCAAATCCATTCTTGTCAACATGCGTATCCCGTCCATTAGATCACGAGCTTGTTGACCATGCCGCGTGAAA
>KR059829_Middle_East
TTCATATAGTTTACTGTATATCTACCCTACACATATGCAGTACTAATCCAGCATAAACGTAATGTATGTACATTACATTTTATGATCTACTTCATGTGTACGTACATAATATTAATGTAACAAGGACATAGTATGTATATAGTACATTAAACGATTTTCCGCATGCATATTAAGCACGTACATCAGTATTAATGTAATAAGGACATAGTATGTATATTGTACATTAAACGATCTTCCTCATGCATATAAGCATGTATAATGCTTCTATCGGCAGTACATAGTACATTCTACTGCATATTCGTACATGGCACATAGAGTCAAATCCATTCTTGCCAACATGCGTATCCCGTCCATTAGATCACGAGCTTGTTGACCATGCCGCGTGAAA
>KR059830_Middle_East
TTCATATAGTTTACTGTATATCTACCCTACACATATGCAGTACTAATCCAGCATAAACGTAATGTATGTACATTACATTTTATGATCTACTTCATGTGTACGTACATAATATTAATGTAACAAGGACATAGTATGTATATAGTACATTAAACGATTTTCCACATGCATATTAAGCACGTACATCAGTATTAATGTAATAAGGACATAGTATGTATATCGTACATTAAACGATCTTCCTCATGCATATAAGCATGTATAATGCTTCTATCGGCAGTACATAGTACATTTTACTGCATATTCGTACATGGCACATAGAGTCAAATCCATTCTTGCCAACATGCGTATCCCGTCCACTAGATCACGAGCTTGTTGACCATGCCGCGTGAAA
>KR059846_North_Africa
TTCATATAGTTTACTGTATATCTACCCTACACATATGCAGTACTAATCCAGCATAAACGTAATGTATGTACATTACATTTTATGATCTACTTCATGTGTACGTACATAATATTAATGTAACAAGGACATAGTATGTATATAGTACATTAAACGATTTTCCACATGCATATTAAGCACGTACATCAATATTAATGTAATAAGGACATAATATGTATATCGTACATTAAACGATCTTCCTCATGCATATAAGCATGTATAATGTTCCTATCGGCAGTACATAGTACATTTTACTGCATGTTCGTACATGGCACATAGAGTCAAATCCATTCTTGCCAACATGCGTATCCCGTCCACTAGATCACGAGCTTGTTGACCATGCCGCGTGAAA
>KR059847_North_Africa
TTCATATAGTTTACTGTATATCTACCCTACACATATGCAGTACTAATCCAGCATAAACGTAATGTATGTACATTACATTTTATGATCTACTTCATGTGTACGTACATAATATTAATGTAACAAGGACATAGTATGTATATAGTACATTAAACGATTTTCCACATGCATATTAAGCACGTACATCAGTATTAATGTAATAAGGACATAGTATGTATATCGTACATTAAACGATCTCCCTCATGCATATAAGCATGTATAATGTTTCTATCGGCAGTACATAGTACATTCTACTGCATATTCGTACATGGCACATAGAGTCAAATCCATTCTTGTCAACATGCGTATCCCGTCCACTAGATCACGAGCTTGTTGACCATGCCGCGTGAAA
